# Supplementary material
Source: publisher figshare collection journal article supplement (https://acs.figshare.com/ndownloader/files/4169704)

**Design and synthesis of skeletal analogues of gambierol:  
Attenuation of amyloid- $\beta$  and tau pathology with  
voltage-gated potassium channel and *N*-methyl-D-aspartate  
receptor implications**

Eva Alonso<sup>†</sup>, Haruhiko Fuwa<sup>#</sup>, Carmen Vale<sup>†</sup>, Yuto Suga<sup>#</sup>, Tomomi Goto<sup>#</sup>, Yu Konno<sup>#</sup>,  
Makoto Sasaki<sup>#</sup>, Frank M. LaFerla<sup>‡</sup>, Mercedes R. Vieytes<sup>+</sup>, Lydia Giménez-Llort<sup>¶</sup>, and  
Luis M. Botana<sup>†,\*</sup>

<sup>†</sup>*Departamento de Farmacología, Facultad de Veterinaria, Universidad de Santiago de Compostela, Lugo, Spain,* <sup>#</sup>*Graduate School of Life Sciences, Tohoku University, 2-1-1 Katahira, Aoba-ku, Sendai 980-8577, Japan,* <sup>‡</sup>*Department of Neurobiology and Behavior, University of California, Irvine, Irvine, California 92697, USA,* <sup>+</sup>*Departamento de Fisiología, Facultad de Veterinaria, Universidad de Santiago de Compostela, 27003 Lugo, Spain,* and <sup>¶</sup>*Departamento de Psiquiatría y Medicina Legal, Instituto de Neurociencias, Universidad Autònoma de Barcelona, 08193 Bellaterra, Spain.*

\*Corresponding Author. E-mail: Luis.Botana@usc.es, Phone/Fax:+34982252242.

***Contents***

|                                                                                     |     |
|-------------------------------------------------------------------------------------|-----|
| General remarks for synthetic chemistry.....                                        | S2  |
| Experimental procedure and characterization data for all new compounds.....         | S3  |
| Copies of <sup>1</sup> H and <sup>13</sup> C NMR spectra for all new compounds..... | S37 |

**General remarks for synthetic chemistry.** All reactions sensitive to moisture and/or air were carried out under an atmosphere of argon in dry, freshly distilled solvents under anhydrous conditions using oven-dried glassware unless otherwise noted. Anhydrous dichloromethane ( $\text{CH}_2\text{Cl}_2$ ) was purchased from Kanto Chemical Co. Inc. and used directly without further drying. Anhydrous tetrahydrofuran (THF), diethyl ether ( $\text{Et}_2\text{O}$ ), and toluene were purchased from Wako Pure Chemical Industries, Ltd. and further purified by a Glass Contour solvent purification system under an atmosphere of argon immediately prior to use. Hexamethylphosphoramide (HMPA) was distilled from calcium hydride under reduced pressure. All other chemicals were purchased at highest commercial grade and used directly. Analytical thin-layer chromatography (TLC) and preparative TLC were performed using E. Merck silica gel 60  $\text{F}_{254}$  plates (0.25-mm thickness). Flash column chromatography was carried out using Kanto Chemical silica gel 60N (40-100 mesh, spherical, neutral) or Fuji Silysia silica gel BW-300 (200-400 mesh). Melting points are uncorrected. Chemical shift values of  $^1\text{H}$  and  $^{13}\text{C}$  NMR spectra are reported in ppm ( $\delta$ ) downfield from tetramethylsilane with reference to internal residual solvent [ $^1\text{H}$  NMR,  $\text{CHCl}_3$  (7.24),  $\text{C}_6\text{HD}_5$  (7.15);  $^{13}\text{C}$  NMR,  $\text{CDCl}_3$  (77.0),  $\text{C}_6\text{D}_6$  (128.0)] unless otherwise noted. Coupling constants ( $J$ ) are reported in Hertz (Hz). The following abbreviations were used to designate the multiplicities: s = singlet; d = doublet; t = triplet; m = multiplet; br = broad.

**Experimental procedure and characterization data for all new compounds.**

**Alcohol 6.** To a solution of methyl ester **4** (2.31 g, 5.86 mmol) in CH<sub>2</sub>Cl<sub>2</sub> (60 mL) at –78 °C was added DIBALH (1.02 M solution in *n*-hexane, 6.03 mL, 6.15 mmol), and the resultant solution was stirred at –78 °C for 35 min. The reaction was quenched with MeOH. The mixture was diluted with EtOAc and saturated aqueous potassium sodium tartrate solution and stirred vigorously at room temperature until the layers became clear. The organic layer was separated and washed with brine, dried (Na<sub>2</sub>SO<sub>4</sub>), and filtered. Concentration under reduced pressure afforded a crude aldehyde, which was used in the next reaction without further purification.

To a suspension of Ph<sub>3</sub>P<sup>+</sup>CH<sub>3</sub>Br<sup>–</sup> (7.32 g, 20.5 mmol) in THF (60 mL) at 0 °C was added NaHMDS (1.0 M solution in THF, 17.6 mL, 17.6 mmol), and the resultant suspension was stirred at 0 °C for 1 h. To this suspension was added a solution of the above crude aldehyde in THF (10mL) via cannula, and the resultant solution was stirred at 0 °C for 2 h. The reaction was quenched with saturated aqueous NH<sub>4</sub>Cl solution, and the resultant mixture was extracted with EtOAc. The organic layer was washed with H<sub>2</sub>O and brine, dried (Na<sub>2</sub>SO<sub>4</sub>), and filtered. Concentration under reduced pressure gave olefin **5**, which was used in the next reaction without further purification.

To a solution of the above olefin **5** in THF (40 mL) was added TBAF (1.0 M solution in THF, 15.2 mL, 15.2 mmol). The resultant solution was stirred at room temperature overnight and concentrated under reduced pressure. Purification of the residue by flash column chromatography on silica gel (30% EtOAc/hexanes) gave alcohol **6** (1.39 g,

82% for the three steps) as a colorless oil:  $[\alpha]_D^{24} -40.2$  ( $c$  1.00,  $\text{CHCl}_3$ ); IR (KBr) 3435, 2978, 2940, 2871, 1115, 1093  $\text{cm}^{-1}$ ;  $^1\text{H}$  NMR (600 MHz,  $\text{CDCl}_3$ )  $\delta$  7.49—7.47 (m, 2H), 7.37—7.31 (m, 3H), 5.90 (m, 1H), 5.51 (s, 1H), 5.13 (dddd,  $J = 17.2, 1.7, 1.7, 1.4$  Hz, 1H), 5.07 (dddd,  $J = 10.0, 1.7, 1.4, 1.0$  Hz, 1H), 4.30 (dd,  $J = 10.3, 4.8$  Hz, 1H), 3.69 (dd,  $J = 10.3, 10.3$  Hz, 1H), 3.54 (ddd,  $J = 13.4, 8.4, 4.1$  Hz, 1H), 3.35 (ddd,  $J = 10.3, 9.3, 4.8$  Hz, 1H), 3.31 (dd,  $J = 9.3, 3.5$  Hz, 1H), 2.44 (dddd,  $J = 14.8, 8.9, 3.4, 1.4, 1.4$  Hz, 1H), 2.20 (dd,  $J = 11.6, 4.1$  Hz, 1H), 2.15 (m, 1H), 1.77 (dd,  $J = 12.1, 12.1$  Hz, 1H), 1.59 (br s, 1H), 1.29 (s, 3H);  $^{13}\text{C}$  NMR (150 MHz,  $\text{CDCl}_3$ )  $\delta$  137.4, 135.6, 129.1, 128.3 (2C), 126.1 (2C), 116.7, 101.7, 84.4, 76.6, 74.3, 71.4, 69.3, 45.0, 33.4, 21.9; HRMS (ESI) calcd for  $\text{C}_{17}\text{H}_{22}\text{O}_4\text{Na}$   $[(\text{M} + \text{Na})^+]$  313.1410, found 313.1421.

**Dihydropyran 8.** To a suspension of  $[\text{Ir}(\text{cod})\text{Cl}]_2$  (1.8 mg, 0.00266 mmol) and  $\text{Na}_2\text{CO}_3$  (5.6 mg, 0.0531 mmol) in toluene (1 mL) was added a solution of alcohol **6** (25.7 mg, 0.0885 mmol) and vinyl acetate (40  $\mu\text{L}$ , 0.44 mmol) in toluene (1 mL) via cannula, and the resultant solution was stirred at 100  $^\circ\text{C}$  for 10 h. The reaction mixture was quenched with moist  $\text{Et}_2\text{O}$ , and the mixture was concentrated under reduced pressure. The residue was passed through a plug of silica gel (eluted with 2%  $\text{EtOAc}$ /hexanes) to afford crude vinyl ether **7**, which was used in the next reaction without further purification.

To a solution of the above crude vinyl ether **7** in benzene (2 mL, degassed by repeating freeze-thaw cycle three times) was added the Grubbs second-generation catalyst (1.5 mg, 0.00177 mmol), and the resultant solution was stirred at 60  $^\circ\text{C}$  for 16 h.

The reaction was quenched with Et<sub>3</sub>N, and the mixture was concentrated under reduced pressure. Purification of the residue by flash column chromatography on silica gel (1 to 2% EtOAc/hexanes) afforded dihydropyran **8** (18.6 mg, 73% for the two steps) as a colorless crystals: mp 141—143 °C (hexane/EtOAc); [ $\alpha$ ]<sub>D</sub><sup>26</sup> -13.1 (*c* 0.30, CHCl<sub>3</sub>); IR (KBr) 1637, 1109, 1078, 1019, 698 cm<sup>-1</sup>; <sup>1</sup>H NMR (600 MHz, CDCl<sub>3</sub>)  $\delta$  7.49—7.47 (m, 2H), 7.38—7.31 (m, 3H), 6.15 (m, 1H), 5.54 (s, 1H), 4.65 (ddd, *J* = 5.8, 5.8, 2.0 Hz, 1H), 4.32 (dd, *J* = 10.3, 4.8 Hz, 1H), 3.73 (dd, *J* = 10.3, 10.3 Hz, 1H), 3.69 (ddd, *J* = 12.1, 9.3, 4.5 Hz, 1H), 3.54 (dd, *J* = 10.7, 5.8 Hz, 1H), 3.47 (ddd, *J* = 10.0, 10.0, 4.8 Hz, 1H), 2.30 (dd, *J* = 11.3, 4.5 Hz, 1H), 2.20 (dddd, *J* = 16.4, 5.1, 5.1, 0.7 Hz, 1H), 1.94 (dddd, *J* = 16.4, 11.0, 2.1, 2.1 Hz, 1H), 1.87 (dd, *J* = 11.7, 11.7 Hz, 1H), 1.28 (s, 3H); <sup>13</sup>C NMR (150 MHz, C<sub>6</sub>D<sub>6</sub>)  $\delta$  141.3, 138.5, 129.0, 128.3 (2C), 126.7 (2C), 101.9, 97.9, 77.7, 76.8, 75.3, 74.2, 69.3, 42.5, 24.0, 16.9; HRMS (EI) calcd for C<sub>17</sub>H<sub>20</sub>O<sub>4</sub> (M<sup>+</sup>) 288.1362, found 288.1365.

**Acetal 9.** To a solution of dihydropyran **8** (950 mg, 3.29 mmol) in EtOH/THF (2:1, v/v, 25 mL) was added Pd/C (300 mg) suspended in EtOH/THF (2:1, v/v, 5 mL), and the resultant suspension was stirred under an atmosphere of hydrogen (balloon) at room temperature for three days. The catalyst was filtered off, and the filtrate was concentrated under reduced pressure to give a crude diol, which was used in the next reaction without further purification.

To a solution of the above diol in CH<sub>2</sub>Cl<sub>2</sub> (25 mL) were added *p*-MeOC<sub>6</sub>H<sub>4</sub>CH(OMe)<sub>2</sub> (1.12 mL, 6.58 mmol) and PPTS (83 mg, 0.329 mmol), and the

resultant solution was stirred at room temperature for 3.5 h. The reaction was quenched with Et<sub>3</sub>N, and the mixture was concentrated under reduced pressure. Purification of the residue by flash column chromatography on silica gel (10 to 20% EtOAc/hexanes) afforded acetal **9** (950 mg, 90% for the two steps) as a colorless oil:  $[\alpha]_D^{26} -38.7$  (*c* 0.16, CHCl<sub>3</sub>); IR (KBr) 2941, 2872, 1517, 1249, 1093, 828 cm<sup>-1</sup>; <sup>1</sup>H NMR (600 MHz, CDCl<sub>3</sub>)  $\delta$  7.41—7.38 (m, 2H), 6.88—6.85 (m, 2H), 5.48 (s, 1H), 4.28 (dd, *J* = 10.3, 4.5 Hz, 1H), 3.78 (s, 3H), 3.73—3.67 (m, 3H), 3.61 (m, 1H), 3.47 (ddd, *J* = 9.7, 4.5, 4.5 Hz, 1H), 3.29 (dd, *J* = 12.0, 3.8 Hz, 1H), 2.14 (dd, *J* = 11.3, 4.5 Hz, 1H), 1.88—1.68 (m, 3H), 1.63—1.55 (m, 2H), 1.30 (s, 3H); <sup>13</sup>C NMR (150 MHz, C<sub>6</sub>D<sub>6</sub>)  $\delta$  160.5, 131.1, 128.1 (2C), 113.7 (2C), 102.1, 82.2, 77.6, 76.2, 73.1, 69.5, 59.5, 54.7, 43.9, 26.2, 24.4, 15.4; HRMS (ESI) calcd for C<sub>18</sub>H<sub>24</sub>O<sub>5</sub>Na [(M + Na)<sup>+</sup>] 343.1516, found 343.1519.

**Iodide 10.** To a solution of acetal **9** (950 mg, 2.97 mmol) in CH<sub>2</sub>Cl<sub>2</sub> (30 mL) at -40 °C was added DIBALH (1.02 M solution in *n*-hexane, 11.7 mL, 11.9 mmol). The resultant solution was stirred at -40 °C for 10 min and then at 0 °C for 3 h. The reaction was quenched with MeOH and saturated aqueous potassium sodium tartrate solution. The mixture was diluted with EtOAc and stirred vigorously at room temperature until the layers became clear. The organic layer was separated and washed with brine, dried over Na<sub>2</sub>SO<sub>4</sub>, filtered, and concentrated under reduced pressure. The residue was passed through a plug of silica gel (50% EtOAc/hexanes) to give an alcohol, which was used in the next reaction without further purification.

To a solution of the above alcohol in THF (30 mL) were added imidazole (0.38 g, 5.64 mmol), PPh<sub>3</sub> (1.18 g, 4.51 mmol), and I<sub>2</sub> (0.93 g, 3.67 mmol), and the resultant mixture was stirred at room temperature for 1 h. The reaction was quenched with saturated aqueous Na<sub>2</sub>SO<sub>3</sub> solution and the mixture was extracted with EtOAc. The organic layer was washed with brine, dried over Na<sub>2</sub>SO<sub>4</sub>, filtered, and concentrated under reduced pressure. Purification of the residue by flash column chromatography on silica gel (10 to 20% EtOAc/hexanes) gave iodide **10** (1.19 g, 98% for the two steps) as a colorless oil:  $[\alpha]_D^{21} +43.3$  (*c* 1.19, CHCl<sub>3</sub>); IR (KBr) 2940, 2868, 1611, 1512, 1248, 1093, 1074, 819 cm<sup>-1</sup>; <sup>1</sup>H NMR (500 MHz, CDCl<sub>3</sub>)  $\delta$  7.25—7.21 (m, 2H), 6.88—6.85 (m, 2H), 4.55 (d, *J* = 11.0 Hz, 1H), 4.40 (d, *J* = 11.0 Hz, 1H), 3.79 (s, 3H), 3.65 (ddd, *J* = 11.5, 11.5, 4.0 Hz, 1H), 3.58 (m, 1H), 3.53—3.42 (m, 3H), 3.23 (dd, *J* = 12.0, 4.0 Hz, 1H), 2.97 (m, 1H), 2.24 (dd, *J* = 11.5, 5.0 Hz, 1H), 1.77 (m, 1H), 1.73—1.64 (m, 2H), 1.61—1.49 (m, 2H), 1.18 (s, 3H); <sup>13</sup>C NMR (125 MHz, CDCl<sub>3</sub>)  $\delta$  156.8, 129.9, 129.6 (2C), 113.9 (2C), 80.4, 79.3, 75.7, 72.4, 70.9, 59.9, 55.3, 43.1, 25.8, 24.1, 15.1, 9.1; HRMS (EI) calcd for C<sub>18</sub>H<sub>25</sub>IO<sub>4</sub> (M<sup>+</sup>) 432.0798, found 432.0793.

**Exocyclic enol ether 11.** To a solution of iodide **10** (1.19 g, 2.75 mmol) in THF (30 mL) at 0 °C was added KO<sup>*t*</sup>-Bu (925 mg, 8.25 mmol), and the resultant solution was stirred at 0 °C for 40 min. The reaction was quenched with H<sub>2</sub>O, and the mixture was extracted with EtOAc. The organic layer was washed with brine, dried over Na<sub>2</sub>SO<sub>4</sub>, filtered, and concentrated under reduced pressure. Purification of the residue by flash column chromatography on silica gel (10 to 20% EtOAc/hexanes) gave exocyclic enol

ether **11** (810 mg, 97%) as a colorless oil:  $[\alpha]_{\text{D}}^{21} -49.1$  ( $c$  0.91,  $\text{CHCl}_3$ ); IR (KBr) 2938, 2868, 1512, 1246, 1080, 822  $\text{cm}^{-1}$ ;  $^1\text{H}$  NMR (500 MHz,  $\text{CDCl}_3$ )  $\delta$  7.28—7.22 (m, 2H), 6.88—6.83 (m, 2H), 4.58 (d,  $J = 12.0$  Hz, 1H), 4.51 (s, 1H), 4.42 (d,  $J = 11.5$  Hz, 1H), 4.34 (s, 1H), 3.97 (dd,  $J = 7.0, 7.0$  Hz, 1H), 3.87 (dd,  $J = 12.0, 4.5$  Hz, 1H), 3.79 (s, 3H), 3.65—3.55 (m, 2H), 2.12 (dd,  $J = 12.0, 6.5$  Hz, 1H), 1.88 (m, 1H), 1.77 (dd,  $J = 13.5, 6.0$  Hz, 1H), 1.75—1.54 (m, 3H), 1.20 (s, 3H);  $^{13}\text{C}$  NMR (125 MHz,  $\text{CDCl}_3$ )  $\delta$  159.1, 157.0, 130.2, 129.3 (2C), 113.8 (2C), 92.0, 77.3, 73.4, 72.3, 69.8, 60.3, 55.3, 44.2, 25.3, 24.3, 16.0; HRMS (FAB) calcd for  $\text{C}_{18}\text{H}_{25}\text{O}_4$   $[(\text{M} + \text{H})^+]$  305.1753, found 305.1751.

**Enol ether 14.** To a solution of exocyclic enol ether **11** (163 mg, 0.536 mmol) in THF (5 mL) was added a solution of 9-BBN-H dimer (170 mg, 0.697 mmol) in THF (8 mL), and the resultant mixture was stirred at room temperature for 2.5 h. To the solution was added 3 M aqueous  $\text{Cs}_2\text{CO}_3$  (0.450 mL, 1.35 mmol), and the resulting mixture was vigorously stirred at room temperature for 15 min. To this mixture were added  $\text{PdCl}_2(\text{dppf})\cdot\text{CH}_2\text{Cl}_2$  (74 mg, 0.0902 mmol) and a solution of the above crude enol phosphate **13** (275 mg, prepared from the corresponding lactone (185 mg, 0.451 mmol) according to the reported procedure<sup>1</sup> immediately before use) in DMF (5 mL) via cannula, and the resultant mixture was stirred at 50 °C for 10 h. The reaction mixture was extracted with EtOAc, washed with brine, dried ( $\text{Na}_2\text{SO}_4$ ), filtered, and concentrated under reduced pressure. Purification of the residue by flash column

---

<sup>1</sup> Fuwa, H.; Kainuma, N.; Tachibana, K.; Sasaki, M. *J. Am. Chem. Soc.* **2002**, *124*, 14983.



chromatography on silica gel (10 to 20% EtOAc/hexanes) gave enol ether **14** (277 mg, 88%) as a colorless solid: mp 96—99 °C (hexane/EtOAc);  $[\alpha]_D^{26} +8.3$  ( $c$  1.15,  $\text{CHCl}_3$ ); IR (KBr) 2936, 2871, 1513, 1247, 1097, 1068, 819  $\text{cm}^{-1}$ ;  $^1\text{H}$  NMR (500 MHz,  $\text{C}_6\text{D}_6$ )  $\delta$  7.20—7.15 (m, 2H), 6.81—6.75 (m, 2H), 5.01 (dd,  $J = 8.0, 2.5$  Hz, 1H), 4.42 (m, 1H), 4.16 (m, 1H), 3.90 (dd,  $J = 12.0, 6.0$  Hz, 1H), 3.83 (dd,  $J = 9.5, 9.5$  Hz, 1H), 3.63 (dd,  $J = 11.0, 8.5$  Hz, 1H), 3.47 (ddd,  $J = 8.5, 8.5, 3.5$  Hz, 1H), 3.43—3.31 (m, 3H), 3.31—3.18 (m, 5H), 3.16 (dd,  $J = 11.0, 4.0$  Hz, 1H), 3.03 (dd,  $J = 12.5, 3.5$  Hz, 1H), 2.95 (m, 1H), 2.75 (d,  $J = 15.0$  Hz, 1H), 2.41 (m, 1H), 2.24—2.16 (m, 3H), 2.16—2.02 (m, 2H), 2.00—1.88 (m, 2H), 1.87—1.67 (m, 7H), 1.66—1.52 (m, 3H), 1.45 (s, 3H), 1.40—1.33 (m, 2H), 1.30 (s, 3H), 1.27 (s, 3H), 1.16 (s, 3H), 1.15 (s, 3H);  $^{13}\text{C}$  NMR (125 MHz,  $\text{C}_6\text{D}_6$ )  $\delta$  159.7, 151.9, 131.0, 129.5 (2C), 114.0 (2C), 108.3, 98.4, 88.7, 81.1, 80.9, 80.8, 79.9, 77.6, 76.5, 76.0, 73.09, 73.06, 72.6, 72.1, 70.3, 63.4, 59.7, 54.7, 53.9, 44.4, 41.4, 32.4, 30.1, 29.8, 28.8, 27.3, 26.2, 24.8, 23.0, 19.4, 18.9, 16.2, 15.4; HRMS (ESI) calcd for  $\text{C}_{40}\text{H}_{58}\text{O}_{10}\text{Na}$   $[(\text{M} + \text{Na})^+]$  721.3928, found 721.3940.

**Ketone 15.** To a solution of enol ether **14** (1.36 g, 1.95 mmol) in THF (30 mL) at 0 °C was added  $\text{BH}_3\cdot\text{SMe}_2$  (1.9 M solution in THF, 5.10 mL, 9.75 mmol). After being stirred at room temperature for 5 h, the reaction mixture was treated successively with EtOH, saturated aqueous  $\text{NaHCO}_3$  solution, and 30% aqueous  $\text{H}_2\text{O}_2$  solution, and the resultant mixture was stirred at room temperature for 2 h. The reaction mixture was extracted with EtOAc, and the organic layer was washed successively with  $\text{H}_2\text{O}$ , saturated aqueous  $\text{Na}_2\text{SO}_3$  solution, and brine. The aqueous layers were extracted with EtOAc.

The combined organic layer was dried (Na<sub>2</sub>SO<sub>4</sub>), filtered, and concentrated under reduced pressure. Purification of the residue by flash column chromatography on silica gel (40 to 70% EtOAc/hexanes) afforded an approximately 3:1 mixture of inseparable diastereomeric alcohols (1.26 g, 90%).

To a solution of the above mixture of alcohols (1.26 g, 1.75 mmol) in CH<sub>2</sub>Cl<sub>2</sub> (20 mL) were added 4 Å molecular sieves (250 mg), NMO (615 mg, 5.25 mmol), and TPAP (92 mg, 0.26 mmol). After being stirred at room temperature for 30 min, the reaction mixture was concentrated under reduced pressure. Purification of the residue by flash column chromatography on silica gel (40% Et<sub>2</sub>O/hexanes) afforded ketone **15** (881 mg, 70%) as a colorless oil along with its diastereomer (300 mg, 24%) as a colorless oil. Data for **15**:  $[\alpha]_D^{26} -7.8$  (*c* 1.32, CHCl<sub>3</sub>); IR (KBr) 2943, 2872, 1707, 1513, 1248, 1077, 680 cm<sup>-1</sup>; <sup>1</sup>H NMR (600 MHz, C<sub>6</sub>D<sub>6</sub>)  $\delta$  7.18—7.16 (m, 2H), 6.80—6.77 (m, 2H), 4.44 (dd, *J* = 6.5, 5.9 Hz, 1H), 4.38 (d, *J* = 11.3 Hz, 1H), 4.14 (d, *J* = 11.3 Hz, 1H), 3.91 (dd, *J* = 11.3, 5.5 Hz, 1H), 3.75 (ddd, *J* = 8.9, 8.6, 3.1 Hz, 1H), 3.69 (m, 1H), 3.64 (dd, *J* = 11.3, 8.9 Hz, 1H), 3.47—3.30 (m, 5H), 3.28 (s, 3H), 3.26—3.19 (m, 2H), 3.05—2.99 (m, 2H), 2.59 (ddd, *J* = 11.3, 11.3, 2.8 Hz, 1H), 2.36 (dd, *J* = 11.3, 5.0 Hz, 1H), 2.34—2.25 (m, 2H), 2.16—2.04 (m, 2H), 2.01 (d, *J* = 12.5 Hz, 1H), 1.97—1.88 (m, 3H), 1.79—1.62 (m, 6H), 1.50 (m, 1H), 1.45 (s, 3H), 1.39 (m, 1H), 1.29 (s, 3H), 1.22 (m, 1H), 1.16 (m, 1H), 1.10 (s, 3H), 1.04 (s, 3H), 0.95 (s, 3H); <sup>13</sup>C NMR (150 MHz, C<sub>6</sub>D<sub>6</sub>)  $\delta$  214.7, 130.9, 129.6 (2C), 114.1 (2C), 98.4, 88.5, 81.3, 81.1, 80.9, 77.9, 77.8, 76.9, 76.4, 76.1, 73.0, 72.5, 72.1, 70.3, 63.4, 59.6, 54.7, 53.7, 44.3, 41.9, 38.1, 37.0,

32.3, 30.1, 29.8, 28.8, 26.1, 25.7, 24.5, 22.1, 19.4, 17.3, 16.6, 15.2; HRMS (ESI) calcd for  $C_{40}H_{58}O_{11}Na [(M + Na)^+]$  737.3877, found 737.3874. Data for the diastereomer:  $[\alpha]_D^{26} -11.8$  (c 1.10,  $CHCl_3$ ); IR (KBr) 2948, 2868, 1700, 1511, 1248, 1079, 680  $cm^{-1}$ ;  $^1H$  NMR (600 MHz,  $C_6D_6$ )  $\delta$  7.12—7.09 (m, 2H), 6.74—6.71 (m, 2H), 4.54 (dd,  $J = 11.3, 2.7$  Hz, 1H), 4.35 (d,  $J = 11.3$  Hz, 1H), 4.11 (d,  $J = 11.3$  Hz, 1H), 3.95 (dd,  $J = 11.3, 5.8$  Hz, 1H), 3.77—3.68 (m, 2H), 3.65 (dd,  $J = 11.3, 8.9$  Hz, 1H), 3.47—3.30 (m, 5H), 3.28 (s, 3H), 3.26—3.20 (m, 2H), 3.04 (m, 1H), 2.87 (ddd,  $J = 10.3, 10.3, 10.3$  Hz, 1H), 2.58 (dd,  $J = 12.7, 3.4$  Hz, 1H), 2.38 (dd,  $J = 11.7, 4.9$  Hz, 1H), 2.39 (ddd,  $J = 12.7, 11.7, 2.4$  Hz, 1H), 2.16 (ddd,  $J = 12.7, 10.3, 2.4$  Hz, 1H), 2.07—1.89 (m, 6H), 1.87—1.79 (m, 2H), 1.77—1.60 (m, 6H), 1.56—1.49 (m, 2H), 1.47 (s, 3H), 1.29 (s, 3H), 1.27 (s, 3H), 1.14 (s, 3H), 1.11 (s, 3H);  $^{13}C$  NMR (150 MHz,  $C_6D_6$ )  $\delta$  212.9, 131.9, 130.6 (2C), 116.7 (2C), 98.1, 88.5, 82.7, 81.8, 80.9, 78.2, 77.6, 76.3, 76.0, 75.7, 73.0, 72.1, 71.8, 70.7, 64.2, 59.1, 55.7, 53.7, 44.1, 41.7, 38.6, 37.0, 33.5, 31.1, 29.7, 28.8, 27.9, 25.1, 24.0, 20.7, 19.4, 17.9, 15.6, 15.1; HRMS (ESI) calcd for  $C_{40}H_{58}O_{11}Na [(M + Na)^+]$  737.3877, found 737.3880.

**Mixed thioacetal 16.** To a solution of ketone **15** (159 mg, 0.222 mmol) in  $CH_2Cl_2$ /pH 7 phosphate buffer (10:1, v/v, 10 mL) at 0 °C was added DDQ (76 mg, 0.333 mmol), and the resultant solution was stirred at room temperature for 1 h. The reaction was quenched with saturated aqueous  $NaHCO_3$  solution at 0 °C. The mixture was extracted with EtOAc, and the organic layer was washed with brine, dried ( $Na_2SO_4$ ), filtered, and concentrated under reduced pressure. The residue was passed through a plug of silica

gel (eluted with 70% EtOAc/hexanes) to afford a hemiacetal, which was used in the next reaction without further purification.

To a solution of the above hemiacetal in CH<sub>2</sub>Cl<sub>2</sub> (8 mL) were added EtSH (2 mL) and Zn(OTf)<sub>2</sub> (40.3 mg, 0.111 mmol), and the resultant mixture was stirred at room temperature overnight. The reaction was quenched with Et<sub>3</sub>N, and the resulting mixture was concentrated under reduced pressure. The residue was immediately dissolved in CH<sub>2</sub>Cl<sub>2</sub> (8 mL) and treated with Et<sub>3</sub>N (0.460 mL, 3.33 mmol), Ac<sub>2</sub>O (0.420 mL, 4.44 mmol), and DMAP (136 mg, 1.11 mmol). The resultant solution was stirred at room temperature for 45 min. The reaction was quenched with MeOH. The reaction mixture was diluted with EtOAc and washed successively with 1 M aqueous HCl solution, saturated aqueous NaHCO<sub>3</sub> solution, and brine. The organic layer was dried (Na<sub>2</sub>SO<sub>4</sub>), filtered, and concentrated under reduced pressure. Purification of the residue by flash column chromatography on silica gel (35 to 40% EtOAc/hexanes) gave mixed thioacetal **16** (144 mg, 95% for the three steps) as colorless crystals: mp 109—111 °C (hexanes/EtOAc); [ $\alpha$ ]<sub>D</sub><sup>21</sup> -40.1 (*c* 1.11, CHCl<sub>3</sub>); IR (KBr) 2943, 2873, 1741, 1234, 1079, 1045, 681 cm<sup>-1</sup>; <sup>1</sup>H NMR (500 MHz, C<sub>6</sub>D<sub>6</sub>)  $\delta$  5.08 (m, 1H), 4.63 (dd, *J* = 10.5, 5.5 Hz, 1H), 4.21 (m, 1H), 4.16 (dd, *J* = 11.0, 6.5 Hz, 1H), 4.03 (dd, *J* = 11.5, 5.0 Hz, 1H), 3.68 (m, 1H), 3.64 (dd, *J* = 11.5, 4.5 Hz, 1H), 3.43—3.33 (m, 3H), 3.17 (dd, *J* = 11.5, 4.0 Hz, 1H), 3.11 (ddd, *J* = 12.0, 10.0, 4.5 Hz, 1H), 3.06—2.99 (m, 2H), 2.43—2.30 (m, 3H), 2.26—2.12 (m, 5H), 2.04—1.97 (m, 2H), 1.86 (dd, *J* = 11.0, 11.0 Hz, 1H), 1.82—1.70 (m, 4H), 1.70—1.51 (m, 11H), 1.50—1.38 (m, 2H), 1.21 (s, 3H), 1.17 (s, 3H), 1.15 (s,

3H), 1.13 (s, 3H);  $^{13}\text{C}$  NMR (125 MHz,  $\text{CDCl}_3$ )  $\delta$  169.9, 169.4, 92.9, 83.4, 82.1, 81.4, 81.1, 80.4, 79.5, 77.3, 74.9, 73.7, 73.44, 73.37, 72.3, 69.1, 65.2, 59.7, 54.1, 44.2, 34.8, 34.7, 32.6, 27.7, 26.4, 25.6, 25.0, 24.6, 20.7, 20.3, 19.9, 17.7, 16.6, 15.6, 15.1; HRMS (FAB) calcd for  $\text{C}_{35}\text{H}_{54}\text{O}_{11}\text{SNa}$   $[(\text{M} + \text{Na})^+]$  705.3285, found 705.3294.

**Heptacycle 17.** To a solution of mixed thioacetal **16** (85.8 mg, 0.125 mmol) in  $\text{CH}_2\text{Cl}_2$  (5 mL) at  $-40\text{ }^\circ\text{C}$  were added  $\text{Et}_3\text{SiH}$  (0.40 mL, 2.5 mmol), NIS (84 mg, 0.375 mmol), and  $\text{AgOTf}$  (96 mg, 0.375 mmol), and the resultant solution was stirred at  $-40\text{ }^\circ\text{C}$  for 1.5 h under exclusion of light. The reaction was quenched with saturated aqueous  $\text{Na}_2\text{S}_2\text{O}_3$  solution, and the mixture was extracted with EtOAc. The organic layer was washed with saturated aqueous  $\text{NaHCO}_3$  solution and brine, dried ( $\text{Na}_2\text{SO}_4$ ), filtered and concentrated under reduced pressure. Purification of the residue by flash column chromatography on silica gel (30 to 40% EtOAc/hexanes) afforded heptacycle **17** (70.2 mg, 90%) as colorless crystals: mp  $145\text{--}147\text{ }^\circ\text{C}$  (hexanes/EtOAc);  $[\alpha]_{\text{D}}^{21} -4.8$  ( $c$  0.54,  $\text{CHCl}_3$ ); IR (KBr) 2946, 2874, 1744, 1082, 1057, 772  $\text{cm}^{-1}$ ;  $^1\text{H}$  NMR (600 MHz,  $\text{CDCl}_3$ )  $\delta$  4.98 (m, 1H), 4.12 (dd,  $J = 11.4, 6.6$  Hz, 1H), 4.00 (dd,  $J = 12.0, 4.0$  Hz, 1H), 3.74 (ddd,  $J = 6.0, 4.2, 4.2$  Hz, 1H), 3.67 (ddd,  $J = 12.0, 12.0, 3.6$  Hz, 1H), 3.59 (dd,  $J = 12.0, 5.4$  Hz, 1H), 3.44 (m, 2H), 3.36 (dd,  $J = 11.4, 5.4$  Hz, 1H), 3.21 (ddd,  $J = 11.4, 9.6, 4.8$  Hz, 1H), 3.17—3.05 (m, 4H), 3.02 (dd,  $J = 12.6, 3.6$  Hz, 1H), 2.20 (ddd,  $J = 12.6, 3.6, 3.6$  Hz, 1H), 2.06 (s, 3H), 2.04 (s, 3H), 2.04—1.94 (m, 5H), 1.90 (d,  $J = 13.2$  Hz, 1H), 1.79—1.52 (m, 11H), 1.49—1.41 (m, 2H), 1.31 (s, 3H), 1.23 (s, 3H), 1.21 (s, 3H);  $^{13}\text{C}$  NMR (150 MHz,  $\text{CDCl}_3$ )  $\delta$  170.8, 170.1, 84.8, 81.2, 81.1, 80.9, 79.7, 79.6, 78.2,

76.2, 75.8, 73.5, 73.1, 72.9, 72.2, 72.0, 65.0, 59.9, 53.9, 43.5, 37.4, 32.0, 28.5, 27.1, 25.9, 24.8, 24.3, 24.1, 21.2, 20.9, 18.2, 16.1, 15.2; HRMS (ESI) calcd for  $C_{33}H_{50}O_{11}Na$   $[(M + Na)^+]$  645.3245, found 645.3252.

**Alcohol 18.** To a solution of heptacycle **17** (278 mg, 0.446 mmol) in MeOH/ $CH_2Cl_2$  (20 mL) was added NaOMe (12.1 mg, 0.223 mmol), and the resultant solution was stirred at room temperature for 9 h. The reaction was neutralized with Amberlyst<sup>®</sup> 15 ion-exchange resin, and the resultant mixture was filtered. The filtrate was concentrated under reduced pressure to afford a crude diol, which was used in the next reaction without further purification.

To a solution of the above material in DMF (20 mL) at 0 °C were added imidazole (304 mg, 4.46 mmol) and TBSCl (336 mg, 2.23 mmol), and the resultant solution was stirred at 0 °C for 30 min. The reaction was quenched with saturated aqueous  $NaHCO_3$  solution, and the mixture was extracted with  $Et_2O$ . The organic layer was washed with saturated aqueous  $NaHCO_3$  solution and brine, dried ( $Na_2SO_4$ ), filtered, and concentrated under reduced pressure. Purification of the residue by flash column chromatography on silica gel (30 to 40% EtOAc/hexanes) afforded alcohol **18** (233 mg, 80% for the two steps) as colorless crystals: mp 139—140 °C (hexanes/EtOAc);  $[\alpha]_D^{26}$  -13.3 (*c* 0.52,  $CHCl_3$ ); IR (KBr) 3446, 2950, 2875, 1081, 1057  $cm^{-1}$ ;  $^1H$  NMR (600 MHz,  $CDCl_3$ )  $\delta$  3.89 (m, 1H), 3.74 (dd, *J* = 10.0, 5.5 Hz, 1H), 3.67 (ddd, *J* = 12.4, 12.4, 3.8 Hz, 1H), 3.58 (dd, *J* = 12.4, 5.2 Hz, 1H), 3.50 (dd, *J* = 9.6, 7.9 Hz, 1H), 3.47—3.40 (m, 2H), 3.38—3.33 (m, 2H), 3.21 (ddd, *J* = 11.0, 9.6, 4.4 Hz, 1H), 3.17—3.12 (m, 2H),

3.12—3.05 (m, 2H), 3.02 (dd,  $J = 12.4, 3.4$  Hz, 1H), 2.47 (s, 1H), 2.19 (ddd,  $J = 12.4, 4.1, 4.1$  Hz, 1H), 2.06—1.95 (m, 4H), 1.90—1.42 (m, 15H), 1.31 (s, 3H), 1.21 (s, 6H), 0.87 (s, 9H), 0.06 (s, 6H);  $^{13}\text{C}$  NMR (150 MHz,  $\text{CDCl}_3$ )  $\delta$  85.1, 84.9, 83.0, 81.2, 80.0, 79.7, 78.3, 76.2, 75.8, 74.3, 73.1, 73.0, 72.2, 72.1, 65.9, 59.9, 53.9, 43.5, 37.4, 32.3, 29.5, 28.6, 27.3, 25.9, 25.8 (3C), 24.3, 24.2, 18.3, 18.2, 16.1, 15.2, -5.4, -5.5; HRMS (ESI) calcd for  $\text{C}_{35}\text{H}_{60}\text{O}_9\text{SiNa}$   $[(\text{M} + \text{Na})^+]$  675.3899, found 675.3902.

**Ketone 19.** To a solution of alcohol **18** (557 mg, 0.853 mmol) in  $\text{CH}_2\text{Cl}_2$  (20 mL) were added 4 Å molecular sieves (150 mg), NMO (300 mg, 2.56 mmol), and TPAP (45 mg, 0.128 mmol). After being stirred at room temperature for 10 min, the reaction mixture was filtered through a pad of Celite<sup>®</sup> and concentrated under reduced pressure. Purification of the residue by flash column chromatography on silica gel (15% EtOAc/hexanes) afforded ketone **19** (531 mg, 96%) as colorless crystals: mp 120—122 °C (hexanes/EtOAc);  $[\alpha]_{\text{D}}^{23} +18.3$  ( $c$  0.87,  $\text{CHCl}_3$ ); IR (KBr) 2950, 2874, 1716, 1081, 838  $\text{cm}^{-1}$ ;  $^1\text{H}$  NMR (600 MHz,  $\text{CDCl}_3$ )  $\delta$  3.84—3.80 (m, 3H), 3.69—3.63 (m, 2H), 3.58 (dd,  $J = 12.0, 5.1$  Hz, 1H), 3.45 (ddd,  $J = 10.7, 8.9, 4.8$  Hz, 1H), 3.34 (dd,  $J = 11.3, 5.1$  Hz, 1H), 3.16—3.11 (m, 2H), 3.11—3.04 (m, 2H), 2.99 (dd,  $J = 12.7, 3.8$  Hz, 1H), 2.97 (m, 1H), 2.85 (ddd,  $J = 14.0, 12.4, 2.4$  Hz, 1H), 2.37 (ddd,  $J = 12.0, 7.2, 1.7$  Hz, 1H), 2.19 (ddd,  $J = 12.0, 3.8, 3.8$  Hz, 1H), 2.09 (ddd,  $J = 11.6, 3.8, 3.8$  Hz, 1H), 2.04—3.11 (m, 3H), 1.78—1.40 (m, 13H), 1.31 (s, 3H), 1.26 (s, 3H), 1.20 (s, 3H), 0.84 (s, 9H), 0.02 (s, 3H), -0.01 (s, 3H);  $^{13}\text{C}$  NMR (150 MHz,  $\text{CDCl}_3$ )  $\delta$  215.3, 88.3, 84.8, 82.2, 81.2, 79.6, 79.4, 78.2, 76.2, 75.7, 73.1, 72.7, 72.2, 72.1, 65.2, 59.9, 53.7, 43.4,

38.8, 37.4, 31.9, 30.0, 28.5, 25.9, 25.8 (3C), 24.2, 24.1, 18.3, 18.2, 16.0, 15.2, -5.3, -5.4; HRMS (ESI) calcd for  $C_{35}H_{59}O_9Si [(M + H)^+]$  651.3923, found 651.3928.

**Enone 20.** To a solution of ketone **19** (531 mg, 0.815 mmol) in THF (20 mL) at -78 °C were added  $Et_3N$  (0.900 mL, 6.52 mmol),  $TMSCl$  (0.830 mL, 2.44 mmol), and LHMDs (1.0 M solution in THF, 2.44 mL, 2.44 mmol), and the resultant solution was stirred at -78 °C for 30 min. The reaction was quenched with pH 7 phosphate buffer, and the mixture was extracted with EtOAc. The organic layer was washed with brine, dried ( $Na_2SO_4$ ), filtered. The filtrate was concentrated under reduced pressure to afford a crude enol silyl ether, which was used in the next reaction without further purification.

To a solution of the above material in  $CH_3CN$  (20 mL) was added  $Pd(OAc)_2$  (548 mg, 2.44 mmol). After being stirred at room temperature for 2 h, the reaction mixture was filtered through a plug of silica gel and concentrated under reduced pressure. Purification of the residue by flash column chromatography on silica gel (20 to 30% EtOAc/hexanes) afforded enone **20** (516 mg, 98% for the two steps) as colorless crystals: mp 118—120 °C (hexanes/EtOAc);  $[\alpha]_D^{27}$  -37.1 ( $c$  0.56,  $CHCl_3$ ); IR (KBr) 2950, 2875, 1665, 1117, 1059, 774  $cm^{-1}$ ;  $^1H$  NMR (600 MHz,  $C_6D_6$ )  $\delta$  6.21 (dd,  $J$  = 12.7, 2.0 Hz, 1H), 5.98 (dd,  $J$  = 12.7, 2.8 Hz, 1H), 4.18 (ddd,  $J$  = 8.9, 2.4, 2.4 Hz, 1H), 4.03 (dd,  $J$  = 4.5, 2.0 Hz, 1H), 3.96 (dd,  $J$  = 11.0, 4.9 Hz, 1H), 3.89 (dd,  $J$  = 10.7, 2.4 Hz, 1H), 3.43—3.34 (m, 4H), 3.17 (dd,  $J$  = 11.6, 3.8 Hz, 1H), 3.15—3.06 (m, 4H), 2.89 (dd,  $J$  = 12.7, 6.2 Hz, 1H), 2.44 (ddd,  $J$  = 12.0, 3.8, 3.8 Hz, 1H), 2.28 (dd,  $J$  = 11.7, 4.5 Hz, 1H), 2.09—1.98 (m, 5H), 1.83—1.52 (m, 6H), 1.50—1.38 (m, 2H), 1.18 (m, 1H), 1.15



(s, 3H), 1.09 (s, 3H), 1.04 (s, 3H), 0.93 (s, 9H), 0.04 (s, 3H), 0.03 (s, 3H);  $^{13}\text{C}$  NMR (150 MHz,  $\text{C}_6\text{D}_6$ )  $\delta$  201.3, 145.1, 128.9, 88.4, 85.3, 81.9, 80.0, 79.6, 79.2, 78.9, 76.8, 76.0, 73.1, 73.0, 72.8 (2C), 65.7, 59.6, 54.2, 44.4, 38.1, 31.9, 29.0, 26.3, 26.0 (3C), 24.7, 24.6, 18.4, 18.2, 15.43, 15.42, -5.19, -5.22; HRMS (ESI) calcd for  $\text{C}_{35}\text{H}_{56}\text{O}_9\text{SiNa}$  [(M + Na) $^+$ ] 671.3586, found 671.3597.

**Alcohol 21.** To a solution of  $\alpha,\beta$ -unsaturated ketone **20** (516 mg, 0.795 mmol) in toluene (20 mL) at  $-78\text{ }^\circ\text{C}$  was added MeMgBr (3.0 M solution in  $\text{Et}_2\text{O}$ , 1.06 mL, 3.18 mmol), and the resultant solution was stirred at  $-78\text{ }^\circ\text{C}$  for 50 min. The reaction was quenched with saturated aqueous  $\text{NH}_4\text{Cl}$  solution, and the mixture was extracted with EtOAc. The organic layer was washed with brine, dried ( $\text{Na}_2\text{SO}_4$ ), filtered, and concentrated under reduced pressure. Purification of the residue by flash column chromatography on silica gel (20 to 40% EtOAc/hexanes) afforded alcohol **21** (495 mg, 94%) as colorless crystals: mp  $125\text{--}127\text{ }^\circ\text{C}$  (hexanes/EtOAc);  $[\alpha]_{\text{D}}^{26} -53.9$  ( $c$  0.57,  $\text{CHCl}_3$ ); IR (KBr) 3473, 2950, 2876, 1088, 1060, 837  $\text{cm}^{-1}$ ;  $^1\text{H}$  NMR (600 MHz,  $\text{CDCl}_3$ )  $\delta$  5.59 (dd,  $J = 13.0, 2.7\text{ Hz}$ , 1H), 5.42 (dd,  $J = 13.0, 1.7\text{ Hz}$ , 1H), 4.21 (s, 1H), 4.10 (m, 1H), 3.78—3.64 (m, 3H), 3.64—3.56 (m, 2H), 3.45 (m, 1H), 3.35 (dd,  $J = 11.6, 5.5\text{ Hz}$ , 1H), 3.30 (ddd,  $J = 11.3, 9.7, 5.2\text{ Hz}$ , 1H), 3.17—3.12 (m, 2H), 3.12—3.05 (m, 2H), 3.02 (dd,  $J = 12.7, 3.8\text{ Hz}$ , 1H), 2.20 (ddd,  $J = 12.4, 4.1, 4.1\text{ Hz}$ , 1H), 2.04—1.94 (m, 4H), 1.90 (d,  $J = 12.7\text{ Hz}$ , 1H), 1.78—1.43 (m, 10H), 1.30 (s, 3H), 1.27 (s, 3H), 1.21 (s, 3H), 0.88 (s, 3H), 0.087 (s, 3H), 0.085 (s, 3H);  $^{13}\text{C}$  NMR (150 MHz,  $\text{C}_6\text{D}_6$ )  $\delta$  139.9, 130.1, 85.2, 84.0, 82.0, 81.9, 80.0, 79.8, 78.9, 76.8, 76.3, 76.1, 73.1, 72.8, 72.2, 72.1,

64.4, 59.6, 54.4, 44.5, 38.2, 32.6, 29.1, 26.4, 25.8 (3C), 24.8, 24.6, 21.7, 18.3, 18.2, 15.6, 15.4, -5.6, -5.7; HRMS (ESI) calcd for C<sub>36</sub>H<sub>60</sub>O<sub>9</sub>SiNa [(M + Na)<sup>+</sup>] 687.3899, found 687.3907.

**Bis-TBS ether 22.** To a solution of alcohol **21** (490 mg, 0.737 mmol) in CH<sub>2</sub>Cl<sub>2</sub> (15 mL) at 0 °C were added Et<sub>3</sub>N (0.500 mL, 3.69 mmol) and TBSOTf (0.500 mL, 2.21 mmol), and the resultant solution was stirred at room temperature for 1.5 h. The reaction was quenched with saturated aqueous NaHCO<sub>3</sub> solution, and the mixture was extracted with EtOAc. The organic layer was washed with brine, dried (Na<sub>2</sub>SO<sub>4</sub>), filtered, and concentrated under reduced pressure. Purification of the residue by flash column chromatography on silica gel (10 to 15% EtOAc/hexanes) gave bis-TBS ether **22** (574 mg, 100%) as colorless crystals: mp 120—122 °C (hexanes/EtOAc); [ $\alpha$ ]<sub>D</sub><sup>23</sup> -16.1 (*c* 0.31, CHCl<sub>3</sub>); IR (KBr) 2952, 2857, 1255, 1084, 836 cm<sup>-1</sup>; <sup>1</sup>H NMR (600 MHz, C<sub>6</sub>D<sub>6</sub>)  $\delta$  5.79 (dd, *J* = 13.1, 2.4 Hz, 1H), 5.72 (dd, *J* = 13.1, 1.7 Hz, 1H), 4.33 (ddd, *J* = 9.7, 2.0, 2.0 Hz, 1H), 4.16 (ddd, *J* = 8.9, 5.5, 5.5 Hz, 1H), 3.77—3.73 (m, 2H), 3.47—3.36 (m, 4H), 3.34 (dd, *J* = 11.3, 5.5 Hz, 1H), 3.18—3.05 (m, 4H), 3.03 (dd, *J* = 12.7, 3.8 Hz, 1H), 2.44 (ddd, *J* = 12.1, 4.4, 4.1 Hz, 1H), 2.39 (ddd, *J* = 12.1, 4.4, 4.1 Hz, 1H), 2.28 (dd, *J* = 11.3, 4.1 Hz, 1H), 2.08—1.94 (m, 5H), 1.86 (ddd, *J* = 11.3, 11.3, 11.3 Hz, 1H), 1.80 (dd, *J* = 11.3, 11.3 Hz, 1H), 1.75 (ddd, *J* = 11.3, 11.3, 11.3 Hz, 1H), 1.67—1.52 (m, 3H), 1.49—1.37 (m, 2H), 1.31 (s, 3H), 1.15 (s, 3H), 1.14 (s, 3H), 1.11 (s, 3H), 1.00 (s, 9H), 0.96 (s, 9H), 0.16 (s, 3H), 0.14 (s, 6H), 0.11 (s, 3H); <sup>13</sup>C NMR (150 MHz, CDCl<sub>3</sub>)  $\delta$  139.3, 129.2, 97.8, 89.1, 84.7, 81.6, 81.2, 79.7, 79.5, 78.2, 78.1, 76.2,

75.8, 73.1, 72.1, 72.0, 63.0, 59.9, 53.8, 43.5, 37.6, 31.8, 29.7, 28.6, 25.9 (3C), 25.7 (3C), 24.3, 24.1, 22.2, 18.3, 18.2, 18.1, 15.6, 15.2, -2.1, -2.3, -5.0, -5.3; HRMS (ESI) calcd for  $C_{42}H_{74}O_9Si_2Na [(M + Na)^+]$  801.4764, found 801. 4765.

**Alcohol 23.** To a solution of bis-TBS ether **22** (35.4 mg, 0.0454 mmol) in MeOH/CH<sub>2</sub>Cl<sub>2</sub> (1:1, v/v, 2 mL) at 0 °C was added CSA (5.3 mg, 0.0227 mmol), and the resultant solution was stirred at 0 °C for 30 min. The reaction was quenched with Et<sub>3</sub>N, and the mixture was concentrated under reduced pressure. Purification of the residue by flash column chromatography on silica gel (30% EtOAc/hexanes) afforded alcohol **23** (29.9 mg, 99%) as colorless crystals: mp 123—125 °C (hexanes/EtOAc);  $[\alpha]_D^{22}$  -16.4 (*c* 0.21, CHCl<sub>3</sub>); IR (KBr) 3421, 2951, 2876, 1083, 1059 cm<sup>-1</sup>; <sup>1</sup>H NMR (600 MHz, CDCl<sub>3</sub>) δ 5.72 (dd, *J* = 13.0, 2.8 Hz, 1H), 5.38 (dd, *J* = 13.0, 2.0 Hz, 1H), 4.15 (ddd, *J* = 9.3, 2.4, 2.4 Hz, 1H), 3.78 (ddd, *J* = 10.7, 10.3, 2.0 Hz, 1H), 3.66 (ddd, *J* = 12.4, 12.4, 3.1 Hz, 1H), 3.58 (dd, *J* = 11.7, 5.2 Hz, 1H), 3.53—3.43 (m, 3H), 3.35 (dd, *J* = 11.3, 5.5 Hz, 1H), 3.30 (ddd, *J* = 11.0, 9.3, 4.8 Hz, 1H), 3.18—3.12 (m, 2H), 3.12—3.04 (m, 2H), 3.02 (dd, *J* = 12.7, 3.8 Hz, 1H), 2.19 (ddd, *J* = 12.4, 4.4 Hz, 1H), 2.06 (ddd, *J* = 11.7, 4.4, 4.1 Hz, 1H), 2.04—1.94 (m, 4H), 1.96 (d, *J* = 13.1 Hz, 1H), 1.78—1.51 (m, 8H), 1.50—1.43 (m, 2H), 1.31 (s, 3H), 1.23 (s, 3H), 1.22 (s, 3H), 1.20 (s, 3H), 0.83 (s, 9H), 0.11 (s, 3H), 0.08 (s, 3H); <sup>13</sup>C NMR (150 MHz, CDCl<sub>3</sub>) δ 139.4, 129.5, 87.3, 84.8, 81.5, 81.2, 79.7, 79.3, 78.2, 78.0, 76.2, 75.8, 73.1, 72.2, 72.0, 71.7, 61.7, 59.8, 53.7, 43.5, 37.4, 31.8, 28.6, 25.9, 25.7 (3C), 24.2, 24.1, 21.8, 18.2, 18.0, 15.6, 15.2, -2.0, -2.3; HRMS (ESI) calcd for  $C_{36}H_{60}O_9SiNa [(M + Na)^+]$  687.3899, found 687.3998.

**Dibromoolefin 24.** To a solution of alcohol **23** (29.9 mg, 0.045 mmol) in CH<sub>2</sub>Cl<sub>2</sub>/DMSO (1:1, v/v, 2 mL) at 0 °C were added Et<sub>3</sub>N (25 μL, 0.18 mmol) and SO<sub>3</sub>·pyridine (25 mg, 0.16 mmol), and the resultant mixture was stirred at 0 °C for 4 h. The reaction mixture was diluted with Et<sub>2</sub>O, washed with saturated aqueous NH<sub>4</sub>Cl solution and brine, dried (Na<sub>2</sub>SO<sub>4</sub>), and filtered. The filtrate was concentrated under reduced pressure to afford a crude aldehyde (40.0 mg), which was used in the next reaction without further purification.

To a solution of CBr<sub>4</sub> (150 mg, 0.45 mmol) in CH<sub>2</sub>Cl<sub>2</sub> (3 mL) at 0 °C was added PPh<sub>3</sub> (235 mg, 0.90 mmol), and the resultant solution was stirred at 0 °C for 15 min. To the solution were added Et<sub>3</sub>N (0.25 mL, 1.8 mmol) and a solution of the above crude aldehyde (40.0 mg) in CH<sub>2</sub>Cl<sub>2</sub> (1 mL) via cannula. The resultant solution was stirred at 0 °C for 30 min. The reaction was quenched with saturated aqueous NaHCO<sub>3</sub> solution, and the resultant mixture was extracted with EtOAc. The organic layer was washed with saturated aqueous NaHCO<sub>3</sub> solution and brine, dried (Na<sub>2</sub>SO<sub>4</sub>), filtered, and concentrated under reduced pressure. Purification of the residue by flash column chromatography on silica gel (10 to 20% EtOAc/hexanes) afforded dibromoolefin **24** (37.2 mg, 100% for the two steps) as a pale yellow amorphous:  $[\alpha]_D^{26} -8.1$  (*c* 1.42, CHCl<sub>3</sub>); IR (KBr) 2950, 2874, 1461, 1377, 1253, 1130, 1082, 1060, 835, 755 cm<sup>-1</sup>; <sup>1</sup>H NMR (600 MHz, C<sub>6</sub>D<sub>6</sub>) δ 6.65 (d, *J* = 7.9 Hz, 1H), 5.82 (dd, *J* = 13.0, 2.8 Hz, 1H), 5.71 (dd, *J* = 13.0, 1.0 Hz, 1H), 4.29 (d, *J* = 9.6 Hz, 1H), 4.25 (d, *J* = 7.9 Hz, 1H), 3.47 (ddd, *J* = 11.2, 11.2, 4.8 Hz, 1H), 3.44—3.34 (m, 4H), 3.16 (dd, *J* = 11.6, 3.8 Hz, 1H),

3.14—3.06 (m, 3H), 3.02 (dd,  $J = 12.7, 3.8$  Hz, 1H), 2.43 (m, 1H), 2.30—2.25 (m, 2H), 2.09—1.97 (m, 4H), 1.82—1.71 (m, 3H), 1.68—1.53 (m, 3H), 1.50—1.39 (m, 2H), 1.29 (s, 3H), 1.21 (m, 1H), 1.14 (s, 3H), 1.12 (s, 6H), 0.95 (s, 9H), 0.09 (s, 3H), 0.07 (s, 3H);  $^{13}\text{C}$  NMR (150 MHz,  $\text{CDCl}_3$ )  $\delta$  139.1, 136.8, 131.2, 128.3, 95.8, 86.6, 85.3, 82.6, 81.9, 80.0, 79.8, 78.9, 78.5, 76.7, 76.1, 73.1, 72.8, 72.32, 72.29, 59.6, 54.5, 44.4, 38.1, 32.2, 29.1, 26.3, 25.9 (3C), 24.8, 24.6, 22.0, 18.3, 15.6, 15.4, -1.9, -2.2; HRMS (ESI) calcd for  $\text{C}_{37}\text{H}_{59}\text{Br}_2\text{O}_8\text{Si}$   $[(\text{M} + \text{H})^+]$  817.2340, found 817.2364.

**(Z)-Vinyl bromide 25.** To a solution of dibromoolefin **24** (13.2 mg, 0.0161 mmol) in benzene (1 mL) were added  $n\text{-Bu}_3\text{SnH}$  (20 mL, 0.081 mmol) and  $\text{Pd}(\text{PPh}_3)_4$  (3.7 mg, 0.0032 mmol). After being stirred at room temperature for 75 min, the reaction mixture was concentrated under reduced pressure. Purification of the residue by flash column chromatography on silica gel (20 to 30%  $\text{Et}_2\text{O}$ /hexanes) afforded (Z)-vinyl bromide **25** (7.9 mg, 66%) as a colorless amorphous:  $[\alpha]_{\text{D}}^{23} +6.4$  ( $c$  0.96,  $\text{CHCl}_3$ ); IR (KBr) 2927, 2854, 1444, 1372, 1080  $\text{cm}^{-1}$ ;  $^1\text{H}$  NMR (600 MHz,  $\text{C}_6\text{D}_6$ )  $\delta$  6.11 (dd,  $J = 7.6, 7.2$  Hz, 1H), 6.03 (d,  $J = 7.2$  Hz, 1H), 5.89 (dd,  $J = 13.2, 2.8$  Hz, 1H), 5.75 (dd,  $J = 13.2, 2.0$  Hz, 1H), 4.51 (d,  $J = 7.6$  Hz, 1H), 4.33 (ddd,  $J = 9.7, 2.4, 2.1$  Hz, 1H), 3.58 (ddd,  $J = 11.0, 9.6, 4.8$  Hz, 1H), 3.43—3.33 (m, 4H), 3.16 (dd,  $J = 11.7, 4.1$  Hz, 1H), 3.14—3.06 (m, 3H), 3.01 (dd,  $J = 12.7, 3.4$  Hz, 1H), 2.43 (ddd,  $J = 12.0, 4.1, 3.8$  Hz, 1H), 2.33 (ddd,  $J = 11.7, 4.1, 4.1$  Hz, 1H), 2.27 (dd,  $J = 11.0, 3.8$  Hz, 1H), 2.09—1.95 (m, 5H), 1.81—1.72 (m, 3H), 1.67—1.52 (m, 3H), 1.48—1.37 (m, 5H), 1.14 (s, 3H), 1.12 (s, 3H), 1.11 (s, 3H), 0.93 (s, 9H), 0.11 (s, 3H), 0.07 (s, 3H);  $^{13}\text{C}$  NMR (150 MHz,  $\text{C}_6\text{D}_6$ )  $\delta$

139.3, 132.8, 131.1, 113.0, 85.1, 84.2, 82.5, 81.9, 80.0, 79.9, 78.9, 78.6, 76.7, 76.1, 73.1, 72.7, 72.5, 72.3, 59.6, 54.5, 44.4, 38.2, 32.4, 29.1, 26.4, 26.0 (3C), 24.7, 24.6, 22.2, 18.33, 18.27, 15.7, 15.4, -1.8, -2.1; HRMS (ESI) calcd for C<sub>37</sub>H<sub>60</sub>BrO<sub>8</sub>Si [(M + H)<sup>+</sup>] 739.3235, found 739.3233.

**Alcohol 26.** To a solution of (*Z*)-vinyl bromide **25** (44.7 mg, 0.0604 mmol) in THF (3 mL) was added HF·pyridine (0.5 mL), and the resultant solution was stirred at room temperature for 17 h. The reaction mixture was carefully poured into saturated aqueous NaHCO<sub>3</sub> solution (20 mL) at 0 °C, and the resultant mixture was extracted with EtOAc. The organic layer was washed with brine, dried (Na<sub>2</sub>SO<sub>4</sub>), filtered and concentrated under reduced pressure. Purification of the residue by flash column chromatography on silica gel (40% EtOAc/hexanes) gave alcohol **26** (37.0 mg, 98%) as a colorless amorphous: [ $\alpha$ ]<sub>D</sub><sup>23</sup> +28.2 (*c* 0.37, CHCl<sub>3</sub>); IR (KBr) 3512, 2945, 2869, 1458, 1380, 1079 cm<sup>-1</sup>; <sup>1</sup>H NMR (600 MHz, CDCl<sub>3</sub>)  $\delta$  6.47 (d, *J* = 7.6 Hz, 1H), 6.22 (dd, *J* = 7.6, 7.6 Hz, 1H), 5.75 (dd, *J* = 13.1, 2.8 Hz, 1H), 5.50 (dd, *J* = 13.1, 1.7 Hz, 1H), 4.36 (d, *J* = 7.9 Hz, 1H), 4.21 (ddd, *J* = 9.6, 2.4, 2.1 Hz, 1H), 3.67 (ddd, *J* = 12.0, 12.0, 3.4 Hz, 1H), 3.59 (dd, *J* = 12.0, 5.1 Hz, 1H), 3.49—3.37 (m, 3H), 3.35 (dd, *J* = 11.6, 5.5 Hz, 1H), 3.17—3.06 (m, 4H), 3.05 (dd, *J* = 12.7, 3.5 Hz, 1H), 2.20 (ddd, *J* = 12.0, 4.4, 3.8 Hz, 1H), 2.12 (ddd, *J* = 11.7, 4.8, 3.8 Hz, 1H), 1.91 (d, *J* = 13.0 Hz, 1H), 1.78—1.41 (m, 13H), 1.314 (s, 3H), 1.309 (s, 3H), 1.22 (s, 3H), 1.21 (s, 3H); <sup>13</sup>C NMR (150 MHz, CDCl<sub>3</sub>)  $\delta$  139.1, 132.3, 131.5, 112.2, 85.2, 84.3, 82.1, 81.9, 80.0, 79.8, 78.9, 76.7, 76.1, 75.8, 73.1, 72.7, 72.4, 72.2, 59.6, 54.4, 44.4, 38.1, 32.3, 29.1, 26.3, 24.7, 24.6, 21.4,

18.2, 15.6, 15.4; HRMS (ESI) calcd for  $C_{31}H_{46}BrO_8$   $[(M + H)^+]$  625.2371, found 625.2377.

**Heptacyclic analogue 2.** To a solution of alcohol **26** (3.4 mg, 0.00543 mmol) and vinyl stannane **27** (51.5 mg, 0.144 mmol) in degassed DMSO/THF (1:1, v/v, 2 mL) were added CuCl (32.0 mg, 0.326 mmol), LiCl (17.0 mg, 0.391 mmol), and  $Pd(PPh_3)_4$  (5.0 mg, 0.0043 mmol). The resultant solution was stirred at 60 °C for 72 h. The reaction was quenched with 3%  $NH_4OH$  solution, and the mixture was extracted with EtOAc. The organic layer was washed with 3%  $NH_4OH$  solution and brine, dried ( $Na_2SO_4$ ), filtered and concentrated under reduced pressure. Purification of the residue by flash column chromatography on silica gel (20 to 30% EtOAc/hexanes) afforded heptacyclic analogue **2** (2.1 mg, 63%) as a colorless amorphous:  $[\alpha]_D^{23} +36.3$  ( $c$  0.20,  $C_6H_6$ ); IR (KBr) 3442, 2929, 2873, 1453, 1383, 1130, 1083, 1061, 835  $cm^{-1}$ ;  $^1H$  NMR (600 MHz,  $C_6D_6$ )  $\delta$  6.51 (ddd,  $J = 11.4, 11.4, 0.6$  Hz, 1H), 6.31 (dd,  $J = 11.4, 11.4$  Hz, 1H), 5.96 (dd,  $J = 13.2, 1.8$  Hz, 1H), 5.80 (dd,  $J = 13.2, 1.8$  Hz, 1H), 5.68 (dddd,  $J = 17.4, 9.6, 6.6, 6.0$  Hz, 1H), 5.51—5.45 (m, 2H), 5.01 (dd,  $J = 17.4, 1.8$  Hz, 1H), 4.96 (dd,  $J = 10.2, 1.8$  Hz, 1H), 4.51 (d,  $J = 6.4$  Hz, 1H), 4.39 (m, 1H), 3.44—3.34 (m, 5H), 3.18 (dd,  $J = 11.4, 4.2$  Hz, 1H), 3.15—3.04 (m, 3H), 3.01 (dd,  $J = 13.2, 3.6$  Hz, 1H), 2.76—2.72 (m, 2H), 2.46 (ddd,  $J = 12.0, 4.2, 3.6$  Hz, 1H), 2.30 (dd,  $J = 11.4, 4.2$  Hz, 1H), 2.11—1.94 (m, 6H), 1.85—1.74 (m, 3H), 1.68—1.52 (m, 4H), 1.48—1.41 (m, 2H), 1.30 (s, 3H), 1.17 (s, 3H), 1.13 (s, 3H), 1.11 (s, 3H);  $^{13}C$  NMR (150 MHz,  $C_6D_6$ )  $\delta$  138.8, 136.2, 131.42, 131.39, 128.5, 127.0, 125.3, 115.4, 85.2, 83.1, 81.9, 81.8, 80.0, 79.9, 78.9, 76.7, 76.3,

76.1, 73.1, 72.8, 72.4, 72.1, 59.6, 54.5, 44.4, 38.1, 32.6, 31.8, 29.0, 26.3, 24.8, 24.6, 21.9, 18.2, 15.6, 15.4; HRMS (ESI) calcd for  $C_{36}H_{53}O_8$   $[(M + H)^+]$  613.3735, found 613.3740.

**Olefin 29.** To a solution of ester **28** (1.29 g, 2.58 mmol) in toluene (30 mL) at  $-78\text{ }^{\circ}\text{C}$  was added DIBALH (0.94 M solution in *n*-hexane, 3.00 mL, 2.82 mmol), and the resultant solution was stirred at  $-78\text{ }^{\circ}\text{C}$  for 20 min. The reaction was quenched with saturated aqueous potassium sodium tartrate solution at  $-78\text{ }^{\circ}\text{C}$ . The resultant mixture was diluted with EtOAc and stirred vigorously at room temperature until the layers became clear. The layers were separated, and the aqueous layer was extracted with EtOAc. The organic layer was washed with brine, dried ( $\text{Na}_2\text{SO}_4$ ), filtered, and concentrated under reduced pressure. The crude aldehyde thus obtained was used in the next reaction without further purification.

To a suspension of  $\text{Ph}_3\text{P}^+\text{CH}_3\text{Br}^-$  (2.77 g, 7.75 mmol) in THF (20 mL) at  $0\text{ }^{\circ}\text{C}$  was added NaHMDS (1.0 M solution in THF, 7.20 mL, 7.20 mmol), and the resultant suspension was stirred at  $0\text{ }^{\circ}\text{C}$  for 20 min. To this suspension was added a solution of the above aldehyde in THF (5 mL + 5 mL rinse), and the resultant mixture was stirred at  $0\text{ }^{\circ}\text{C}$  for 30 min. The reaction was quenched with saturated aqueous  $\text{NH}_4\text{Cl}$  solution at  $0\text{ }^{\circ}\text{C}$ . The resultant mixture was diluted with EtOAc, washed with  $\text{H}_2\text{O}$  and brine, dried ( $\text{Na}_2\text{SO}_4$ ), filtered, and concentrated under reduced pressure. Purification of the residue by flash chromatography on silica gel (5 to 10% EtOAc/hexanes) gave olefin **29** (1.18 g, 100% for the two steps) as colorless crystals: mp  $131\text{--}133\text{ }^{\circ}\text{C}$  (hexanes/EtOAc);  $[\alpha]_D^{23}$



−12.5 (*c* 0.61, benzene); IR (KBr) 3434, 2978, 2940, 2871, 1116, 1094  $\text{cm}^{-1}$ ;  $^1\text{H}$  NMR (500 MHz,  $\text{C}_6\text{D}_6$ )  $\delta$  6.13 (m, 1H), 5.22 (dd,  $J = 17.5, 1.5$  Hz, 1H), 5.13 (d,  $J = 10.5$  Hz, 1H), 3.94 (dd,  $J = 11.5, 5.5$  Hz, 1H), 3.71 (m, 1H), 3.64 (dd,  $J = 11.5, 9.5$  Hz, 1H), 3.48 (dd,  $J = 9.0, 4.0$  Hz, 1H), 3.44 (dd,  $J = 11.0, 2.5$  Hz, 1H), 3.25 (ddd,  $J = 9.5, 9.0, 5.5$  Hz, 1H), 2.99 (dd,  $J = 12.5, 3.5$  Hz, 1H), 2.89 (m, 1H), 2.52 (dd,  $J = 14.0, 7.5$  Hz, 1H), 2.21 (m, 1H), 2.10 (d,  $J = 12.0$  Hz, 1H), 2.04 (ddd,  $J = 11.5, 5.0, 3.5$  Hz, 1H), 2.00—1.90 (m, 3H), 1.81—1.72 (m, 2H), 1.69 (ddd,  $J = 12.0, 12.0, 12.0$  Hz, 1H), 1.46 (s, 3H), 1.29 (s, 3H), 1.20 (s, 3H), 1.14 (s, 3H), 0.10 (s, 9H);  $^{13}\text{C}$  NMR (125 MHz,  $\text{C}_6\text{D}_6$ )  $\delta$  136.9, 116.1, 98.4, 87.9, 81.0, 80.5, 75.9, 74.3, 73.3, 73.1, 71.9, 63.5, 55.3, 33.7, 33.3, 30.2, 29.8, 28.9, 25.1, 19.4, 16.0, 2.7 (3C): HRMS (ESI) calcd for  $\text{C}_{24}\text{H}_{42}\text{O}_6\text{SiNa}$  [(M + Na) $^+$ ] 477.2643, found 477.2633.

**Diene 30.** To a solution of olefin **29** (1.15 g, 2.53 mmol) in THF (25 mL) was added TBAF (1.0 M solution in THF, 7.60 mL, 7.60 mmol), and the resultant solution was stirred at room temperature for 35 min. The reaction mixture was concentrated under reduced pressure, and the residue was purified by flash chromatography on silica gel (40 to 50% EtOAc/hexanes) to give an alcohol, which was used in the next reaction without further purification.

To a suspension of KH (30% in mineral oil, 1.00 g) in THF (10 mL) at 0 °C was added a solution of the above alcohol in THF (10 mL + 5 mL rinse), and the resultant mixture was stirred at 0 °C for 10 min. To the mixture was added allyl bromide (0.292 mL, 3.37 mmol), and the resultant mixture was stirred at room temperature for 3.5 h.

The reaction was quenched with MeOH and saturated aqueous  $\text{NH}_4\text{Cl}$  solution. The resultant mixture was extracted with EtOAc, and the organic layer was washed with  $\text{H}_2\text{O}$  and brine, dried ( $\text{Na}_2\text{SO}_4$ ), filtered, and concentrated under reduced pressure. Purification of the residue by flash chromatography on silica gel (5 to 15% EtOAc/hexanes) gave diene **30** (1.02 g, 96% for the two steps) as a colorless oil:  $[\alpha]_{\text{D}}^{23}$   $-13.0$  ( $c$  0.32, benzene); IR (KBr) 1638, 1109, 1078, 1019, 700  $\text{cm}^{-1}$ ;  $^1\text{H}$  NMR (600 MHz,  $\text{C}_6\text{D}_6$ )  $\delta$  6.13 (m, 1H), 5.81 (m, 1H), 5.24 (dd,  $J = 16.8, 1.2$  Hz, 1H), 5.19 (d,  $J = 17.4$  Hz, 1H), 5.12 (d,  $J = 9.6$  Hz, 1H), 5.02 (dd,  $J = 10.8, 1.8$  Hz, 1H), 3.95 (dd,  $J = 11.4, 5.4$  Hz, 1H), 3.75—3.60 (m, 4H), 3.51 (dd,  $J = 10.2, 1.8$  Hz, 1H), 3.47 (ddd,  $J = 9.0, 8.4, 3.6$  Hz, 1H), 3.26 (ddd,  $J = 9.0, 9.0, 6.0$  Hz, 1H), 2.92 (dd,  $J = 12.6, 3.6$  Hz, 1H), 2.86 (ddd,  $J = 10.2, 9.0, 4.8$  Hz, 1H), 2.56 (dd,  $J = 14.4, 7.2$  Hz, 1H), 2.20 (m, 1H), 2.04—1.92 (m, 4H), 1.83—1.74 (m, 3H), 1.68 (ddd,  $J = 12.6, 12.0, 12.0$  Hz, 1H), 1.47 (s, 3H), 1.29 (s, 3H), 1.11 (s, 3H), 1.06 (s, 3H);  $^{13}\text{C}$  NMR (150 MHz,  $\text{C}_6\text{D}_6$ )  $\delta$  136.7, 136.2, 116.1, 114.9, 98.3, 86.3, 80.9, 80.2, 75.7, 74.6, 73.2, 73.0, 71.8, 63.3, 62.1, 50.4, 33.8, 32.1, 30.1, 29.8, 28.8, 20.7, 19.2, 15.9; HRMS (ESI) calcd for  $\text{C}_{24}\text{H}_{38}\text{O}_6\text{Na}$   $[(\text{M} + \text{Na})^+]$  445.2561, found 445.2551.

**Oxepene 31.** To a solution of diene **30** (0.70 g, 1.7 mmol) in  $\text{CH}_2\text{Cl}_2$  (66 mL) was added the Grubbs first-generation catalyst (136.6 mg, 0.1660 mmol), and the resultant solution was stirred at room temperature for 7 h. The reaction was quenched with  $\text{Et}_3\text{N}$ , and the resultant mixture was concentrated under reduced pressure. Purification of the residue by flash chromatography on silica gel (10 to 20% EtOAc/hexanes) gave

oxepene **31** (0.58 g, 89%) as a colorless solid:  $[\alpha]_D^{23} +19.8$  ( $c$  0.49, benzene); IR (KBr) 2941, 2872, 1517, 1250, 1093, 828  $\text{cm}^{-1}$ ;  $^1\text{H}$  NMR (600 MHz,  $\text{CDCl}_3$ )  $\delta$  5.57—5.46 (m, 2H), 4.22—4.10 (m, 2H), 3.86 (dd,  $J = 11.4, 5.4$  Hz, 1H), 3.72 (m, 1H), 3.57 (dd,  $J = 11.4, 9.0$  Hz, 1H), 3.50—3.42 (m, 2H), 3.34 (ddd,  $J = 9.6, 9.0, 6.0$  Hz, 1H), 3.25 (ddd,  $J = 10.8, 9.0, 4.8$  Hz, 1H), 3.09 (dd,  $J = 12.6, 3.6$  Hz, 1H), 2.50 (m, 1H), 2.18 (m, 1H), 2.09—1.99 (m, 2H), 1.84—1.69 (m, 3H), 1.57 (m, 1H), 1.42 (s, 3H), 1.35 (s, 3H), 1.27 (s, 3H), 1.23 (s, 3H);  $^{13}\text{C}$  NMR (150 MHz,  $\text{CDCl}_3$ )  $\delta$  129.9, 123.2, 98.5, 85.0, 80.9, 79.4, 75.7, 75.5, 72.72, 72.65, 71.8, 63.2, 62.8, 53.0, 32.2, 31.8, 29.7, 29.3, 28.4, 19.5, 16.4, 16.1; HRMS (ESI) calcd for  $\text{C}_{22}\text{H}_{34}\text{O}_6\text{Na}$   $[(\text{M} + \text{Na})^+]$  417.2248, found 417.2250.

**Pentacycle 32.** To a solution of oxepene **31** (77.4 mg, 0.196 mmol) in EtOAc (10 mL) were added  $\text{Et}_3\text{N}$  (0.060 mL, 0.43 mmol) and 10% Pd/C (24 mg), and the resultant suspension was stirred at room temperature under an atmosphere of hydrogen (ballon) overnight. The suspension was filtered through a pad of Celite<sup>®</sup>, and the filtrate was concentrated under reduced pressure to give pentacycle **32** (76.8 mg, 99%) as colorless crystals: mp 147—148 °C (hexanes/EtOAc);  $[\alpha]_D^{23} +4.7$  ( $c$  0.24, benzene); IR (KBr) 2950, 2875, 1081, 1057  $\text{cm}^{-1}$ ;  $^1\text{H}$  NMR (500 MHz,  $\text{CDCl}_3$ )  $\delta$  3.85 (dd,  $J = 11.5, 5.5$  Hz, 1H), 3.74—3.64 (m, 3H), 3.57 (dd,  $J = 11.5, 9.0$  Hz, 1H), 3.47 (ddd,  $J = 9.0, 9.0, 4.0$  Hz, 1H), 3.41 (dd,  $J = 10.5, 3.5$  Hz, 1H), 3.33 (ddd,  $J = 9.5, 9.0, 6.0$  Hz, 1H), 3.23 (ddd,  $J = 10.5, 9.0, 5.0$  Hz, 1H), 3.05 (dd,  $J = 12.5, 3.5$  Hz, 1H), 2.06 (m, 1H), 2.01 (m, 1H), 1.96—1.85 (m, 3H), 1.82—1.52 (m, 9H), 1.41 (s, 3H), 1.34 (s, 3H), 1.29 (s, 3H), 1.21 (s, 3H);  $^{13}\text{C}$  NMR (125 MHz,  $\text{CDCl}_3$ )  $\delta$  98.5, 86.0, 80.9, 80.3, 76.0, 75.7, 72.7, 72.6, 71.9,

64.2, 63.2, 53.6, 31.8, 29.9, 29.7, 29.3, 29.2, 28.4, 22.0, 19.53, 19.49, 16.1; HRMS (ESI) calcd for  $C_{22}H_{36}O_6Na [(M + Na)^+]$  419.2404, found 419.2395.

**Ketone 33.** To a solution of pentacycle **32** (76.8 mg, 0.194 mmol) in MeOH/ $CHCl_3$  (2:1, v/v, 6 mL) was added CSA (10 mg), and the resultant solution was stirred at room temperature for 1.5 h. The reaction was quenched with  $Et_3N$ , and the resultant mixture was concentrated under reduced pressure. The residue was passed through a pad of silica gel (eluted with 5% MeOH/ $CHCl_3$ ) to give a diol, which was used in the next reaction without further purification.

To a solution of the above diol in DMF (6 mL) at 0 °C were added imidazole (132.0 mg, 1.939 mmol) and TBSCl (87.7 mg, 0.582 mmol), and the resultant solution was stirred at 0 °C for 1 h. The reaction was quenched with saturated aqueous  $NaHCO_3$  solution. The resultant mixture was diluted with EtOAc, washed with  $H_2O$  and brine, dried ( $Na_2SO_4$ ), filtered, and concentrated under reduced pressure. Purification of the residue by flash chromatography on silica gel (30 to 45% EtOAc/hexanes) gave an alcohol, which was used in the next reaction without further purification..

To a solution of the above alcohol in  $CH_2Cl_2$  (6 mL) were added 4 Å molecular sieves (100 mg), NMO (113.6 mg, 0.9697 mmol), and TPAP (ca. 10 mg). The resultant mixture was stirred at room temperature for 80 min and then filtered through a pad of silica gel (eluted with EtOAc). The filtrate was concentrated under reduced pressure to give ketone **33** (82.0 mg, 90% for the three steps) as a colorless oil:  $[\alpha]_D^{23} +54.7$  ( $c$  0.20, benzene); IR (KBr) 2952, 2873, 1714, 1081, 838  $cm^{-1}$ ;  $^1H$  NMR (500 MHz,  $C_6D_6$ )  $\delta$

3.84 (dd,  $J = 10.5, 4.0$  Hz, 1H), 3.76 (dd,  $J = 10.5, 2.5$  Hz, 1H), 3.67—3.54 (m, 3H), 3.50—3.41 (m, 2H), 2.95 (dd,  $J = 12.5, 3.5$  Hz, 1H), 2.78—2.66 (m, 2H), 2.30 (m, 1H), 2.13 (m, 1H), 2.12 (d,  $J = 12.5$  Hz, 1H), 2.06 (d,  $J = 12.5$  Hz, 1H), 1.97 (m, 1H), 1.85 (m, 1H), 1.80 (ddd,  $J = 13.0, 11.5, 11.0$  Hz, 1H), 1.59 (m, 1H), 1.50—1.35 (m, 3H), 1.34—1.22 (m, 2H), 1.17 (s, 3H), 1.15 (s, 3H), 0.92 (s, 9H), 0.02 (s, 3H), 0.01 (s, 3H);  $^{13}\text{C}$  NMR (125 MHz,  $\text{C}_6\text{D}_6$ )  $\delta$  213.3, 88.5, 86.6, 82.6, 80.6, 76.1, 73.3, 72.3, 65.6, 64.2, 54.5, 39.2, 32.5, 30.4, 30.2, 29.5, 26.0 (3C), 22.2, 19.3, 18.5, 16.3, -5.2, -5.4; HRMS (ESI) calcd for  $\text{C}_{25}\text{H}_{44}\text{O}_6\text{SiNa}$   $[(\text{M} + \text{Na})^+]$  491.2799, found 491.2791.

**Alcohol 34.** To a solution of ketone **33** (82.0 mg, 0.175 mmol) in THF (5 mL) at -78 °C were added  $\text{Et}_3\text{N}$  (0.243 mL, 1.751 mmol),  $\text{TMSCl}$  (0.223 mL, 1.745 mmol), and LHMDS (1.0 M solution in THF, 0.524 mL, 0.524 mmol), and the resultant solution was stirred at -78 °C for 30 min. The reaction was quenched with aqueous pH 7 buffer solution. The resultant mixture was extracted with EtOAc, and the organic layer was washed with brine, dried ( $\text{Na}_2\text{SO}_4$ ), filtered, and concentrated under reduced pressure to give an enol silane. This material was immediately used in the next reaction without further purification.

To a solution of the above enol silane in  $\text{CH}_3\text{CN}$  (5 mL) was added  $\text{Pd}(\text{OAc})_2$  (117.5 mg, 0.5234 mmol), and the resultant mixture was stirred at room temperature for 40 min. Insoluble materials were filtered off, and the filtrate was concentrated under reduced pressure. Purification of the residue by flash chromatography on silica gel (15%

EtOAc/hexanes) gave an enone, which was used in the next reaction without further purification.

To a solution of the above enone in toluene (5 mL) at  $-78\text{ }^{\circ}\text{C}$  was added MeMgBr (3.0 M solution in Et<sub>2</sub>O, 0.175 mL, 0.525 mmol), and the resultant solution was stirred at  $-78\text{ }^{\circ}\text{C}$  for 0.5 h. The reaction was quenched with saturated aqueous NH<sub>4</sub>Cl solution. The resultant mixture was diluted with EtOAc, washed with H<sub>2</sub>O and brine, dried (Na<sub>2</sub>SO<sub>4</sub>), filtered, and concentrated under reduced pressure. Purification of the residue by flash chromatography on silica gel (20 to 25% EtOAc/hexanes) gave alcohol **34** (88.9 mg, 100% for the three steps) as a colorless oil:  $[\alpha]_{\text{D}}^{23} -8.0$  (*c* 0.70, benzene); IR (KBr) 3473, 2950, 2875, 1088, 1060, 836 cm<sup>-1</sup>; <sup>1</sup>H NMR (500 MHz, C<sub>6</sub>D<sub>6</sub>)  $\delta$  5.87 (dd, *J* = 12.5, 2.5 Hz, 1H), 5.78 (d, *J* = 12.5 Hz, 1H), 4.34 (d, *J* = 9.5 Hz, 1H), 3.89 (dd, *J* = 10.0, 7.5 Hz, 1H), 3.81—3.73 (m, 2H), 3.65—3.58 (m, 2H), 3.48—3.40 (m, 2H), 3.37 (ddd, *J* = 11.5, 10.5, 5.5 Hz, 1H), 3.07 (dd, *J* = 12.5, 3.0 Hz, 1H), 2.20—2.10 (m, 3H), 1.92 (m, 1H), 1.82 (ddd, *J* = 12.0, 12.0, 11.5 Hz, 1H), 1.58 (m, 1H), 1.49—1.37 (m, 5H), 1.33—1.22 (m, 2H), 1.18 (s, 3H), 1.17 (s, 3H), 0.89 (s, 9H),  $-0.016$  (s, 3H),  $-0.023$  (s, 3H); <sup>13</sup>C NMR (150 MHz, C<sub>6</sub>D<sub>6</sub>)  $\delta$  139.8, 130.2, 86.5, 84.1, 82.1, 80.5, 76.3, 76.1, 72.3, 64.4, 64.1, 54.4, 32.7, 30.2, 29.5, 25.8 (3C), 22.2, 21.7, 19.4, 18.2, 15.9,  $-5.6$ ,  $-5.7$  (one carbon missing presumably due to overlapping of signals); HRMS (ESI) calcd for C<sub>26</sub>H<sub>46</sub>O<sub>6</sub>SiNa [(M + Na)<sup>+</sup>] 505.2956, found 505.2931.

**Dibromoolefin 35.** To a solution of alcohol **34** (740 mg, 1.54 mmol) in THF (15 mL) was added TBAF (1.0 M solution in THF, 4.62 mL, 4.62 mmol), and the resultant

solution was stirred at room temperature overnight. The reaction mixture was concentrated under reduced pressure, and the residue was purified by flash chromatography on silica gel (50 to 80% EtOAc/hexanes) to give a diol (505 mg, 89%) as a colorless oil:  $^1\text{H}$  NMR (500 MHz,  $\text{CDCl}_3$ )  $\delta$  5.64 (dd,  $J = 13.0, 3.0$  Hz, 1H), 5.47 (d,  $J = 13.0$  Hz, 1H), 4.17 (d,  $J = 10.0$  Hz, 1H), 3.80 (dd,  $J = 11.0, 5.0$  Hz, 1H), 3.74—3.63 (m, 2H), 3.59 (dd,  $J = 11.5, 9.0$  Hz, 1H), 3.54 (dd,  $J = 7.0, 4.5$  Hz, 1H), 3.40 (dd,  $J = 11.0, 4.0$  Hz, 1H), 3.33 (ddd,  $J = 11.0, 9.5, 5.0$  Hz, 1H), 3.05 (dd,  $J = 12.5, 3.5$  Hz, 1H), 2.92—2.40 (br m, 2H), 2.08 (ddd,  $J = 11.5, 4.5, 4.0$  Hz, 1H), 1.94—1.84 (m, 2H), 1.74—1.56 (m, 7H), 1.30 (s, 3H), 1.24 (s, 3H), 1.22 (s, 3H);  $^{13}\text{C}$  NMR (125 MHz,  $\text{CDCl}_3$ )  $\delta$  139.1, 130.5, 86.1, 85.7, 81.6, 80.0, 76.1, 75.7, 72.1, 71.6, 64.2, 62.1, 53.4, 31.9, 29.8, 29.1, 21.9, 20.8, 19.4, 15.7.

To a solution of the above diol (505 mg, 1.37 mmol) in  $\text{CH}_2\text{Cl}_2/\text{DMSO}$  (4:1, v/v, 15 mL) was added  $\text{Et}_3\text{N}$  (0.95 mL, 6.8 mmol), and the solution was cooled to 0 °C. To this solution was added  $\text{SO}_3 \cdot \text{pyridine}$  complex (0.87 g, 5.5 mmol), and the resultant solution was stirred at 0 °C for 2 h. The reaction mixture was diluted with EtOAc, washed with 1 M aqueous HCl solution, saturated aqueous  $\text{NaHCO}_3$  solution and brine, dried ( $\text{Na}_2\text{SO}_4$ ), filtered, and concentrated under reduced pressure. The crude aldehyde thus obtained was used in the next reaction without further purification.

To a solution of  $\text{CBr}_4$  (1.36 g, 4.10 mmol) in  $\text{CH}_2\text{Cl}_2$  (10 mL) at 0 °C was added  $\text{Ph}_3\text{P}$  (2.16 g, 8.22 mmol), and the resultant solution was stirred at 0 °C for 20 min. To this solution were added  $\text{Et}_3\text{N}$  (1.53 mL, 11.0 mmol) and a solution of the above crude

aldehyde (5 mL + 5 mL rinse), and the resultant solution was stirred at 0 °C for 25 min. The reaction was quenched with saturated aqueous NaHCO<sub>3</sub> solution. The resultant mixture was diluted with EtOAc, washed with saturated aqueous NaHCO<sub>3</sub> solution and brine, dried (Na<sub>2</sub>SO<sub>4</sub>), filtered, and concentrated under reduced pressure. Purification of the residue by flash chromatography on silica gel (20 to 40% EtOAc/hexanes) gave dibromoolefin **35** (662.1 mg, 93% for the two steps) as a colorless oil:  $[\alpha]_D^{22} +20.8$  (*c* 0.19, benzene); IR (KBr) 3421, 2951, 2876, 1083, 1059 cm<sup>-1</sup>; <sup>1</sup>H NMR (500 MHz, C<sub>6</sub>D<sub>6</sub>)  $\delta$  6.57 (m, 1H), 5.70 (d, *J* = 13.0 Hz, 1H), 5.57 (m, 1H), 4.27 (d, *J* = 9.5 Hz, 1H), 4.13 (dd, *J* = 7.5, 1.5 Hz, 1H), 3.61 (ddd, *J* = 12.5, 7.0, 3.5 Hz, 1H), 3.48—3.34 (m, 3H), 3.03 (d, *J* = 13.0 Hz, 1H), 2.22 (m, 1H), 2.16—2.08 (m, 2H), 1.94 (m, 1H), 1.75 (ddd, *J* = 12.0, 12.0, 11.5 Hz, 1H), 1.58 (m, 1H), 1.50—1.38 (m, 2H), 1.34—1.22 (m, 3H), 1.17 (s, 3H), 1.13 (s, 3H), 1.10 (s, 3H); <sup>13</sup>C NMR (150 MHz, C<sub>6</sub>D<sub>6</sub>)  $\delta$  138.8, 136.2, 131.7, 95.2, 86.5, 86.4, 82.5, 80.5, 76.1, 75.5, 72.4, 72.2, 64.2, 54.4, 32.3, 30.2, 29.5, 22.2, 21.2, 19.4, 15.8; HRMS (ESI) calcd for C<sub>21</sub>H<sub>30</sub>Br<sub>2</sub>O<sub>5</sub>Na [(M + Na)<sup>+</sup>] 543.0352, found 543.0342.

**Silyl ether 36.** To a solution of dibromoolefin **35** (46.2 mg, 0.0888 mmol) in CH<sub>2</sub>Cl<sub>2</sub> (4 mL) at 0 °C were added 2,6-lutidine (0.100 mL, 0.859 mmol) and TMSOTf (0.080 mL, 0.44 mmol), and the resultant solution was stirred at 0 °C for 30 min. The reaction was quenched with H<sub>2</sub>O. The resultant mixture was extracted with EtOAc, and the organic layer was washed with 1 M aqueous HCl solution, saturated aqueous NaHCO<sub>3</sub> solution and brine, dried (Na<sub>2</sub>SO<sub>4</sub>), filtered, and concentrated under reduced pressure.



Purification of the residue by flash chromatography on silica gel (10% EtOAc/hexanes) gave silyl ether **36** (52.6 mg, 100%) as a colorless oil:  $[\alpha]_D^{22} +23.5$  ( $c$  0.26, benzene); IR (KBr) 2950, 2874, 1377, 1253, 1130, 1060, 835  $\text{cm}^{-1}$ ;  $^1\text{H}$  NMR (500 MHz,  $\text{C}_6\text{D}_6$ )  $\delta$  6.65 (d,  $J = 9.0$  Hz, 1H), 5.81 (dd,  $J = 13.0, 2.5$  Hz, 1H), 5.73 (dd,  $J = 13.0, 1.5$  Hz, 1H), 4.32—4.27 (m, 2H), 3.61 (ddd,  $J = 12.5, 6.5, 3.5$  Hz, 1H), 3.48—3.38 (m, 3H), 2.99 (dd,  $J = 12.5, 3.5$  Hz, 1H), 2.21 (ddd,  $J = 11.5, 4.5, 4.0$  Hz, 1H), 2.14 (d,  $J = 12.5$  Hz, 1H), 2.12 (d,  $J = 12.5$  Hz, 1H), 1.93 (m, 1H), 1.77 (ddd,  $J = 12.0, 12.0, 12.0$  Hz, 1H), 1.58 (m, 1H), 1.48—1.37 (m, 2H), 1.34—1.22 (m, 2H), 1.17 (s, 3H), 1.15 (s, 3H), 0.14 (s, 9H);  $^{13}\text{C}$  NMR (125 MHz,  $\text{C}_6\text{D}_6$ )  $\delta$  139.4, 136.9, 131.0, 86.7, 86.5, 82.6, 80.4, 79.0, 76.1, 72.41, 72.37, 64.2, 54.4, 32.3, 30.3, 29.5, 22.2, 22.0, 19.4, 15.8, 2.4 (3C); HRMS (ESI) calcd for  $\text{C}_{24}\text{H}_{38}\text{Br}_2\text{O}_5\text{SiNa}$   $[(\text{M} + \text{Na})^+]$  615.0747, found 615.0749.

**(Z)-Vinyl bromide 37.** To a solution of silyl ether **36** (91.2 mg, 0.154 mmol) in benzene (5 mL) were added  $n\text{-Bu}_3\text{SnH}$  (0.083 mL, 0.31 mmol) and  $\text{Pd}(\text{PPh}_3)_4$  (17.8 mg, 0.015 mmol), and the resultant mixture was stirred at room temperature for 1 h. The reaction mixture was concentrated under reduced pressure, and the residue was purified by flash chromatography on silica gel (12 to 15%  $\text{Et}_2\text{O}$ /hexanes) gave (Z)-vinyl bromide **37** (70.2 mg, 89%) as a colorless oil:  $[\alpha]_D^{22} +41.9$  ( $c$  1.35, benzene); IR (KBr) 2928, 2856, 1460, 1377, 1082  $\text{cm}^{-1}$ ;  $^1\text{H}$  NMR (500 MHz,  $\text{C}_6\text{D}_6$ )  $\delta$  6.10 (dd,  $J = 7.5, 7.5$  Hz, 1H), 6.03 (d,  $J = 7.5$  Hz, 1H), 5.90 (dd,  $J = 13.0, 2.5$  Hz, 1H), 5.78 (dd,  $J = 13.0, 1.5$  Hz, 1H), 4.59 (d,  $J = 7.5$  Hz, 1H), 4.35 (m, 1H), 3.61 (ddd,  $J = 12.5, 7.0, 3.5$  Hz, 1H), 3.55 (ddd,  $J = 11.0, 10.0, 5.0$  Hz, 1H), 3.44 (ddd,  $J = 10.5, 8.0, 3.0$  Hz, 1H), 3.39 (dd,  $J =$

11.5, 4.0 Hz, 1H), 2.99 (dd,  $J = 12.5, 3.5$  Hz, 1H), 2.27 (ddd,  $J = 12.0, 4.5, 4.5$  Hz, 1H), 2.16 (d,  $J = 12.5$  Hz, 1H), 2.12 (d,  $J = 12.5$  Hz, 1H), 1.92 (m, 1H), 1.81 (ddd,  $J = 13.0, 11.5, 11.0$  Hz, 1H), 1.56 (m, 1H), 1.50—1.35 (m, 5H), 1.34—1.22 (m, 2H), 1.17 (s, 3H), 1.16 (s, 3H), 0.16 (s, 9H);  $^{13}\text{C}$  NMR (125 MHz,  $\text{C}_6\text{D}_6$ )  $\delta$  139.4, 132.9, 131.0, 112.1, 86.3, 84.4, 82.5, 80.4, 79.1, 76.1, 72.6, 72.4, 64.1, 54.4, 32.5, 30.3, 29.5, 22.3, 22.2, 19.5, 15.9, 2.5 (3C); HRMS (ESI) calcd for  $\text{C}_{24}\text{H}_{39}\text{BrO}_5\text{SiNa}$   $[(\text{M} + \text{Na})^+]$  537.1642, found 537.1633.

**Alcohol 38.** To a solution of (Z)-vinyl bromide **37** (120.6 mg, 0.2346 mmol) in THF (5 mL) at 0 °C was added HF·pyridine complex (1.5 mL), and the resultant solution was stirred at room temperature overnight. The reaction was quenched with saturated aqueous  $\text{NaHCO}_3$  solution at 0 °C. The resultant mixture was extracted with EtOAc, and the organic layer was washed with brine, dried ( $\text{Na}_2\text{SO}_4$ ), filtered, and concentrated under reduced pressure. Purification of the residue by flash chromatography on silica gel (30% EtOAc/hexanes) gave alcohol **38** (97.4 mg, 94%) as a colorless amorphous solid:  $[\alpha]_{\text{D}}^{22} +78.8$  ( $c$  0.70, benzene); IR (KBr) 3510, 2947, 2873, 1458, 1379, 1079  $\text{cm}^{-1}$ ;  $^1\text{H}$  NMR (500 MHz,  $\text{C}_6\text{D}_6$ )  $\delta$  5.97—5.72 (m, 2H), 5.75 (d,  $J = 12.5$  Hz, 1H), 5.71 (dd,  $J = 12.5, 2.5$  Hz, 1H), 4.46 (m, 1H), 4.33 (d,  $J = 10.0$  Hz, 1H), 3.61 (m, 1H), 3.48—3.37 (m, 3H), 2.99 (dd,  $J = 12.5, 3.5$  Hz, 1H), 2.18 (ddd,  $J = 11.5, 4.5, 4.0$  Hz, 1H), 2.15 (d,  $J = 12.5$  Hz, 1H), 2.11 (d,  $J = 12.5$  Hz, 1H), 1.91 (m, 1H), 1.76 (ddd,  $J = 12.0, 12.0, 11.5$  Hz, 1H), 1.57 (m, 1H), 1.50—1.38 (m, 2H), 1.33—1.22 (m, 5H), 1.20 (s, 1H), 1.17 (s, 3H), 1.14 (s, 3H);  $^{13}\text{C}$  NMR (125 MHz,  $\text{CDCl}_3$ )  $\delta$  138.4, 131.9, 131.5,

113.0, 86.4, 84.1, 82.0, 80.4, 76.2, 76.2, 72.4, 72.0, 64.5, 53.8, 32.2, 30.2, 29.5, 22.2, 21.6, 19.8, 16.0; HRMS (ESI) calcd for  $C_{21}H_{31}BrO_5Na [(M + Na)^+]$  465.1247, found 465.1226.

**Tetracyclic analogue 3.** To a solution of alcohol **38** (37.6 mg, 0.0851 mmol) and vinyl stannane **27** (91.4 mg) in THF/DMSO (1:1, v/v, 2 mL, degassed by purging  $N_2$  gas) were added LiCl (43.3 mg, 1.02 mmol), CuCl (84.2 mg, 0.851 mmol), and  $Pd(PPh_3)_4$  (29.5 mg, 0.0255 mmol), and the resultant mixture was stirred at 60 °C for two days. The reaction was quenched with 3%  $NH_4OH$  solution at room temperature. The resultant mixture was stirred at room temperature for a while and then filtered through a pad of Celite<sup>®</sup>. The filtrate was diluted with EtOAc, washed with 3%  $NH_4OH$  solution and brine, dried ( $Na_2SO_4$ ), filtered, and concentrated under reduced pressure. Purification of the residue by flash chromatography on silica gel (25% EtOAc/hexanes) gave tetracyclic analogue **3** (20.4 mg, 56%) as a colorless amorphous solid:  $[\alpha]_D^{23} +97.0$  ( $c$  0.40, benzene); IR (KBr) 3442, 2928, 2873, 1457, 1382, 1130, 1082, 1060  $cm^{-1}$ ;  $^1H$  NMR (500 MHz,  $C_6D_6$ )  $\delta$  6.51 (dd,  $J = 11.5, 11.0$  Hz, 1H), 6.30 (dd,  $J = 11.5, 11.5$  Hz, 1H), 5.94 (dd,  $J = 13.0, 2.5$  Hz, 1H), 5.82 (dd,  $J = 13.0, 1.5$  Hz, 1H), 5.67 (m, 1H), 5.51—5.44 (m, 2H), 5.03—4.92 (m, 2H), 4.51 (d,  $J = 9.0$  Hz, 1H), 4.40 (m, 1H), 3.61 (ddd,  $J = 13.0, 6.5, 4.0$  Hz, 1H), 3.48—3.40 (m, 2H), 3.36 (ddd,  $J = 11.0, 9.5, 5.0$  Hz, 1H), 3.03 (dd,  $J = 13.0, 4.0$  Hz, 1H), 2.76—2.70 (m, 2H), 2.16 (d,  $J = 12.5$  Hz, 1H), 2.13 (d,  $J = 12.5$  Hz, 1H), 2.10 (ddd,  $J = 12.0, 4.5, 4.5$  Hz, 1H), 1.90 (m, 1H), 1.79 (ddd,  $J = 12.0, 12.0, 12.0$  Hz, 1H), 1.55 (m, 1H), 1.48—1.35 (m, 2H), 1.33—1.21 (m, 8H),

1.17 (s, 3H);  $^{13}\text{C}$  NMR (125 MHz,  $\text{C}_6\text{D}_6$ )  $\delta$  138.7, 136.2, 131.5, 131.4, 128.6, 127.0, 125.3, 115.4, 86.5, 83.1, 81.9, 80.6, 76.3, 76.1, 72.4, 72.3, 64.1, 54.4, 32.7, 31.8, 30.3, 29.5, 22.2, 21.9, 19.4, 15.9; HRMS (ESI) calcd for  $\text{C}_{26}\text{H}_{38}\text{O}_5\text{Na}$   $[(\text{M} + \text{Na})^+]$  453.2611, found 453.2609.

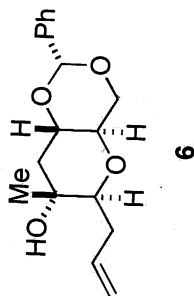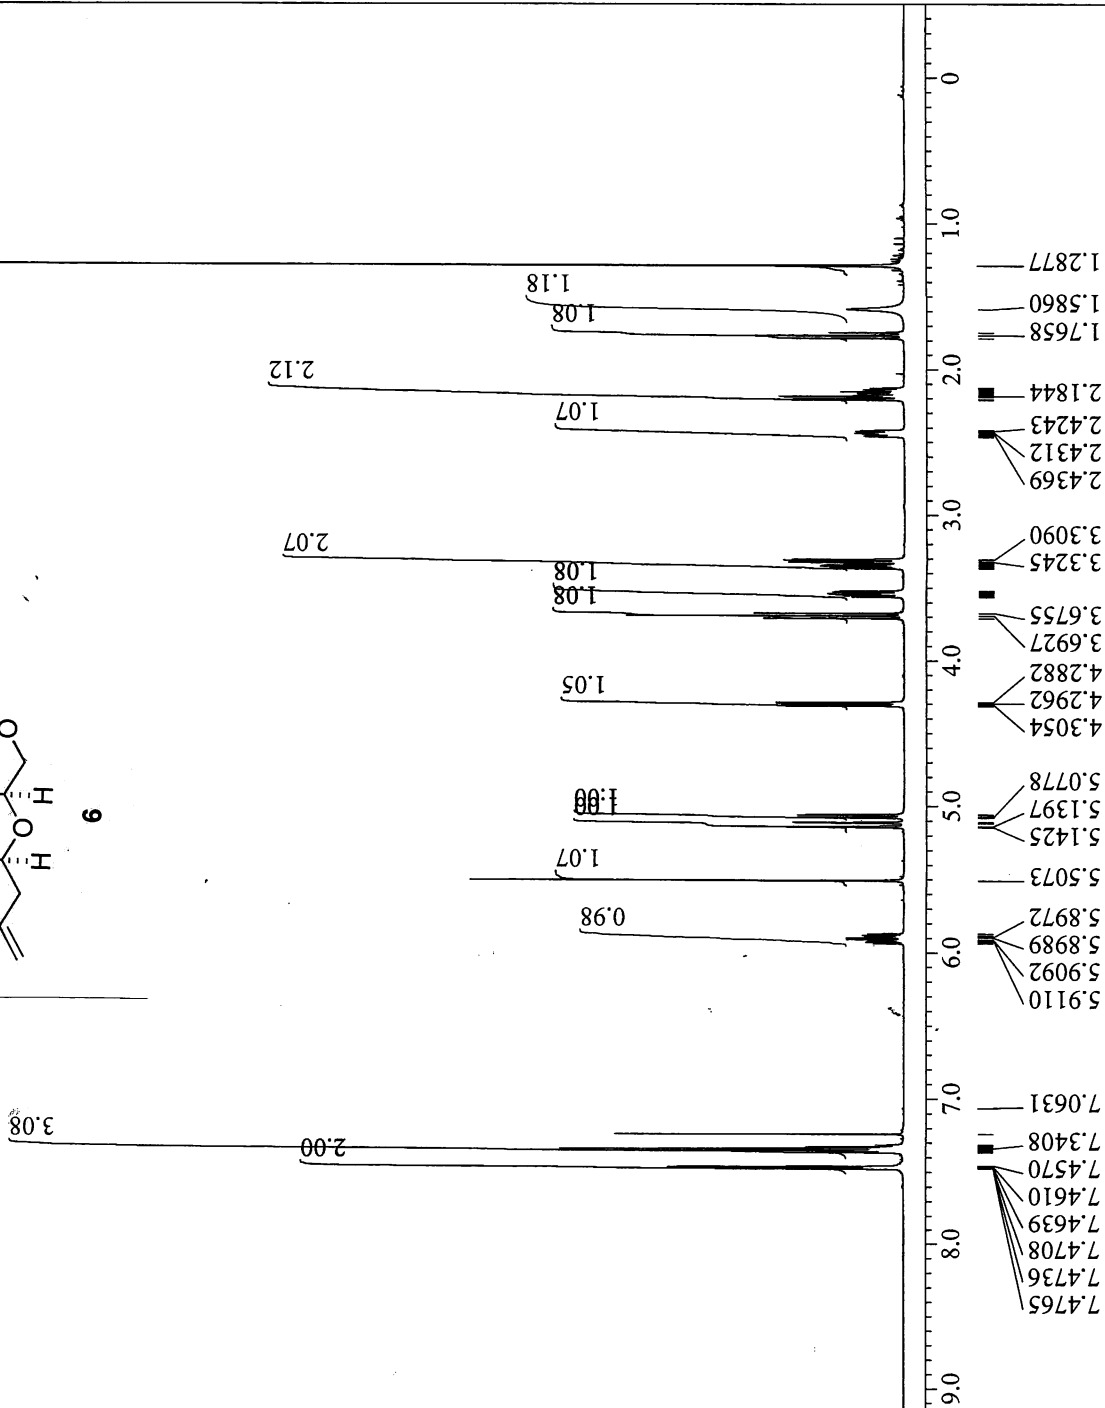

```

Filename = C:\Users\delta\Documents\J
Author = delta
Experiment = proton.jpg
Sample_Id = YS-III-113
Solvent = CHLOROFORM-D
Creation_Time = 5-OCT-2010 17:39:51
Revision_Time = 5-OCT-2010 17:45:07
Current_Time = 5-OCT-2010 17:45:26

Comment = single pulse
Data_Format = 1D COMPLEX
Dim_Size = 26214
Dim_Title = Proton
Dim_Units = [ppm]
Dimensions = X
Site = ECA600
Spectrometer = DELTA2_NMR

Field_Strength = 14.09636928[T] (600[MHz])
X_Acq_Duration = 2.9097984[s]
X_Domain = 1H
X_Freq = 600.1723046[MHz]
X_Offset = 5[ppm]
X_Points = 32768
X_Prescans = 1
X_Resolution = 0.34366642[Hz]
X_Sweep = 11.26126126[kHz]
X_Sweep_Clippped = 9.00900901[kHz]
Irr_Domain = Proton
Irr_Freq = 600.1723046[MHz]
Irr_Offset = 5[ppm]
Tri_Domain = Proton
Tri_Freq = 600.1723046[MHz]
Tri_Offset = 5[ppm]
Clipped = FALSE
Mod_Return = 1
Probe_Recovery = 5[us]
Scans = 8
Total_Scans = 8

X_90_Width = 12.4[us]
X_Acq_Time = 2.9097984[s]
X_Angle = 45[deg]
X_Atn = 3[dB]
X_Pulse = 6.2[us]
Irr_Mode = Off
Dante_Preset = FALSE
Initial_Wait = 1[s]
Recvr_Gain = 36
Relaxation_Delay = 1[s]
Repetition_Time = 3.9097984[s]
Temp_Get = 22.3[dc]

```

X : parts per Million : Proton : parts per Million

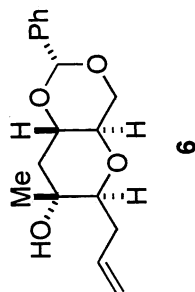

```

Filename = C:\Users\delta\Documents\J
Author = delta
Experiment = carbon.jpg
Sample_Id = YS-III-113
Solvent = CHLOROFORM-D
Creation_Time = 5-OCT-2010 17:42:14
Revision_Time = 5-OCT-2010 17:51:52
Current_Time = 5-OCT-2010 17:52:23

Comment = single pulse decoupled gat
Data_Format = ID COMPLEX
Dim_Size = 26214
Dim_Title = Carbon13
Dim_Units = [ppm]
Dimensions = X
Site = ECA600
Spectrometer = DELTA2_NMR

Field_Strength = 14.09636928[T] (600[MHz])
X_Acq_Duration = 0.69206016[s]
X_Domain = 13C
X_Freq = 150.91343039[MHz]
X_Offset = 100[ppm]
X_Points = 32768
X_Frescans = 4
X_Resolution = 1.44496109[Hz]
X_Sweep = 47.34848485[kHz]
X_Sweep_Clipped = 37.87878788[kHz]
Irr_Domain = Proton
Irr_Freq = 600.1723046[MHz]
Irr_Offset = 5[ppm]
Clipped = FALSE
Mod_Return = 1
Probe_Recovery = 20[us]
Scans = 194
Total_Scans = 194

X_90_Width = 8.4[us]
X_Acq_Time = 0.69206016[s]
X_Angle = 30[deg]
X_Atn = 6.4[db]
X_Pulse = 2.8[us]
Irr_Atn_Dec = 18[db]
Irr_Atn_Noise = 18[db]
Irr_Noise = WALTZ
Irr_Pwidth = 76[us]
Decoupling = TRUE
Initial_Wait = 1[s]
Noe = TRUE
Noe_Time = 2[s]
Recvr_Gain = 56
Relaxation_Delay = 2[s]
Repetition_Time = 2.69206016[s]
Temp_Get = 23.1[dc]

```

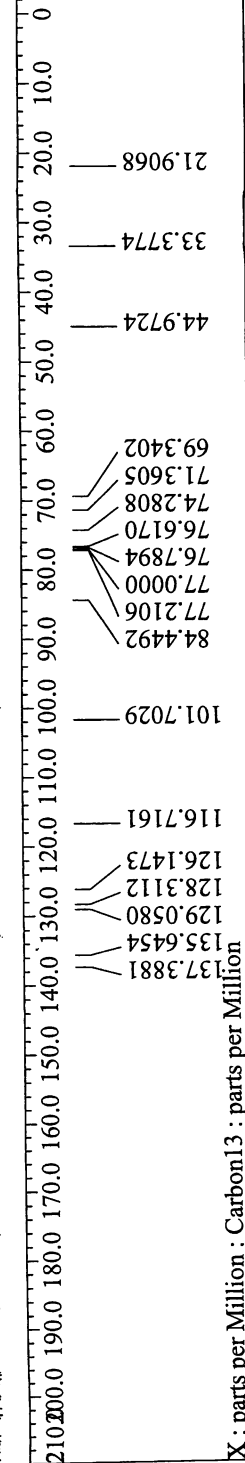

X : parts per Million : Carbon13 : parts per Million

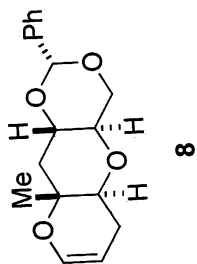

2.91

1.87

2.12

1.00

0.91

1.06

0.98

1.02

0.93

3.03

7.6952  
7.6838  
7.3597  
7.3471  
7.1037  
7.0911  
7.0780  
6.1538  
6.1526  
6.1457  
6.1434  
5.5411  
4.6535  
4.6472  
4.6438  
4.3139  
4.3059  
3.7299  
3.7127  
3.5444  
3.5363  
3.5266  
2.3167  
2.3092  
2.2978  
2.2903  
1.8866  
1.8672  
1.5545  
1.2768

Filename = C:\Users\delta\Documents\J  
 Author = delta  
 Experiment = proton.jpg  
 Sample\_Id = YS-III-138-1  
 Solvent = CHLOROFORM-D  
 Creation\_Time = 4-JUN-2010 17:20:02  
 Revision\_Time = 4-JUN-2010 17:23:06  
 Current\_Time = 4-JUN-2010 17:23:34  
 Comment = single\_pulse  
 Data\_Format = 1D COMPLEX  
 Dim\_Size = 26214  
 Dim\_Title = Proton  
 Dim\_Units = [ppm]  
 Dimensions = X  
 Site = ECA600  
 Spectrometer = DELTA2\_NMR  
 Field\_Strength = 14.09636928[T] (600[MHz])  
 X\_Acq\_Duration = 2.9097984[s]  
 X\_Domain = 1H  
 X\_Freq = 600.1723046[MHz]  
 X\_Offset = 5[ppm]  
 X\_Points = 32768  
 X\_Prescans = 1  
 X\_Resolution = 0.34366642[Hz]  
 X\_Sweep = 11.26126126[MHz]  
 X\_Sweep\_Clippped = 9.00900901[kHz]  
 Irr\_Domain = Proton  
 Irr\_Freq = 600.1723046[MHz]  
 Irr\_Offset = 5[ppm]  
 Tri\_Domain = Proton  
 Tri\_Freq = 600.1723046[MHz]  
 Tri\_Offset = 5[ppm]  
 Clipped = FALSE  
 Mod\_Return = 1  
 Probe\_Recovery = 5[us]  
 Scans = 8  
 Total\_Scans = 8  
 X\_90\_Width = 12.4[us]  
 X\_Acq\_Time = 2.9097984[s]  
 X\_Angle = 45[deg]  
 X\_Atn = 3[db]  
 X\_Pulse = 6.2[us]  
 Irr\_Mode = Off  
 Tri\_Mode = Off  
 Dante\_Preset = FALSE  
 Initial\_Wait = 1[s]  
 Recvr\_Gain = 38  
 Relaxation\_Delay = 1[s]  
 Repetition\_Time = 3.9097984[s]  
 Temp\_Get = 22[dc]

X : parts per Million : Proton : parts per Million

YS-III-138

File: xp

Pulse Sequence: s2pul

Solvent: c6d6

Temp. 20.0 C / 293.1 K

Operator: vnmr1

VNMRS-600 "varian600"

Relax. delay 1.700 sec

Pulse 45.0 degrees

Acq. time 1.300 sec

Width 36764.7 Hz

256 repetitions

OBSERVE C13, 150.8369680 MHz

DECOUPLE H1, 599.8713508 MHz

Power 37 dB

continuously on

WALTZ-16 modulated

DATA PROCESSING

Line broadening 1.0 Hz

FT size 131072

Total time 12 min, 48 sec

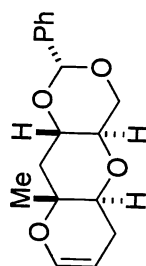

8

180 160 140 120 100 80 60 40 20 ppm



YS-IV-98

File: xp

Pulse Sequence: s2pul

Solvent: c6d6

Temp. 20.0 C / 293.1 K

Operator: vnmr1

VNMR-600 "varian600"

Relax. delay 1.592 sec

Pulse 45.0 degrees

Acq. time 3.408 sec

Width 9615.4 Hz

64 repetitions

OBSERVE H1, 599.8683258 MHz

DATA PROCESSING

Line broadening 0.3 Hz

FT size 65536

Total time 5 min, 20 sec

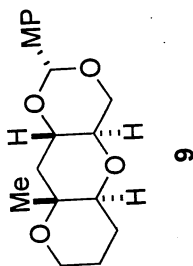

9

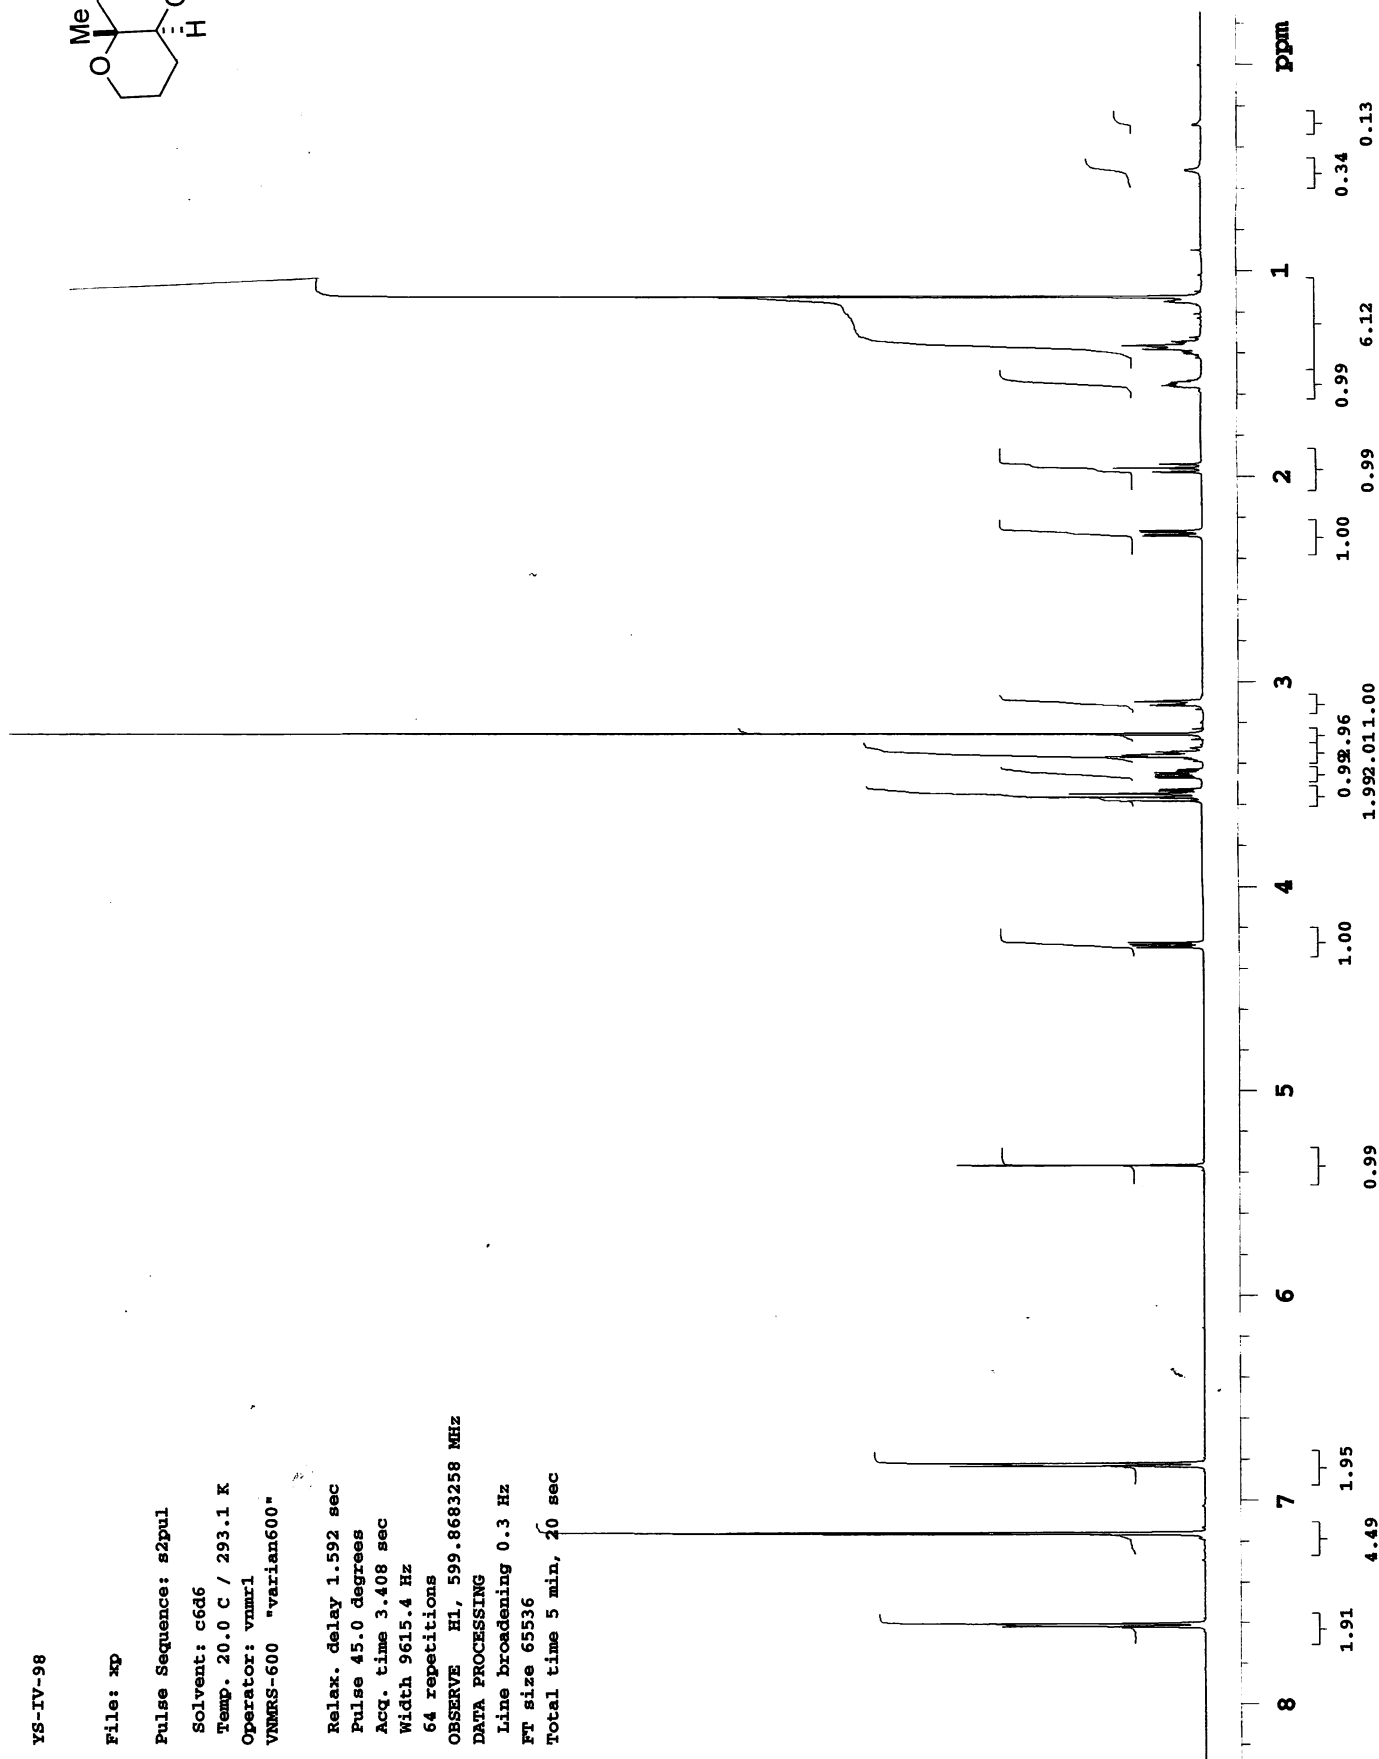

YS-IV-98

File: xp

Pulse Sequence: s2pul

Solvent: c6d6

Temp. 20.0 C / 293.1 K

Operator: vnmr1

VNMR5-600 "varian600"

Relax. delay 1.700 sec

Pulse 45.0 degrees

Acq. time 1.300 sec

Width 36764.7 Hz

200 repetitions

OBSERVE C13, 150.8369674 MHz

DECOUPLE H1, 599.8713508 MHz

Power 37 dB

continuously on

WALTZ-16 modulated

DATA PROCESSING

Line broadening 1.0 Hz

FT size 131072

Total time 10 min, 0 sec

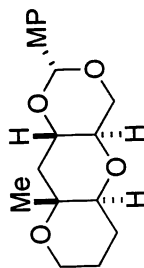

9

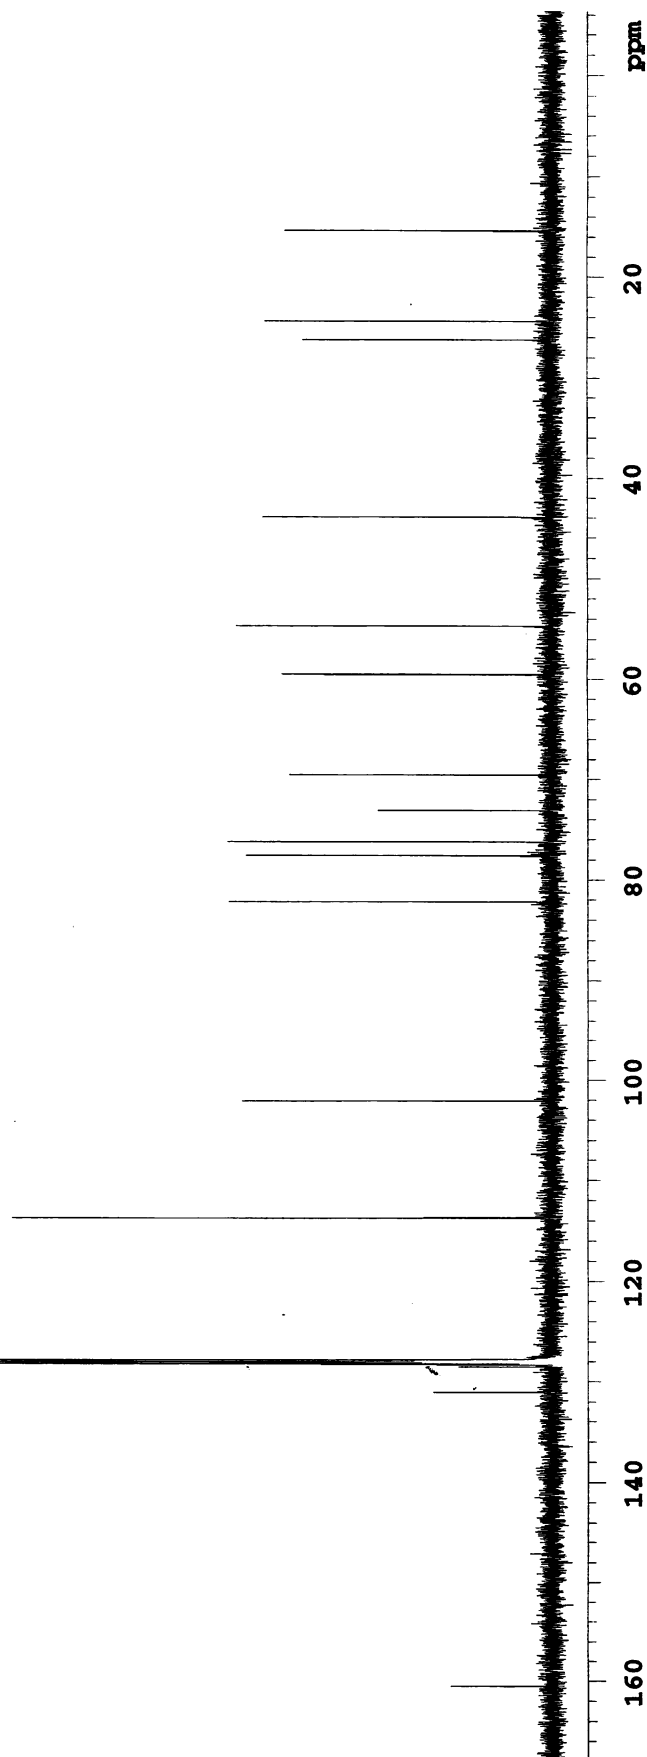

## STANDARD PROTON PARAMETERS

exp1 s2pu1

|             |            |            |          |
|-------------|------------|------------|----------|
| SAMPLE      |            | DEC. & VT  |          |
| date        | Dec 8 2007 | dfrq       | 499.862  |
| solvent     | CDCl3      | dn         | H1       |
| file        | exp        | dpwr       | 30       |
| ACQUISITION |            | dof        | 0        |
| sfrq        | 499.862    | dm         | nnn      |
| tn          | H1         | dmf        | C        |
| at          | 1.892      | dseq       | 200      |
| np          | 30272      | dres       | 1.0      |
| sw          | 8000.0     | homo       | n        |
| fb          | not used   | processing |          |
| bs          | 4          | wtfile     |          |
| tpwr        | 54         | proc       | lp       |
| pw          | 2.5        | fn         | not used |
| d1          | 1.000      | math       | f        |
| tof         | -140.0     | werr       |          |
| nt          | 64         | wexp       |          |
| ct          | 16         | wbs        |          |
| alock       | n          | wnt        |          |
| gain        | not used   |            |          |
| FLAGS       |            |            |          |
| il          | n          |            |          |
| in          | n          |            |          |
| dp          | y          |            |          |
| hs          | nn         |            |          |
| DISPLAY     |            |            |          |
| sp          | -250.4     |            |          |
| wp          | 5248.4     |            |          |
| vs          | 112        |            |          |
| sc          | 0          |            |          |
| wc          | 250        |            |          |
| hzmm        | 20.99      |            |          |
| ls          | 18436.57   |            |          |
| rfl         | 5277.2     |            |          |
| rffp        | 3619.0     |            |          |
| th          | 7          |            |          |
| ins         | 1.000      |            |          |
| nm          | ph         |            |          |

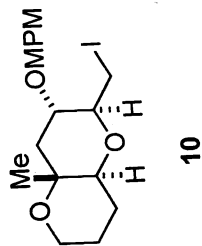

10

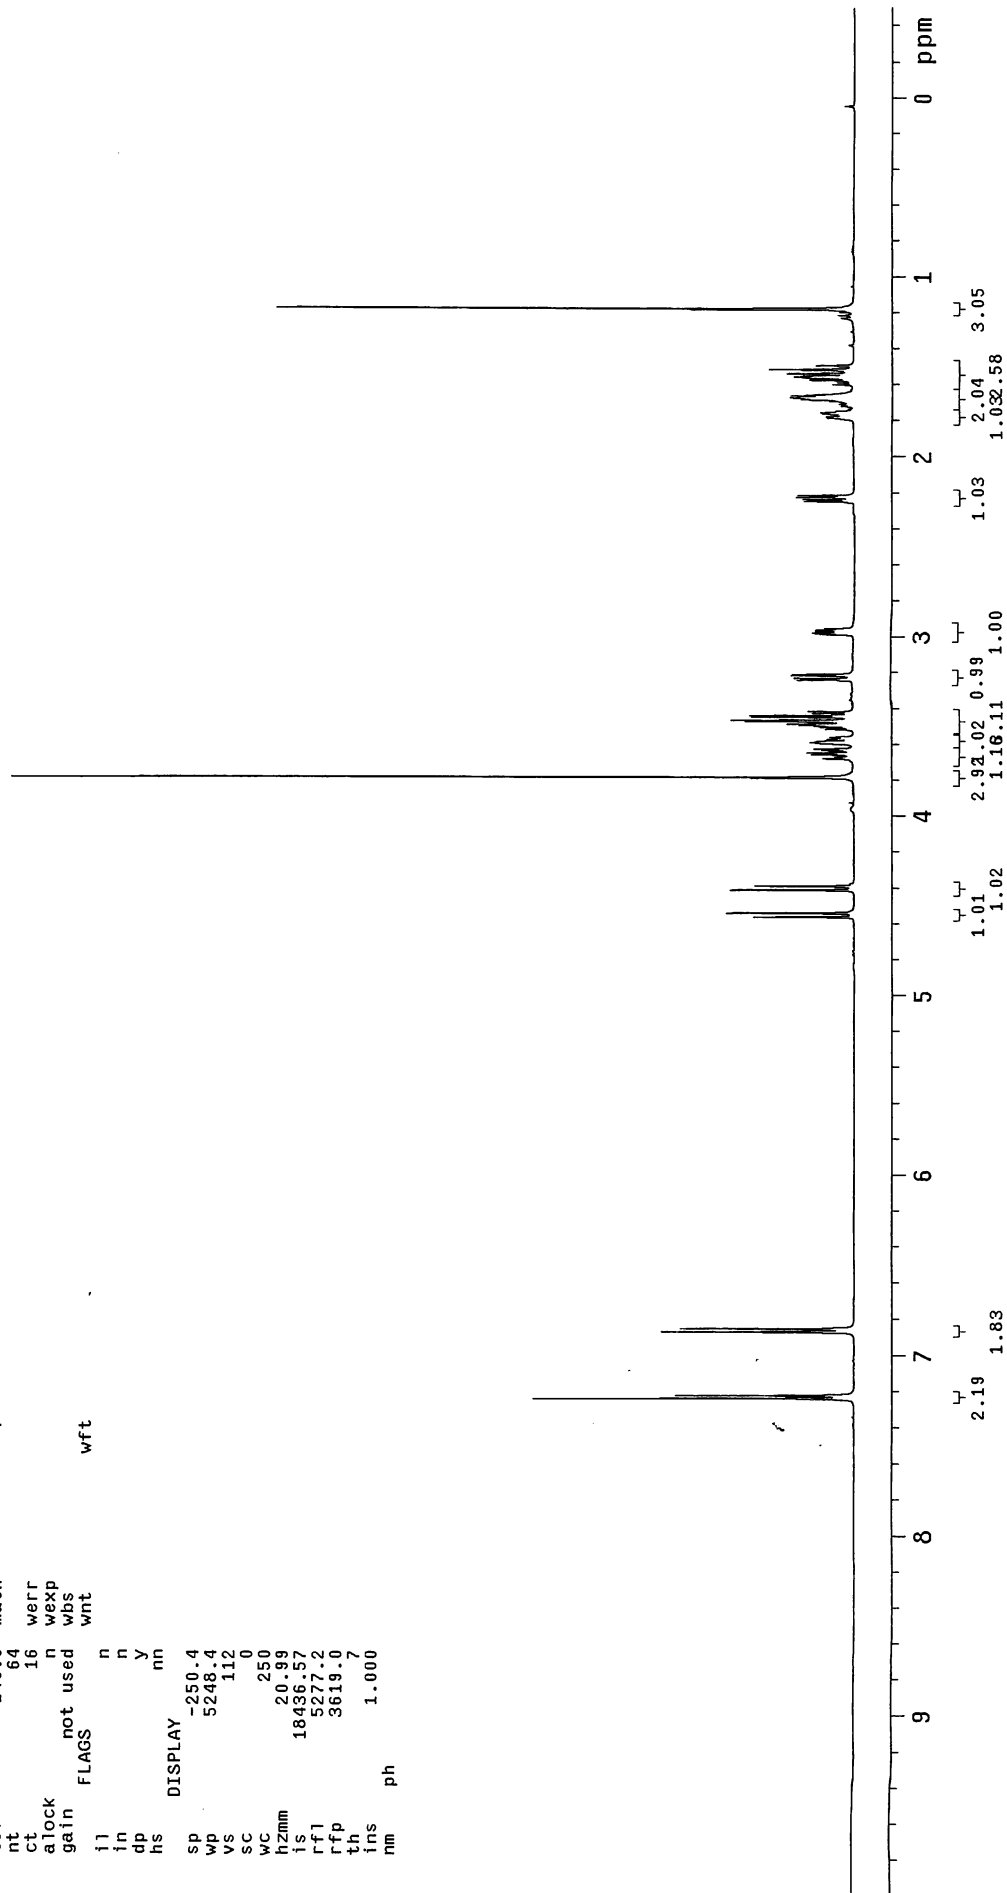

# STANDARD CARBON PARAMETERS

```

exp2 s2pu1
SAMPLE
date Dec 8 2007 DEC. & VT
solvent CDC13 dn 499.862
file exp 27 H1
ACQUISITION
sfrq 125.704 dm yvy 0
tn 1.288 dmf 12579 W
at 37894 dseq 1.0
np 37735.8 dres 1.0
sw not used homo n
bs 8 PROCESSING
tpwr 61 lb 0.50
pw 5.3 wfile
d1 0.700 proc ft
tof 1883.8 fn 131072 f
nt 5120 math
ct 128
alock n werr wft
gain 56 wexp wft
flags n wbs wft
il n wnt
in n
dp y
hs nn
DISPLAY
sp -1257.1
wp 28908.1
vs 79
sc 0
wc 250
hzmm 115.63
ls 500.00
rfl 14754.0
rfp 9678.1
th 70
ins 100.000
nm ph
  
```

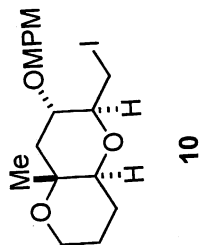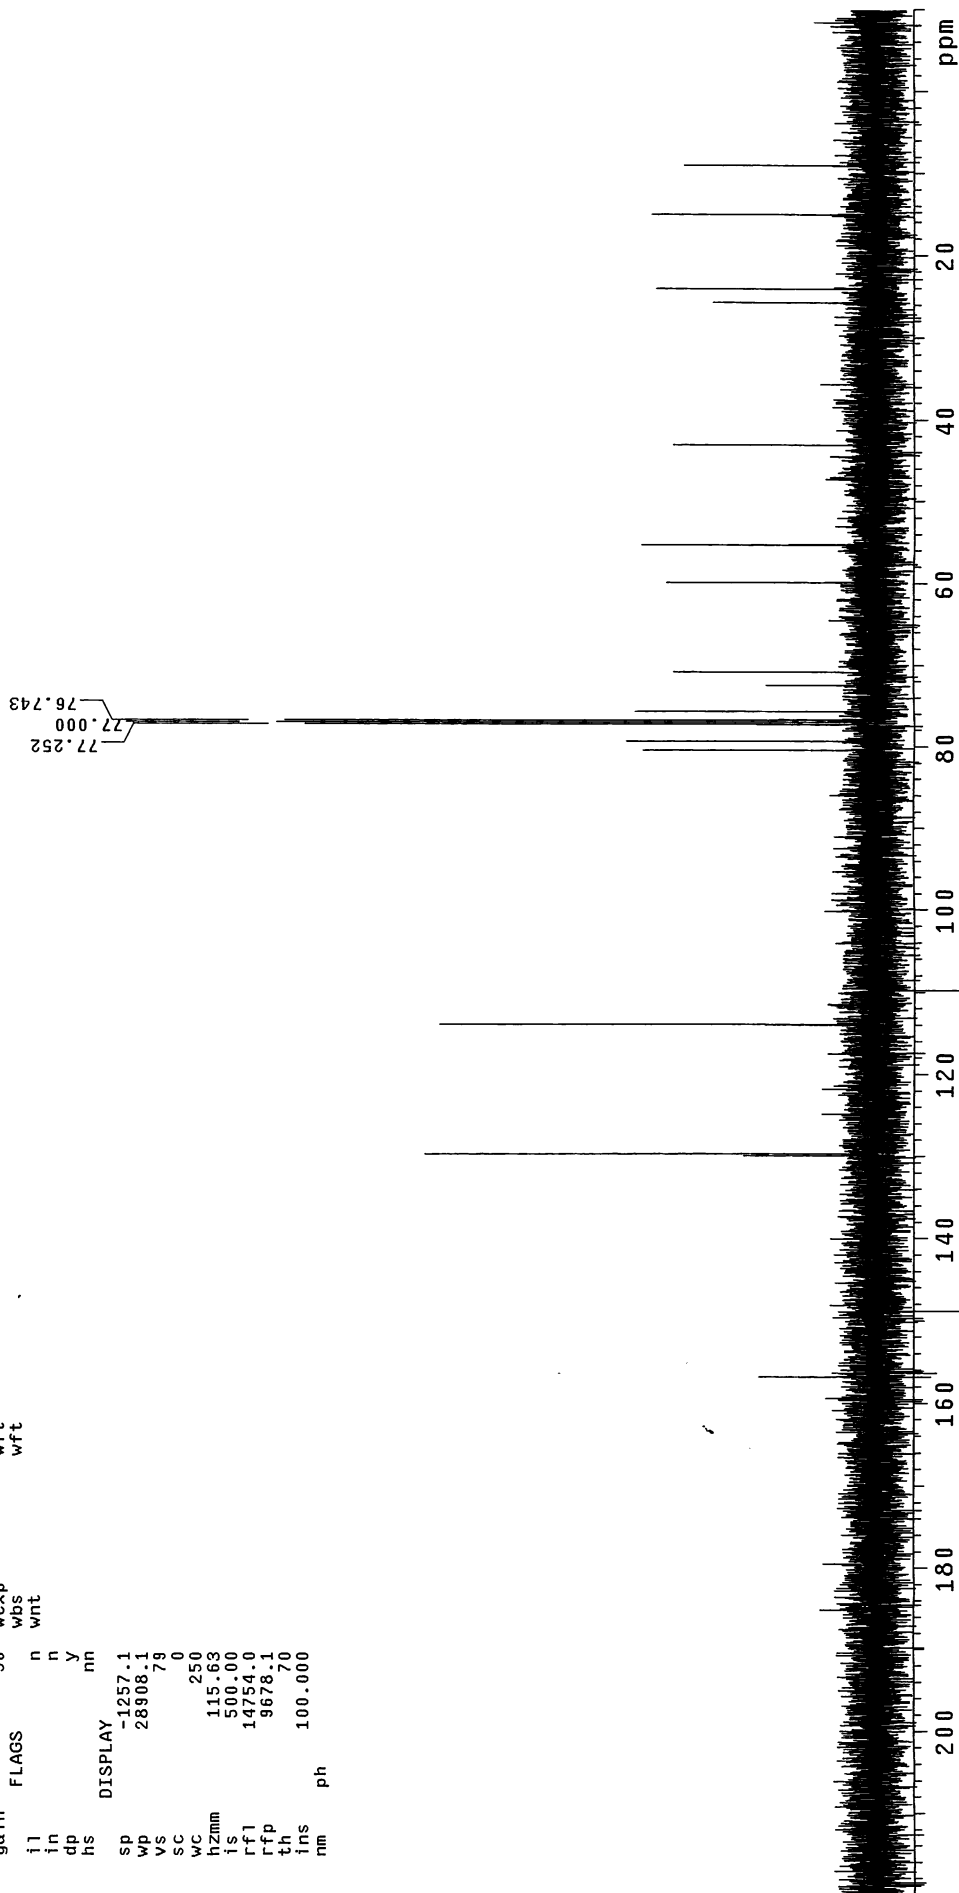

X : parts per Million : Proton : parts per Million

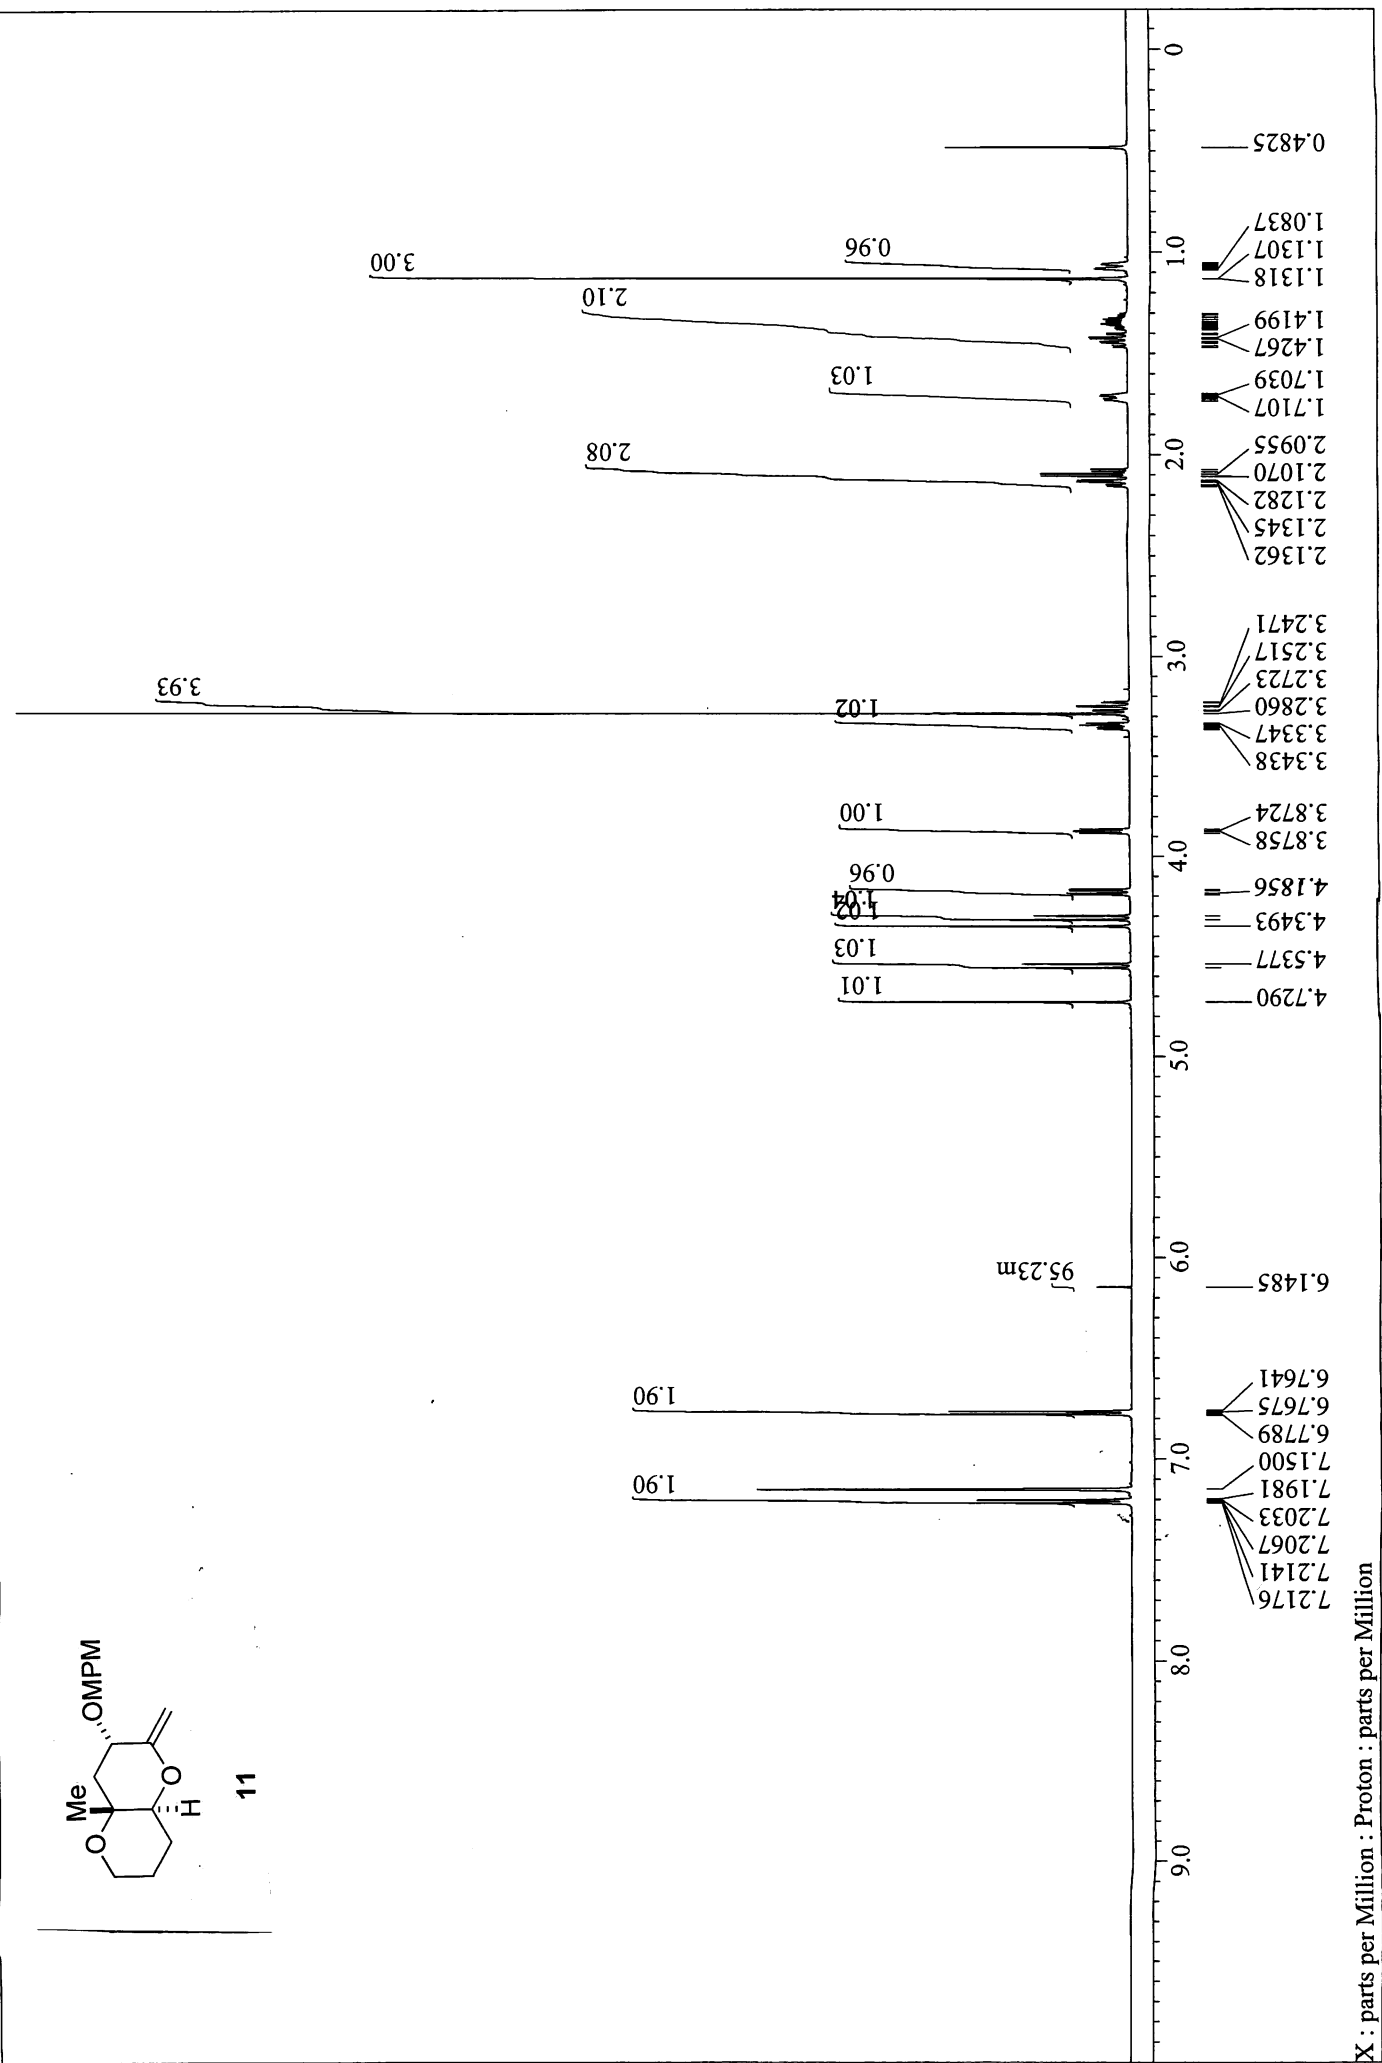

# STANDARD CARBON PARAMETERS

Pulse Sequence: s2pul  
 Solvent: CDCl3  
 Ambient temperature  
 User: 1-14-87  
 INOVA-500 "varian"  
 Relax. delay 0.700 sec  
 Pulse 45.0 degrees  
 Acq. time 1.298 sec  
 Width 37735.8 Hz  
 192 repetitions  
 OBSERVE C13, 125.6897254 MHZ  
 DECOUPLE H1, 499.8618041 MHZ  
 Power 27 dB  
 continuously on  
 WALTZ-16 modulated  
 DATA PROCESSING  
 Line broadening 0.5 Hz  
 FT size 131072  
 Total time 5 hr, 34 min, 36 sec

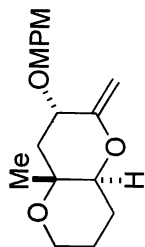

11

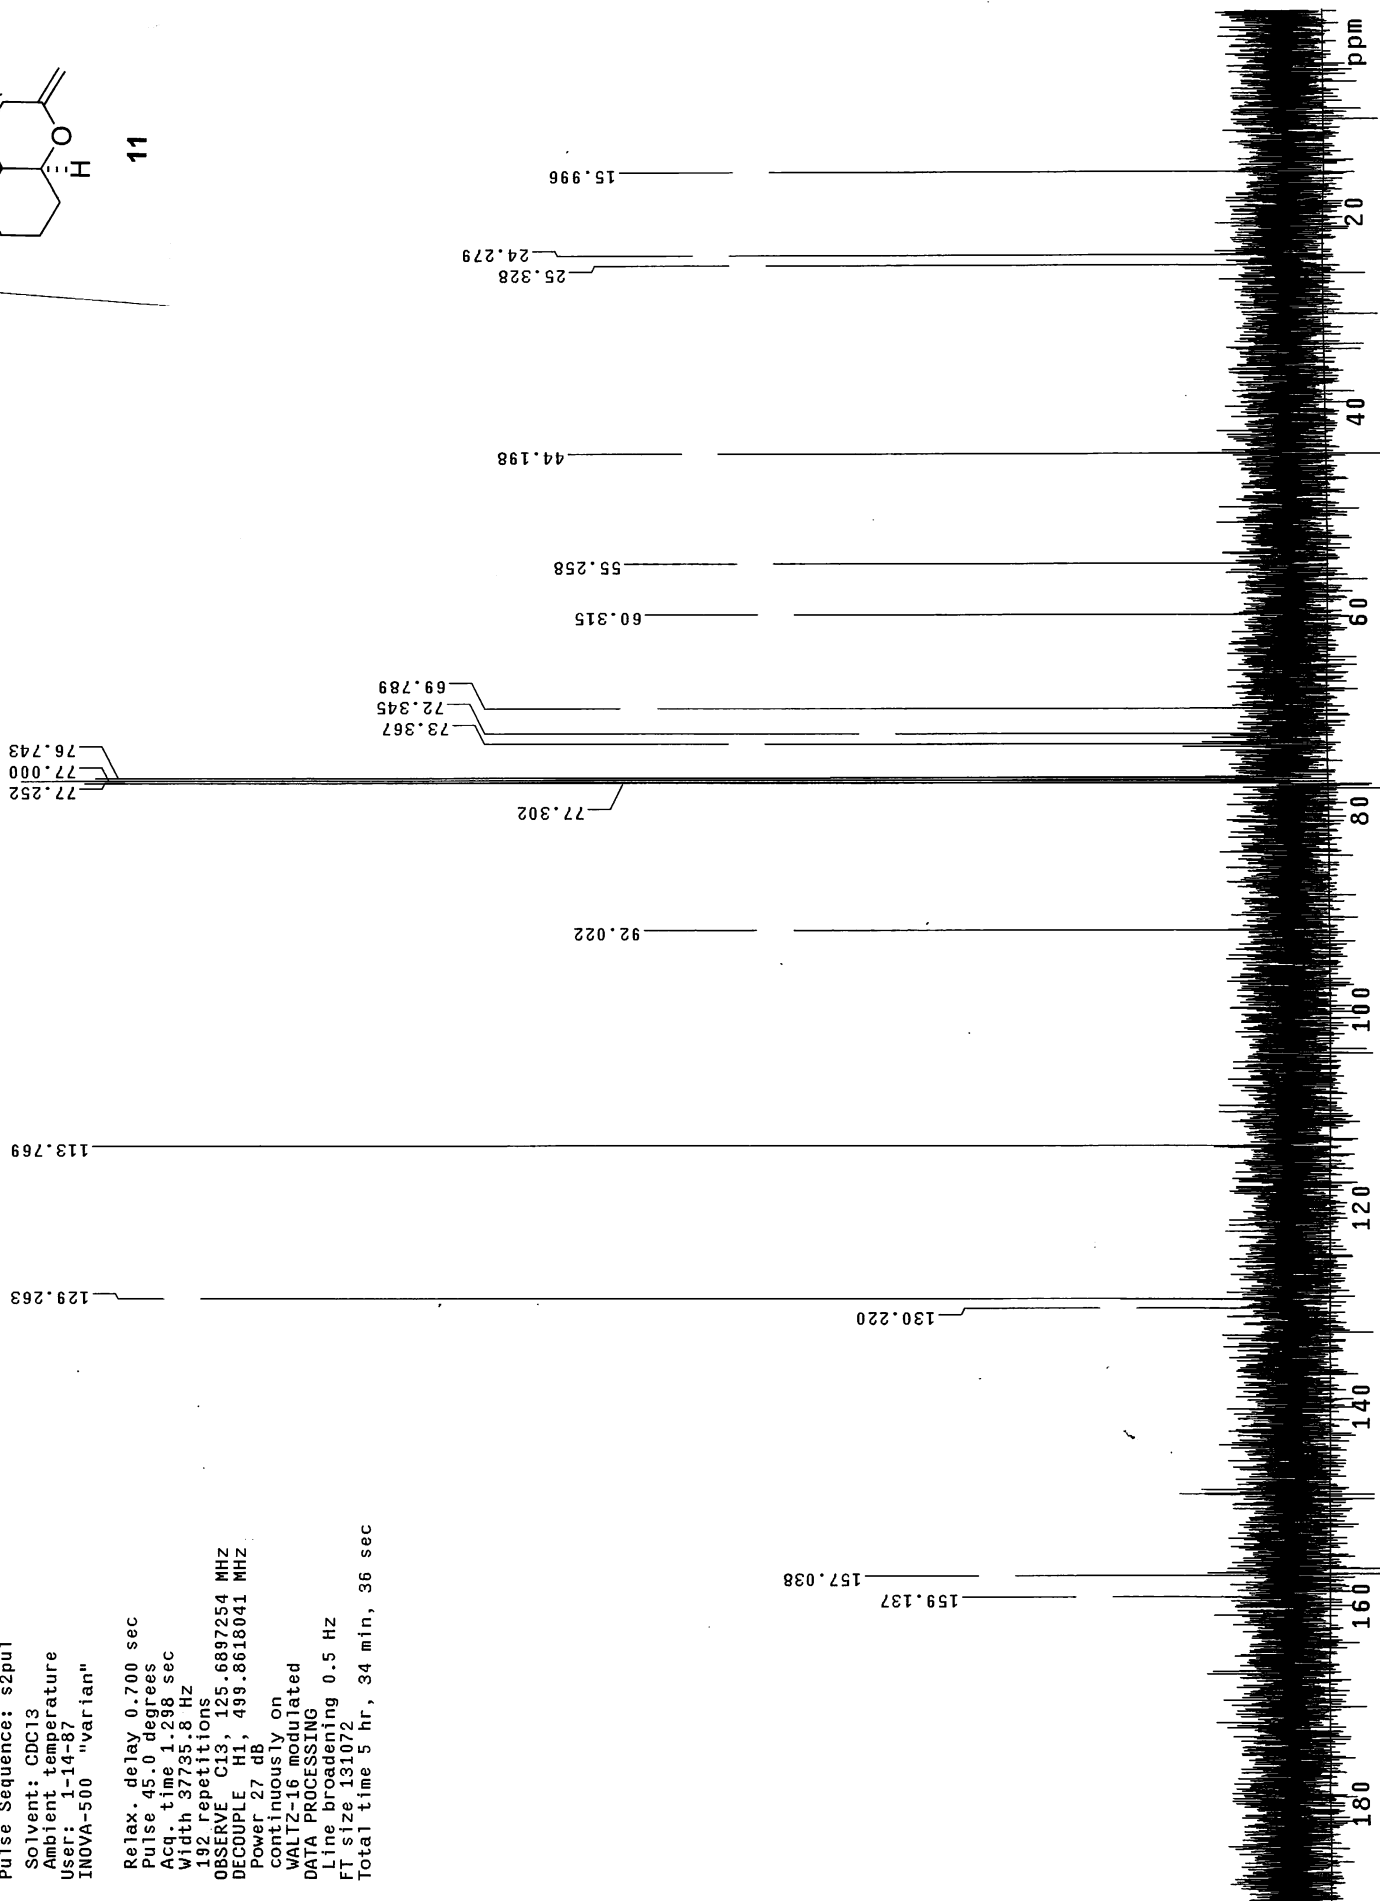

# STANDARD PROTON PARAMETERS

```

exp1 s2pu1
SAMPLE
date Dec 10 2007 dfrq DEC. & VT 499.862
solvent Benzene dn H1
file exp 30
ACQUISITION
sfrq 499.862 dm nnn
tn 1.892 dm c
at 30272 dmf 200
np 8000.0 dseq 1.0
sw not used dres n
fb not used homo n
bs 4
PROCESSING
tpwr 54 wfile
pw 2.5 proc lp
d1 1.000 fn not used f
tof -140.0 math
nt 64 werr
ct 20 wexp
alock n wbs
gain not used wnt
FLAGS
il n
in n
dp y
hs nn
DISPLAY
sp -250.0
wp 5248.4
vs 181
sc 0
wc 250
hzmm 20.99
is 19185.08
rfl 5205.9
rfp 3574.0
th 69
ins 1.000
nm ph
  
```

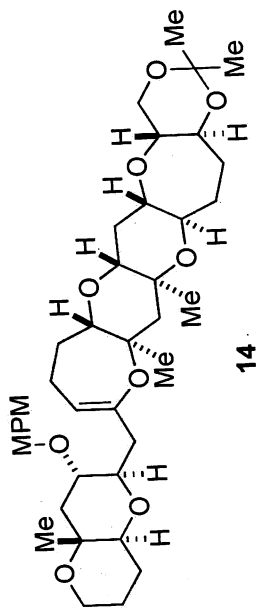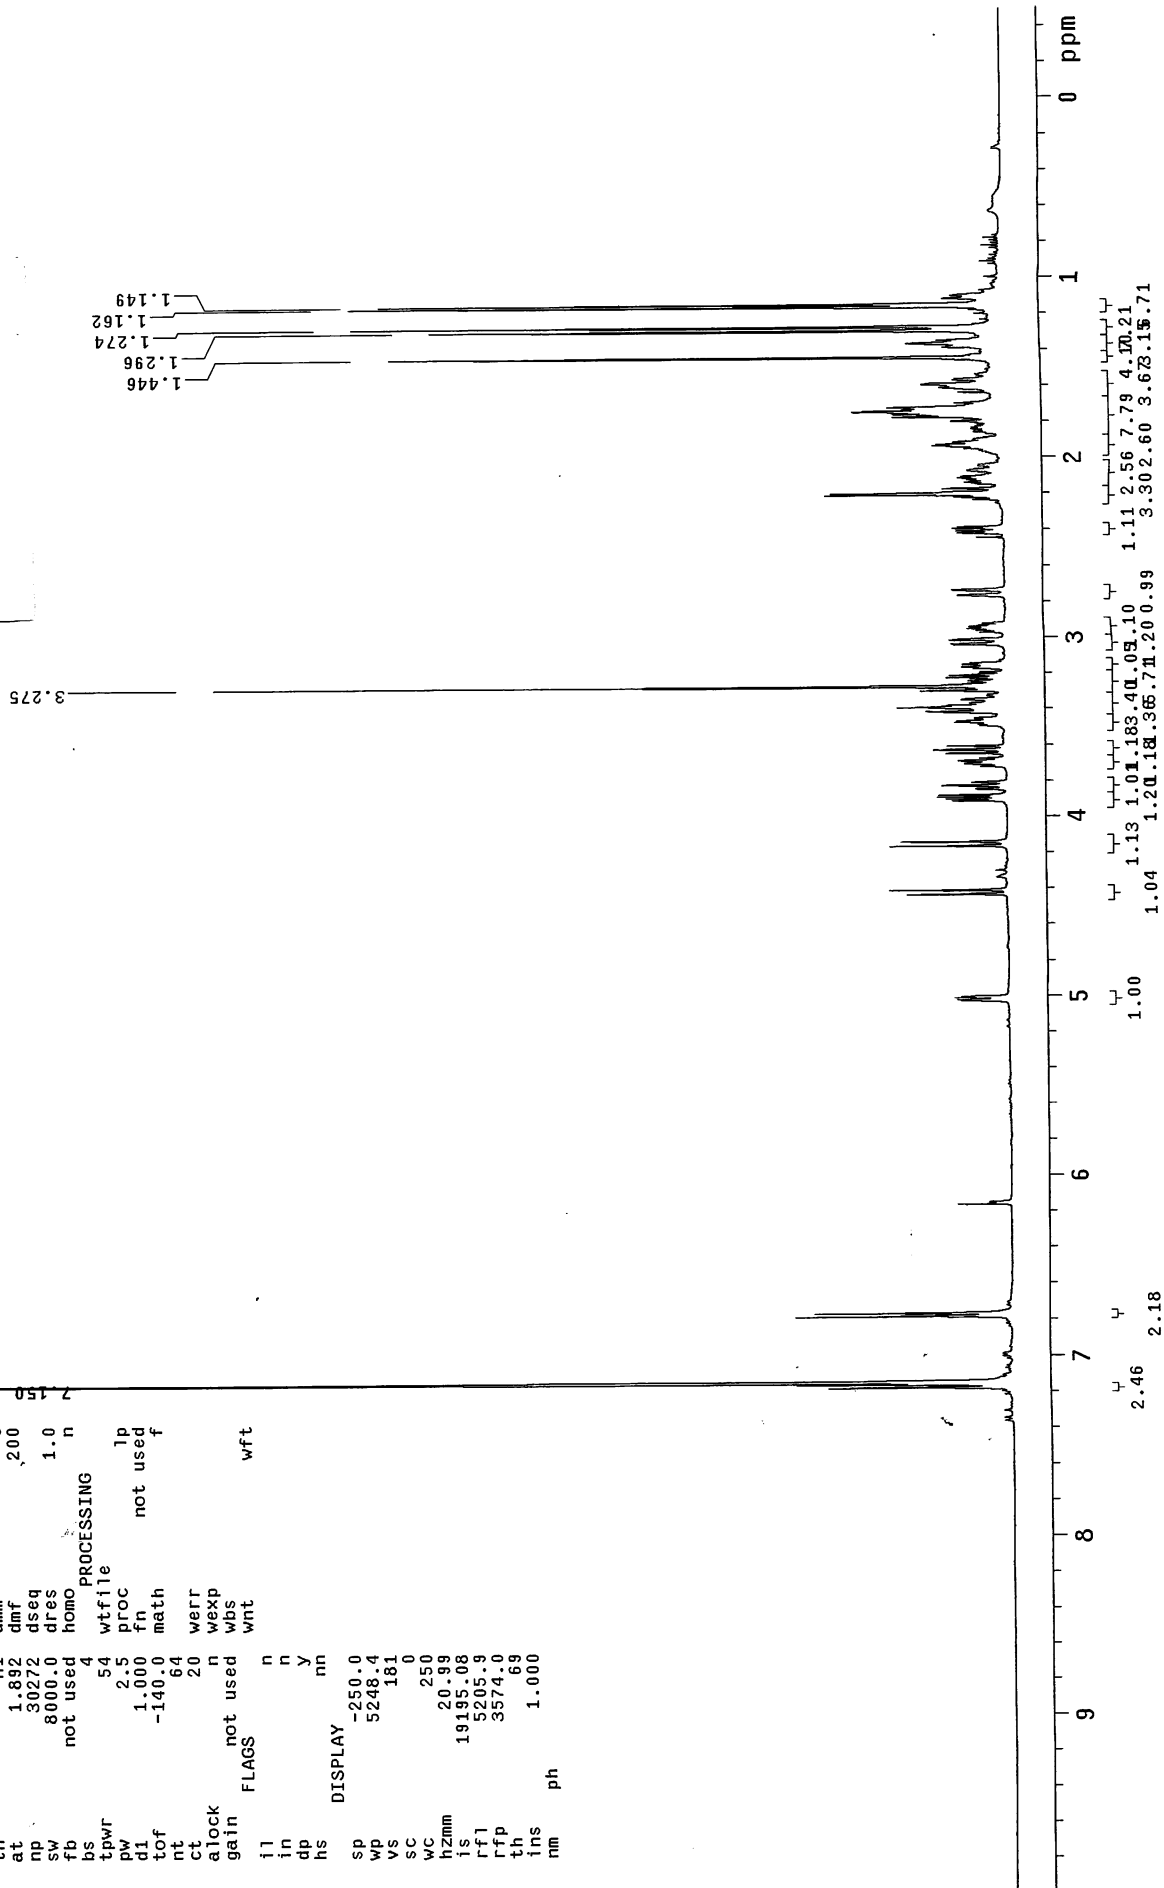

## STANDARD CARBON PARAMETERS

exp3 s2pul

date Dec 10 2007  
 solvent Benzene  
 file ACQUISITION  
 sfrq 125.704  
 tn C13  
 at 1.298  
 np 97994  
 sw 37735.8  
 fb not used  
 bs homo  
 tpwr 61  
 pw 5.3  
 d1 0.700  
 tof 1883.8  
 nt 5120  
 ct 256  
 alock n  
 gain 56  
 il n  
 in n  
 dp n  
 hs Y  
 nn  
 sp -1256.9  
 wp 28908.1  
 vs 655  
 sc 0  
 wc 250  
 hzmm 115.63  
 is 500.00  
 rfl 21120.2  
 rfp 16086.3  
 th 102  
 ins 100.000  
 nm ph

DEC. & VT  
 dfrq 499.862  
 dn H1  
 dpwr 27  
 dof 0  
 dmm VVY  
 dm 12579  
 dmf W  
 dseq 1.0  
 dres n  
 homo n  
 PROCESSING  
 lb 0.50  
 wf file  
 proc ft  
 fn 131072  
 math f  
 werr  
 wexp wft  
 wbs wft  
 wnt wft

DISPLAY  
 -1256.9  
 28908.1  
 655  
 0  
 250  
 115.63  
 500.00  
 21120.2  
 16086.3  
 102  
 100.000

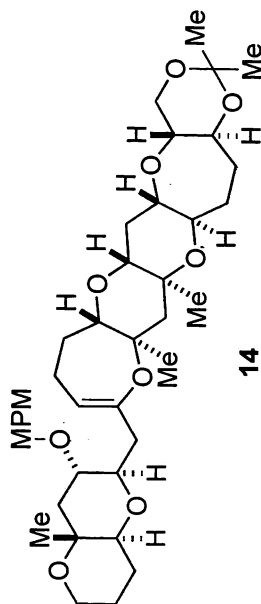

127.808  
128.000  
128.192

ppm

20

40

60

80

100

120

140

160

180

200



## STANDARD PROTON PARAMETERS

exp1 s2pul

|             |            |           |          |
|-------------|------------|-----------|----------|
| SAMPLE      |            | DEC. & VT |          |
| date        | Feb 5 2007 | dfrq      | 499.862  |
| solvent     | Benzene    | dn        | H1       |
| file        | 0          | exp       | 30       |
| ACQUISITION |            | dof       | 0        |
| sfrq        | 499.862    | dm        | nnn      |
| tn          | H1         | dmn       | c        |
| at          | 1.892      | dmf       | 200      |
| np          | 30272      | dseq      |          |
| sw          | 8000.0     | dres      | 1.0      |
| fb          | not used   | homo      | n        |
| bs          | 4          | temp      | 20.0     |
| PROCESSING  |            |           |          |
| tpwr        | 54         | wtfile    |          |
| pw          | 2.6        | proc      | lp       |
| d1          | 1.000      | fn        | not used |
| tof         | -140.0     | math      | f        |
| nt          | 64         |           |          |
| ct          | 32         |           |          |
| alock       | n          | werr      |          |
| gain        | not used   | wexp      |          |
| FLAGS       |            | wbs       |          |
| il          | n          | wnt       | wft      |
| in          | n          |           |          |
| dp          | y          |           |          |
| hs          | nn         |           |          |
| DISPLAY     |            |           |          |
| sp          | -250.0     |           |          |
| wp          | 4248.8     |           |          |
| vs          | 299        |           |          |
| sc          | 0          |           |          |
| wc          | 250        |           |          |
| hzmm        | 17.00      |           |          |
| is          | 11067.04   |           |          |
| rfl         | 5206.4     |           |          |
| rfp         | 3574.0     |           |          |
| th          | 51         |           |          |
| ins         | 1.000      |           |          |
| nm          | ph         |           |          |

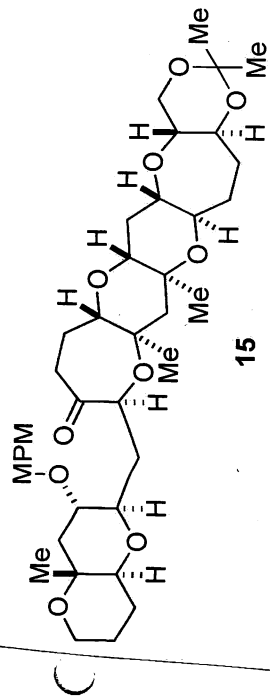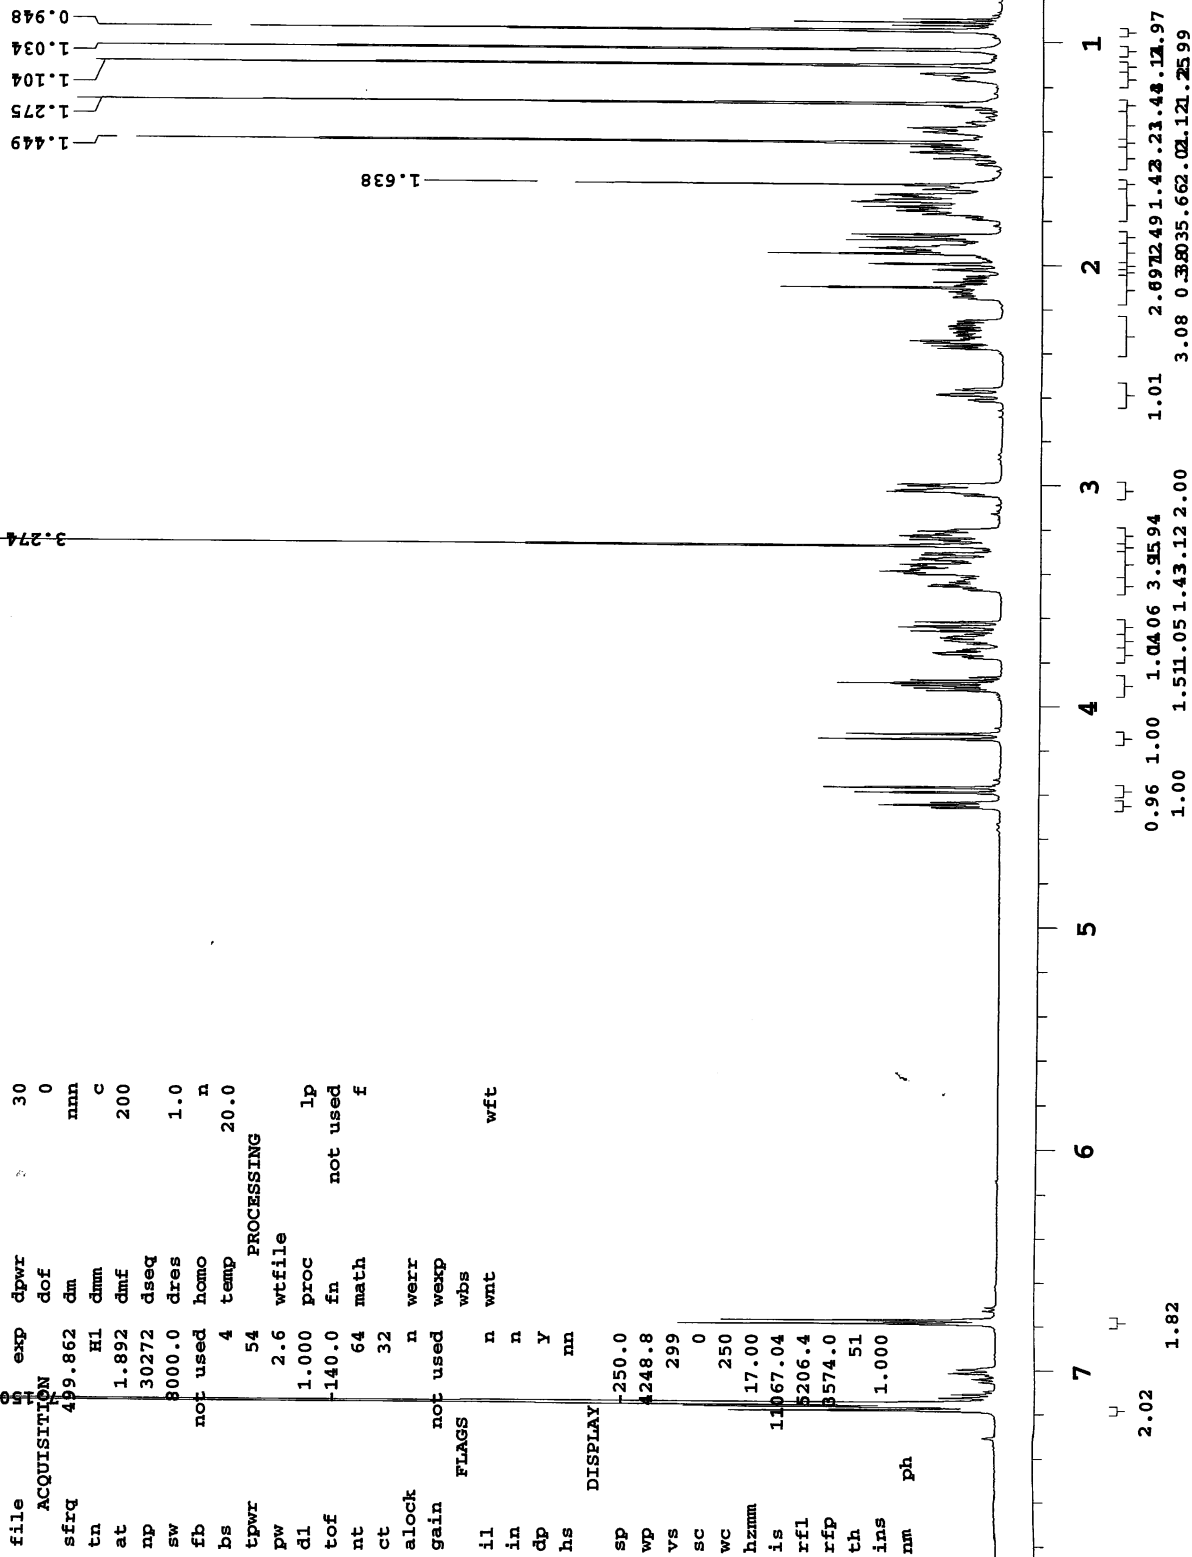

## STANDARD CARBON PARAMETERS

exp2 s2pul

|             |             |           |         |
|-------------|-------------|-----------|---------|
| SAMPLE      |             | DEC. & VT |         |
| date        | Dec 15 2007 | dfrq      | 499.862 |
| solvent     | Benzene     | dn        | H1      |
| file        | exp         | dpwr      | 27      |
| ACQUISITION |             | dof       | 0       |
| sfrq        | 125.704     | dm        | yyy     |
| tn          | C13         | dmn       | w       |
| at          | 1.298       | dmf       | 12579   |
| np          | 97994       | dseq      |         |
| sw          | 37735.8     | dres      | 1.0     |
| fb          | not used    | homo      | n       |
| bs          | 8           | temp      | 20.0    |
| PROCESSING  |             |           |         |
| tpwr        | 61          |           |         |
| pw          | 5.3         | lb        | 0.50    |
| d1          | 0.700       | wtfile    |         |
| tof         | 1883.8      | proc      | ft      |
| nt          | 5120        | fn        | 131072  |
| ct          | 536         | math      | f       |
| alock       | n           |           |         |
| gain        | 56          | werr      |         |
| il          |             | wexp      | wft     |
| in          | n           | wbs       | wft     |
| dp          | n           | wnt       |         |
| hs          | y           |           |         |
| DISPLAY     |             |           |         |
| sp          | -1256.9     |           |         |
| wp          | 28908.1     |           |         |
| vs          | 420         |           |         |
| sc          | 0           |           |         |
| wc          | 250         |           |         |
| hzmm        | 115.63      |           |         |
| is          | 500.00      |           |         |
| rfl         | 21120.2     |           |         |
| rfp         | 16088.3     |           |         |
| th          | 154         |           |         |
| ins         | 100.000     |           |         |
| nm          | ph          |           |         |

128.192  
128.190  
127.808

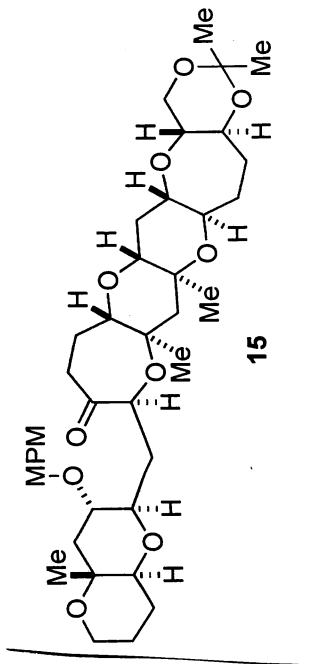

15

ppm

20

40

60

80

100

120

140

160

180

200

## STANDARD PROTON PARAMETERS

exp1 s2pul

|             |             |           |          |
|-------------|-------------|-----------|----------|
| SAMPLE      |             | DEC. & VT |          |
| date        | Dec 15 2007 | dfrq      | 499.862  |
| solvent     | Benzene     | dn        | H1       |
| file        | exp         | dpwr      | 300      |
| ACQUISITION |             | dof       | 0        |
| sfrq        | 499.862     | dm        | nnn      |
| tn          | H1          | dmm       | c        |
| at          | 1.892       | dmf       | 200      |
| np          | 30272       | dseq      |          |
| sw          | 8000.0      | dres      | 1.0      |
| fb          | not used    | homo      | n        |
| bs          | 4           | temp      | 20.0     |
| PROCESSING  |             |           |          |
| tpwr        | 54          |           |          |
| pw          | 2.5         | wtfile    |          |
| d1          | 1.000       | proc      | lp       |
| tof         | -140.0      | fn        | not used |
| nt          | 64          | math      | f        |
| ct          | 16          |           |          |
| alock       | n           | werr      |          |
| gain        | not used    | wexp      |          |
| FLAGS       |             | wbs       |          |
| il          | n           | wnt       | wft      |
| in          | n           |           |          |
| dp          | y           |           |          |
| hs          | nm          |           |          |
| DISPLAY     |             |           |          |
| sp          | -250.0      |           |          |
| wp          | 5248.4      |           |          |
| vs          | 167         |           |          |
| sc          | 0           |           |          |
| wc          | 250         |           |          |
| hzmm        | 20.99       |           |          |
| is          | 28390.58    |           |          |
| rfl         | 5205.9      |           |          |
| rfp         | 3574.0      |           |          |
| th          | 139         |           |          |
| ins         | 1.000       |           |          |
| nm          | ph          |           |          |

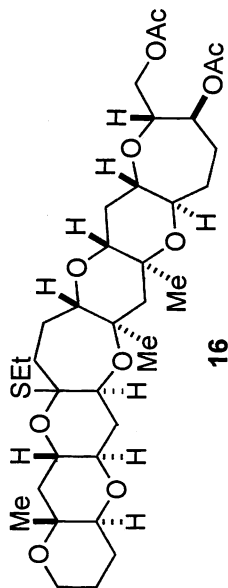

16

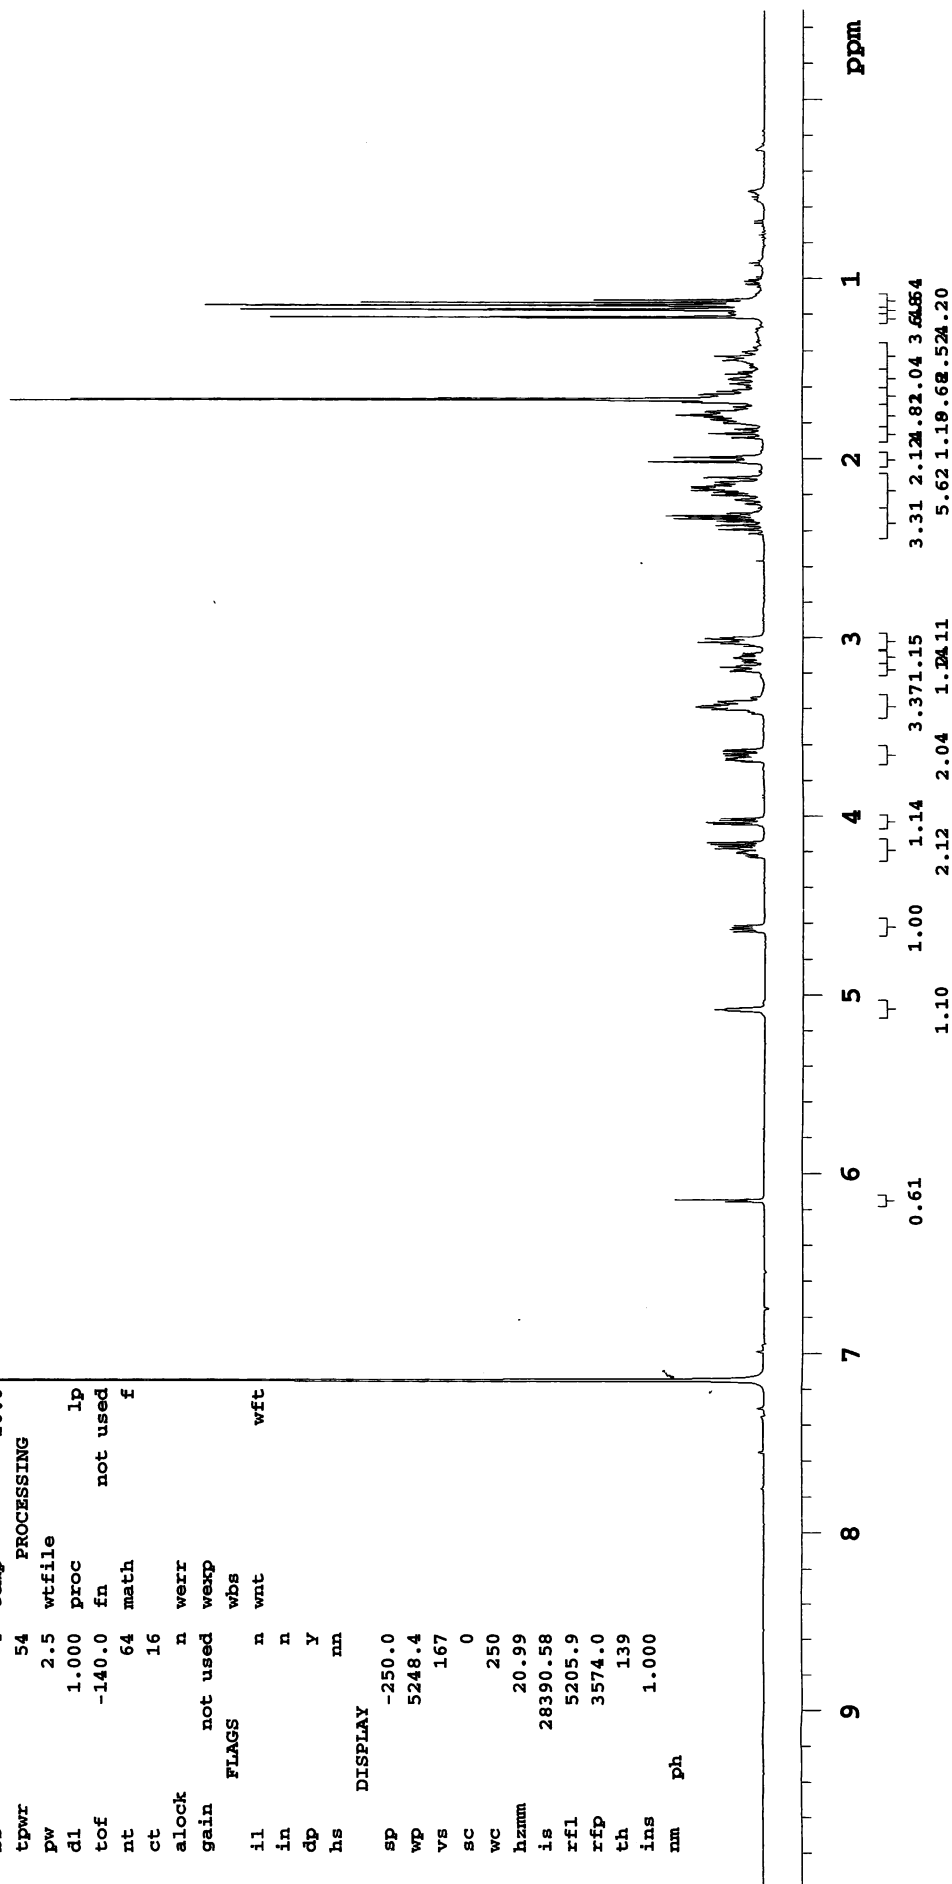

## STANDARD CARBON PARAMETERS

exp2 s2pul

|             |             |           |         |
|-------------|-------------|-----------|---------|
| SAMPLE      |             | DEC. & VT |         |
| date        | Dec 15 2007 | dfrq      | 499.862 |
| solvent     | Benzene     | dn        | H1      |
| file        | exp         | dpwr      | 27      |
| ACQUISITION |             | dof       | 0       |
| sfrq        | 125.704     | dm        | YYY     |
| tn          | Cl3         | dmm       | w       |
| at          | 1.298       | dmf       | 12579   |
| np          | 97994       | dseq      |         |
| sw          | 37735.8     | dres      | 1.0     |
| fb          | not used    | homo      | n       |
| bs          | 8           | temp      | 20.0    |
| PROCESSING  |             |           |         |
| tpwr        | 61          |           |         |
| pw          | 5.3         | lb        | 0.50    |
| d1          | 0.700       | wfile     |         |
| tof         | 1883.8      | proc      | ft      |
| nt          | 5120        | fn        | 131072  |
| ct          | 384         | math      | f       |
| alock       | n           |           |         |
| gain        | 56          | werr      | wft     |
| FLAGS       |             | wexp      | wft     |
| il          | n           | wbs       |         |
| in          | n           | wnt       |         |
| dp          | y           |           |         |
| hs          | nn          |           |         |
| DISPLAY     |             |           |         |
| sp          | -5031.9     |           |         |
| wp          | 37735.8     |           |         |
| vs          | 698         |           |         |
| sc          | 0           |           |         |
| wc          | 250         |           |         |
| hzmm        | 0.44        |           |         |
| is          | 500.00      |           |         |
| rfl         | 21120.2     |           |         |
| rfp         | 16088.3     |           |         |
| th          | 113         |           |         |
| ins         | 100.000     |           |         |
| nm          |             |           |         |
|             |             |           | ph      |

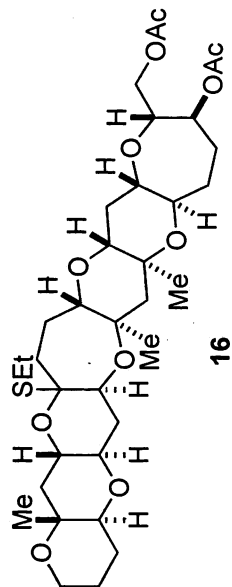

127.808  
128.192  
128.888

240 220 200 180 160 140 120 100 80 60 40 20 0 -20 ppm

YS-IV-100

File: home/vnmr1/vnmrsys/data/operator/December/YS-IV-100-10127.fid

Pulse Sequence: s2pul

Solvent: cdcl3

Temp. 20.0 C / 293.1 K

Operator: vnmr1

File: YS-IV-100-10127

VNMRS-600 "varian2"

Relax. delay 1.592 sec

Pulse 45.0 degrees

Acq. time 3.408 sec

Width 9615.4 Hz

24 repetitions

OBSERVE H1, 599.8683082 MHz

DATA PROCESSING

Line broadening 0.3 Hz

FT size 65536

Total time 5 min, 20 sec

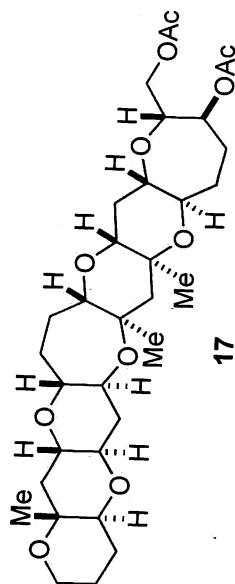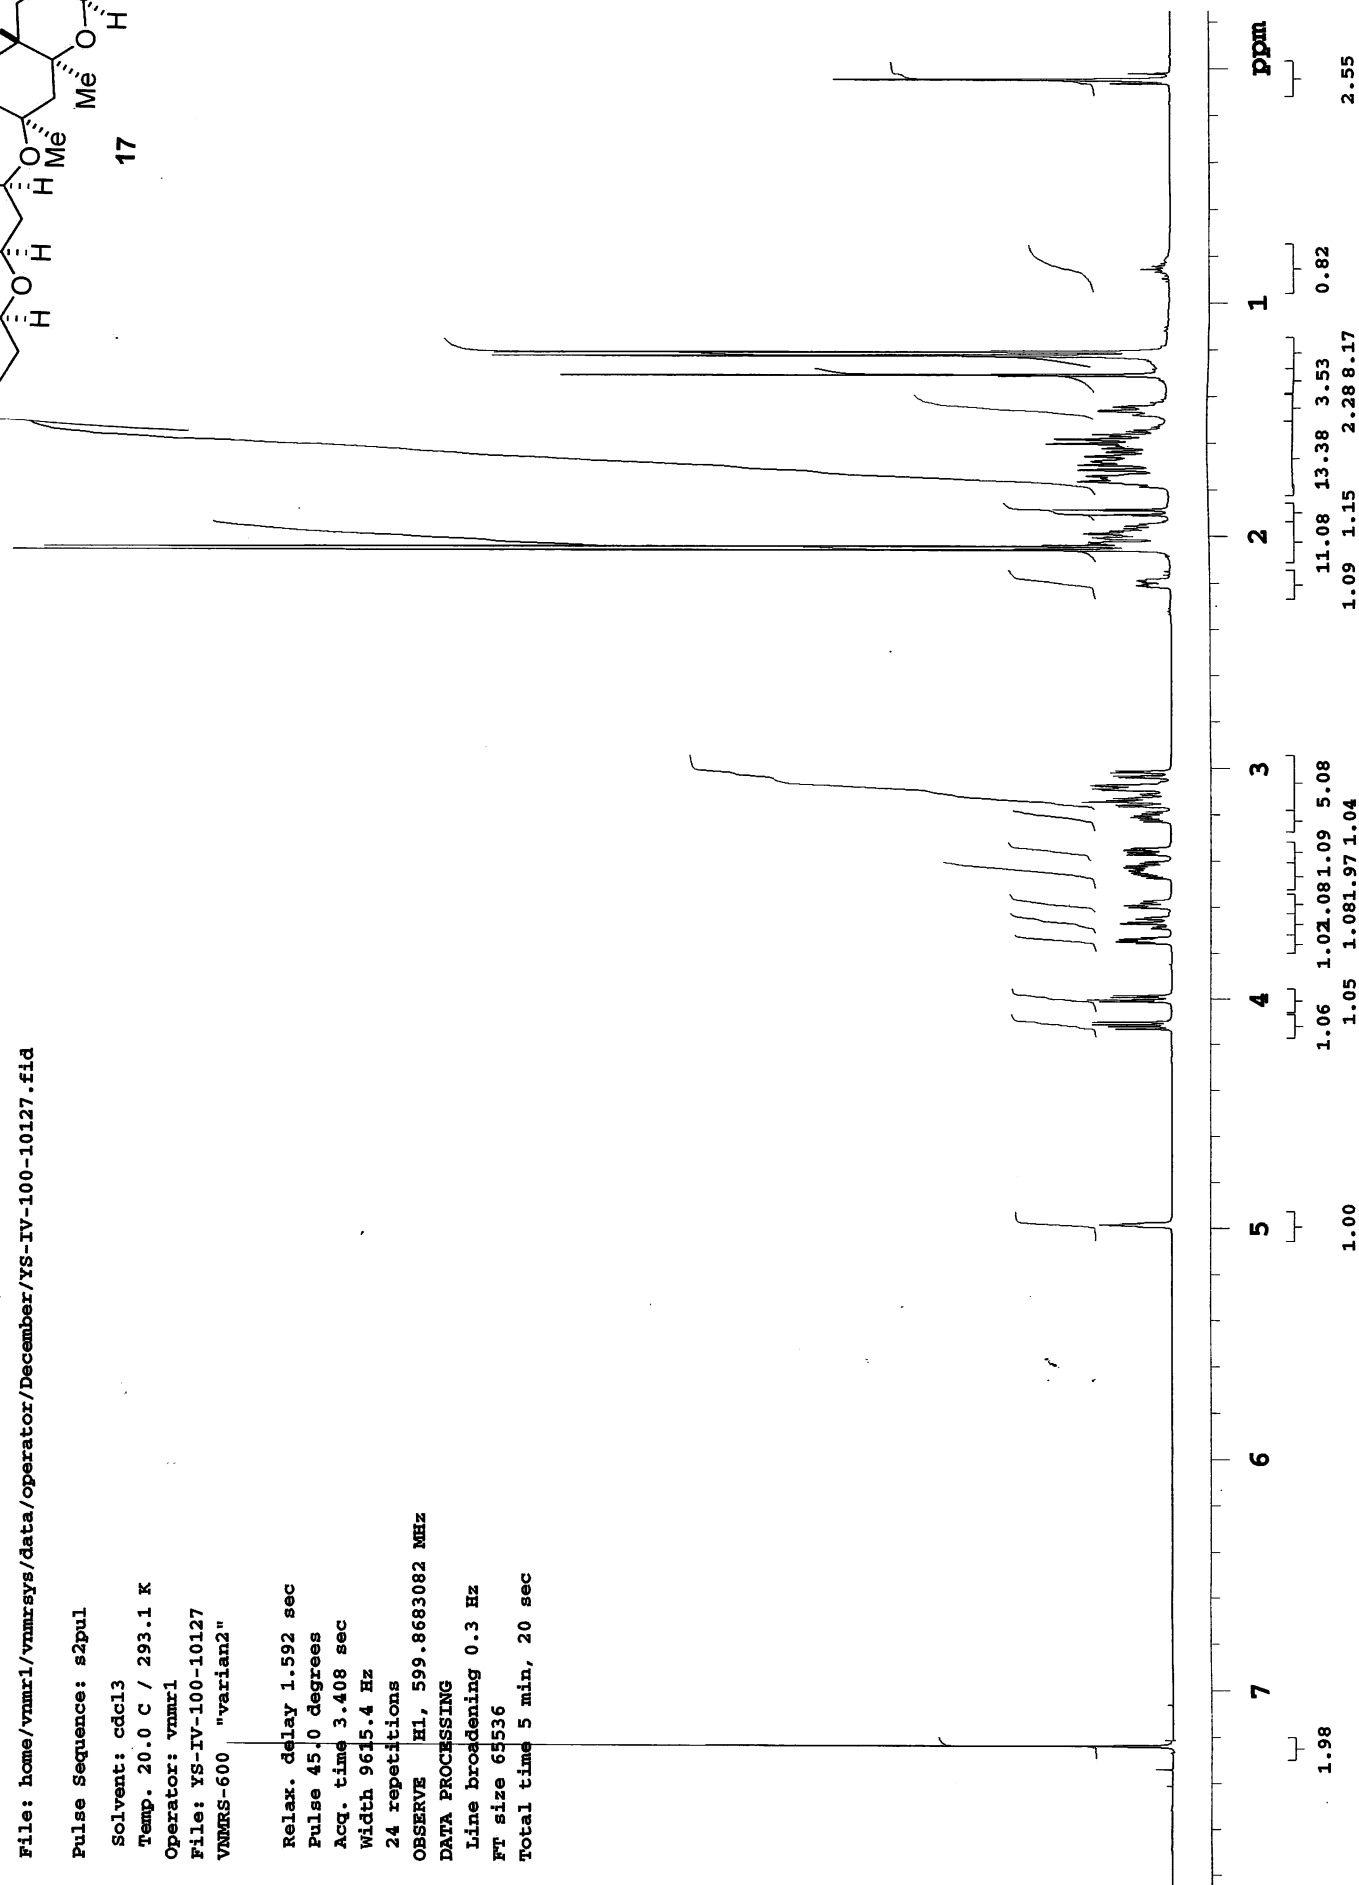

File: xp

Pulse Sequence: s2pul

Solvent: cdcl3

Temp. 20.0 C / 293.1 K

Operator: vmr1

VNMRS-600 "varian600"

Relax. delay 1.700 sec

Pulse 45.0 degrees

Acq. time 1.300 sec

Width 36764.7 Hz

736 repetitions

OBSERVE C13, 150.8370053 MHz

DECOUPLE H1, 599.8712968 MHz

Power 37 dB

continuously on

WALTZ-16 modulated

DATA PROCESSING

Line broadening 2.2 Hz

FT size 131072

Total time 4 hr, 10 min, 0 sec

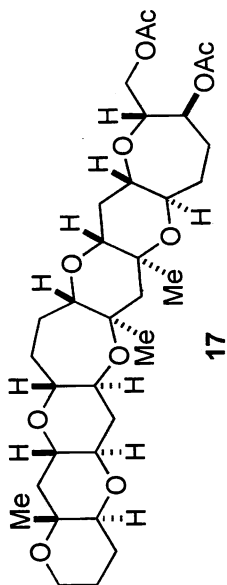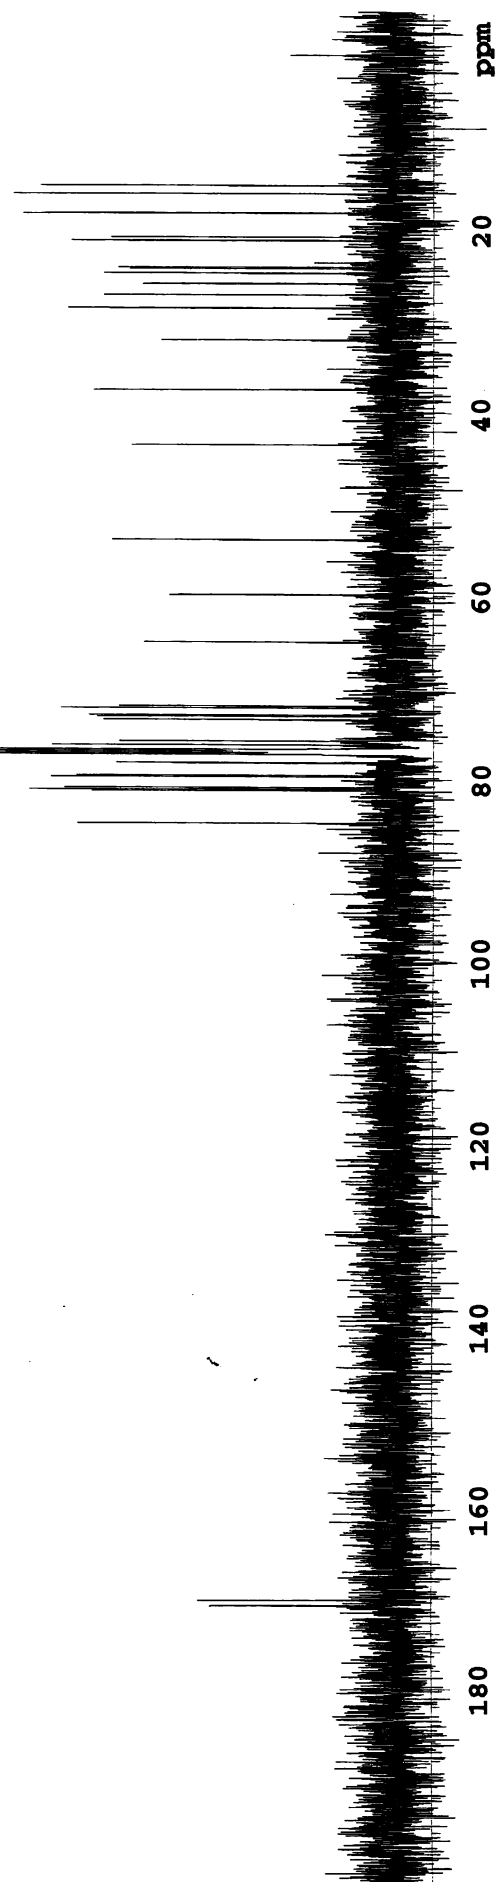

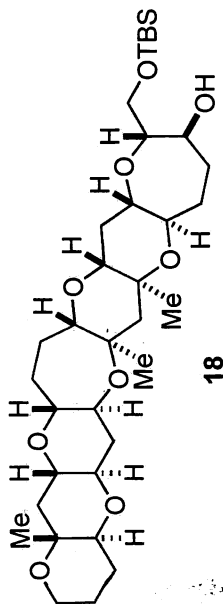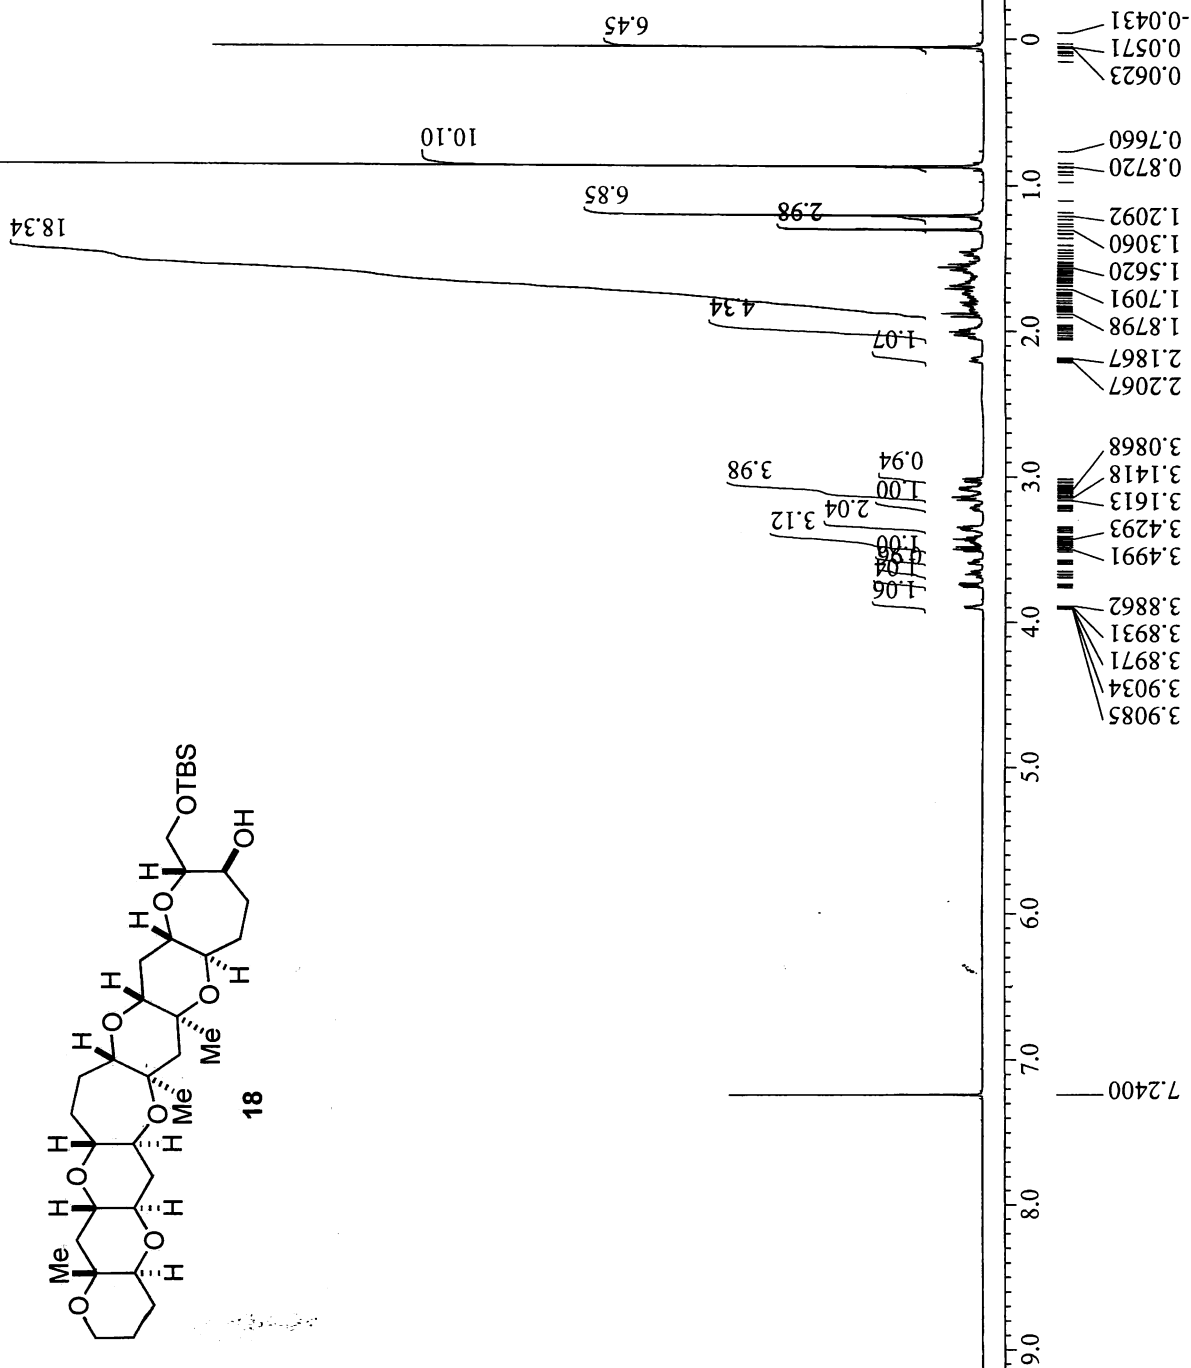

File Name = C:\Users\delta\Documents\J  
 Author = delta  
 Experiment = proton.jxp  
 Sample\_Id = YS-III-186  
 Solvent = CHLOROFORM-D  
 Creation\_Time = 22-SEP-2010 21:18:30  
 Revision\_Time = 22-SEP-2010 21:29:09  
 Current\_Time = 22-SEP-2010 21:29:34

Comment = single\_pulse  
 Data\_Format = 1D COMPLEX  
 Dim\_Size = 26214  
 Dim\_Title = Proton  
 Dim\_Units = [ppm]  
 Dimensions = X  
 Site = ECA600  
 Spectrometer = DELTA2\_NMR

Field\_Strength = 14.09636928 [T] (600 [MHz])  
 X\_Acq\_Duration = 2.9097984 [s]  
 X\_Domain = 1H  
 X\_Freq = 600.1723046 [MHz]  
 X\_Offset = 5 [ppm]  
 X\_Points = 32768  
 X\_Prescans = 1  
 X\_Resolution = 0.34366642 [Hz]  
 X\_Sweep = 11.26126126 [kHz]  
 X\_Sweep\_Clippped = 9.00900901 [kHz]  
 Irr\_Domain = Proton  
 Irr\_Freq = 600.1723046 [MHz]  
 Irr\_Offset = 5 [ppm]  
 Tri\_Domain = Proton  
 Tri\_Freq = 600.1723046 [MHz]  
 Tri\_Offset = 5 [ppm]  
 Clipped = FALSE  
 Mod\_Return = 1  
 Probe\_Recovery = 5 [us]  
 Scans = 8  
 Total\_Scans = 8

X\_90\_Width = 12.4 [us]  
 X\_Acq\_Time = 2.9097984 [s]  
 X\_Angle = 45 [deg]  
 X\_Atn = 3 [dB]  
 X\_Pulse = 6.2 [us]  
 Irr\_Mode = Off  
 Tri\_Mode = Off  
 Dante\_Preset = FALSE  
 Initial\_Wait = 1 [s]  
 Recvr\_Gain = 44  
 Relaxation\_Delay = 1 [s]  
 Repetition\_Time = 3.9097984 [s]  
 Temp\_Get = 22.3 [dC]

X : parts per Million : Proton : parts per Million

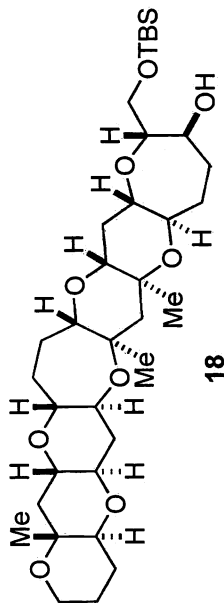

18

```

Filename = C:\Users\delta\Documents\J
Author = delta
Experiment = carbon.jpg
Sample_Id = YS-III-186
Solvent = CHLOROFORM-D
Creation_Time = 22-SEP-2010 21:20:51
Revision_Time = 22-SEP-2010 21:34:05
Current_Time = 22-SEP-2010 21:35:07

Comment = single pulse decoupled gat
Data_Format = 1D COMPLEX
Dim_Size = 26214
Dim_Title = Carbon13
Dim_Units = [ppm]
Dimensions = X
Site = ECA600
Spectrometer = DELTA2_NMR

Field_Strength = 14.09636928[T] (600[MHz])
X_Acq_Duration = 0.69206016[s]
X_Domain = 13C
X_Freq = 150.91343039[MHz]
X_Offset = 100[ppm]
X_Points = 32768
X_Prescans = 4
X_Resolution = 1.44496109[Hz]
X_Sweep = 47.34848485[KHz]
X_Sweep_Clipped = 37.87878788[KHz]
Irr_Domain = Proton
Irr_Freq = 600.1723046[MHz]
Irr_Offset = 5[ppm]
Clipped = FALSE
Mod_Return = 1
Probe_Recovery = 20[us]
Scans = 269
Total_Scans = 269

X_90_Width = 8.4[us]
X_Acq_Time = 0.69206016[s]
X_Angle = 30[deg]
X_Atn = 6.4[db]
X_Pulse = 2.8[us]
Irr_Atn_Dec = 18[db]
Irr_Atn_Noe = 18[db]
Irr_Noise = WALN
Irr_Fwidth = 76[us]
Decoupling = TRUE
Initial_Wait = 1[s]
Noe_Time = TRUE
Noe_Time = 2[s]
Recvr_Gain = 56
Relaxation_Delay = 2[s]
Repetition_Time = 2.69206016[s]
Temp_Get = 23.3[degC]
  
```

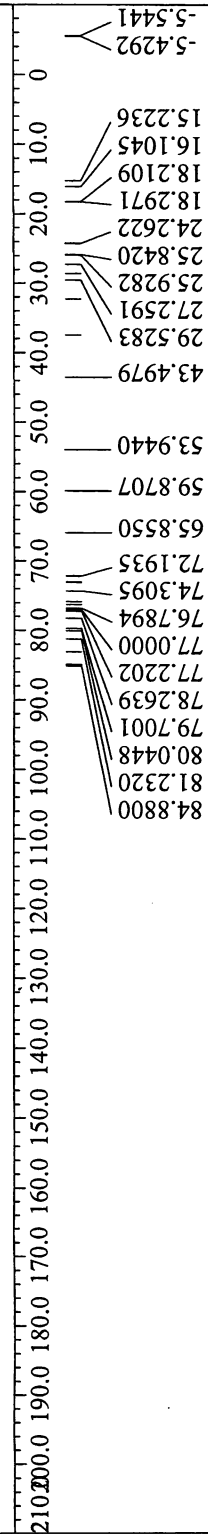

X : parts per Million : Carbon13 : parts per Million



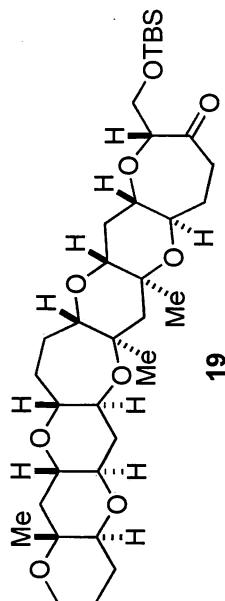

Filename = C:\Users\delta\Documents\J  
 Author = delta  
 Experiment = proton-jxp  
 Sample\_Id = YS-III-193  
 Solvent = CHLOROFORM-D  
 Creation\_Time = 2-JUL-2010 10:24:01  
 Revision\_Time = 2-JUL-2010 10:25:58  
 Current\_Time = 2-JUL-2010 10:26:23  
 Comment = single\_pulse  
 Data\_Format = 1D COMPLEX  
 Dim\_Size = 26214  
 Dim\_Title = Proton  
 Dim\_Units = [ppm]  
 Dimensions = X  
 Site = ECA600  
 Spectrometer = DELTA2\_NMR  
 Field\_Strength = 14.09636928[T] (600[MHz])  
 X\_Acq\_Duration = 2.9097984[s]  
 X\_Domain = 1H  
 X\_Freq = 600.1723046[MHz]  
 X\_Offset = 5[ppm]  
 X\_Points = 32768  
 X\_Prescans = 1  
 X\_Resolution = 0.34366642[Hz]  
 X\_Sweep = 11.26126126[KHz]  
 X\_Sweep\_Clippped = 9.00900901[KHz]  
 Irr\_Domain = Proton  
 Irr\_Freq = 600.1723046[MHz]  
 Irr\_Offset = 5[ppm]  
 Tri\_Domain = Proton  
 Tri\_Freq = 600.1723046[MHz]  
 Tri\_Offset = 5[ppm]  
 Clipped = FALSE  
 Mod\_Return = 1  
 Probe\_Recovery = 5[us]  
 Scans = 8  
 Total\_Scans = 8  
 X\_90\_Width = 12.4[us]  
 X\_Acq\_Time = 2.9097984[s]  
 X\_Angle = 45[deg]  
 X\_Atn = 3[dB]  
 X\_Pulse = 6.2[us]  
 Irr\_Mode = Off  
 Tri\_Mode = Off  
 Dante\_Preset = FALSE  
 Initial\_Wait = 1[s]  
 Recvr\_Gain = 40  
 Relaxation\_Delay = 1[s]  
 Repetition\_Time = 3.9097984[s]  
 Temp\_Get = 22.3[dc]

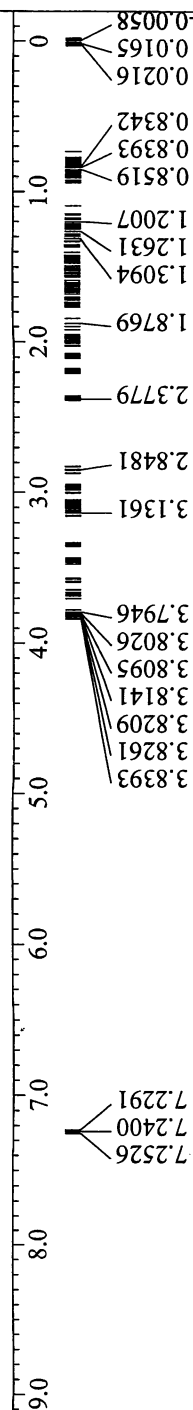

X : parts per Million : Proton : parts per Million

YS-III-193-13C

File: xp

Pulse Sequence: s2pul

Solvent: cdcl3

Temp. 20.0 C / 293.1 K

Operator: vnmr1

VNMR5-600 "varian600"

Relax. delay 1.700 sec

Pulse 45.0 degrees

Acq. time 1.300 sec

Width 36764.7 Hz

488 repetitions

OBSERVE C13, 150.8370056 MHz

DECOUPLE H1, 599.8712968 MHz

Power 37 dB

continuously on

WALTZ-16 modulated

DATA PROCESSING

Line broadening 2.0 Hz

Ft size 131072

Total time 1 hr, 40 min, 0 sec

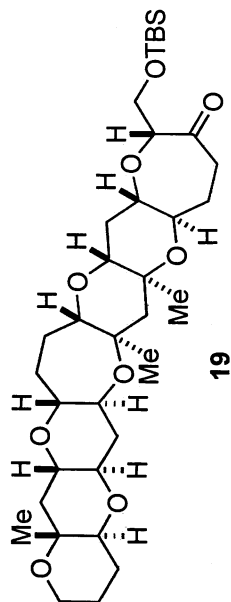

19

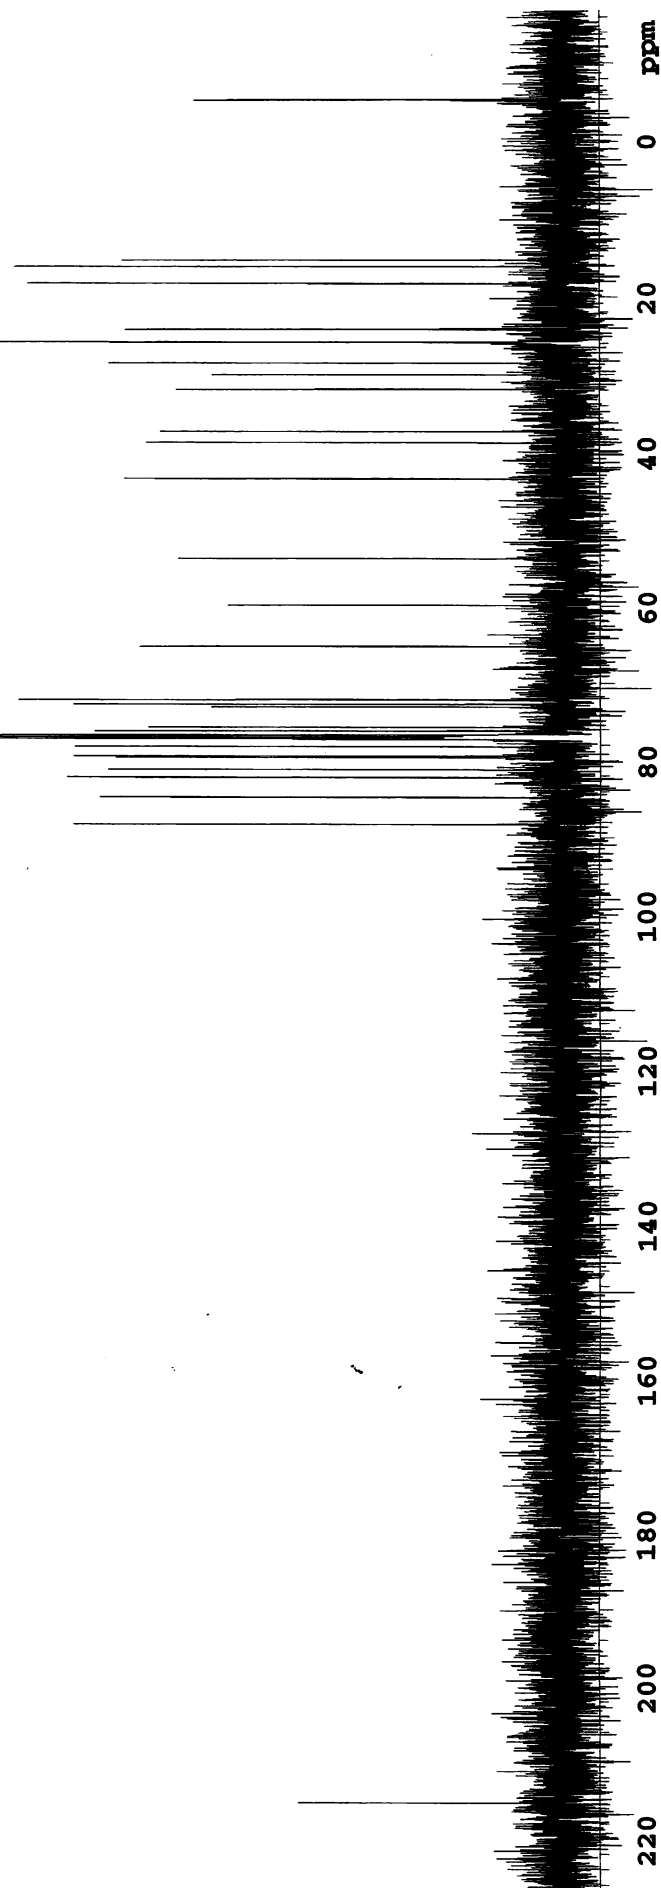

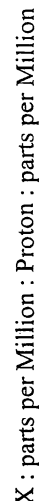

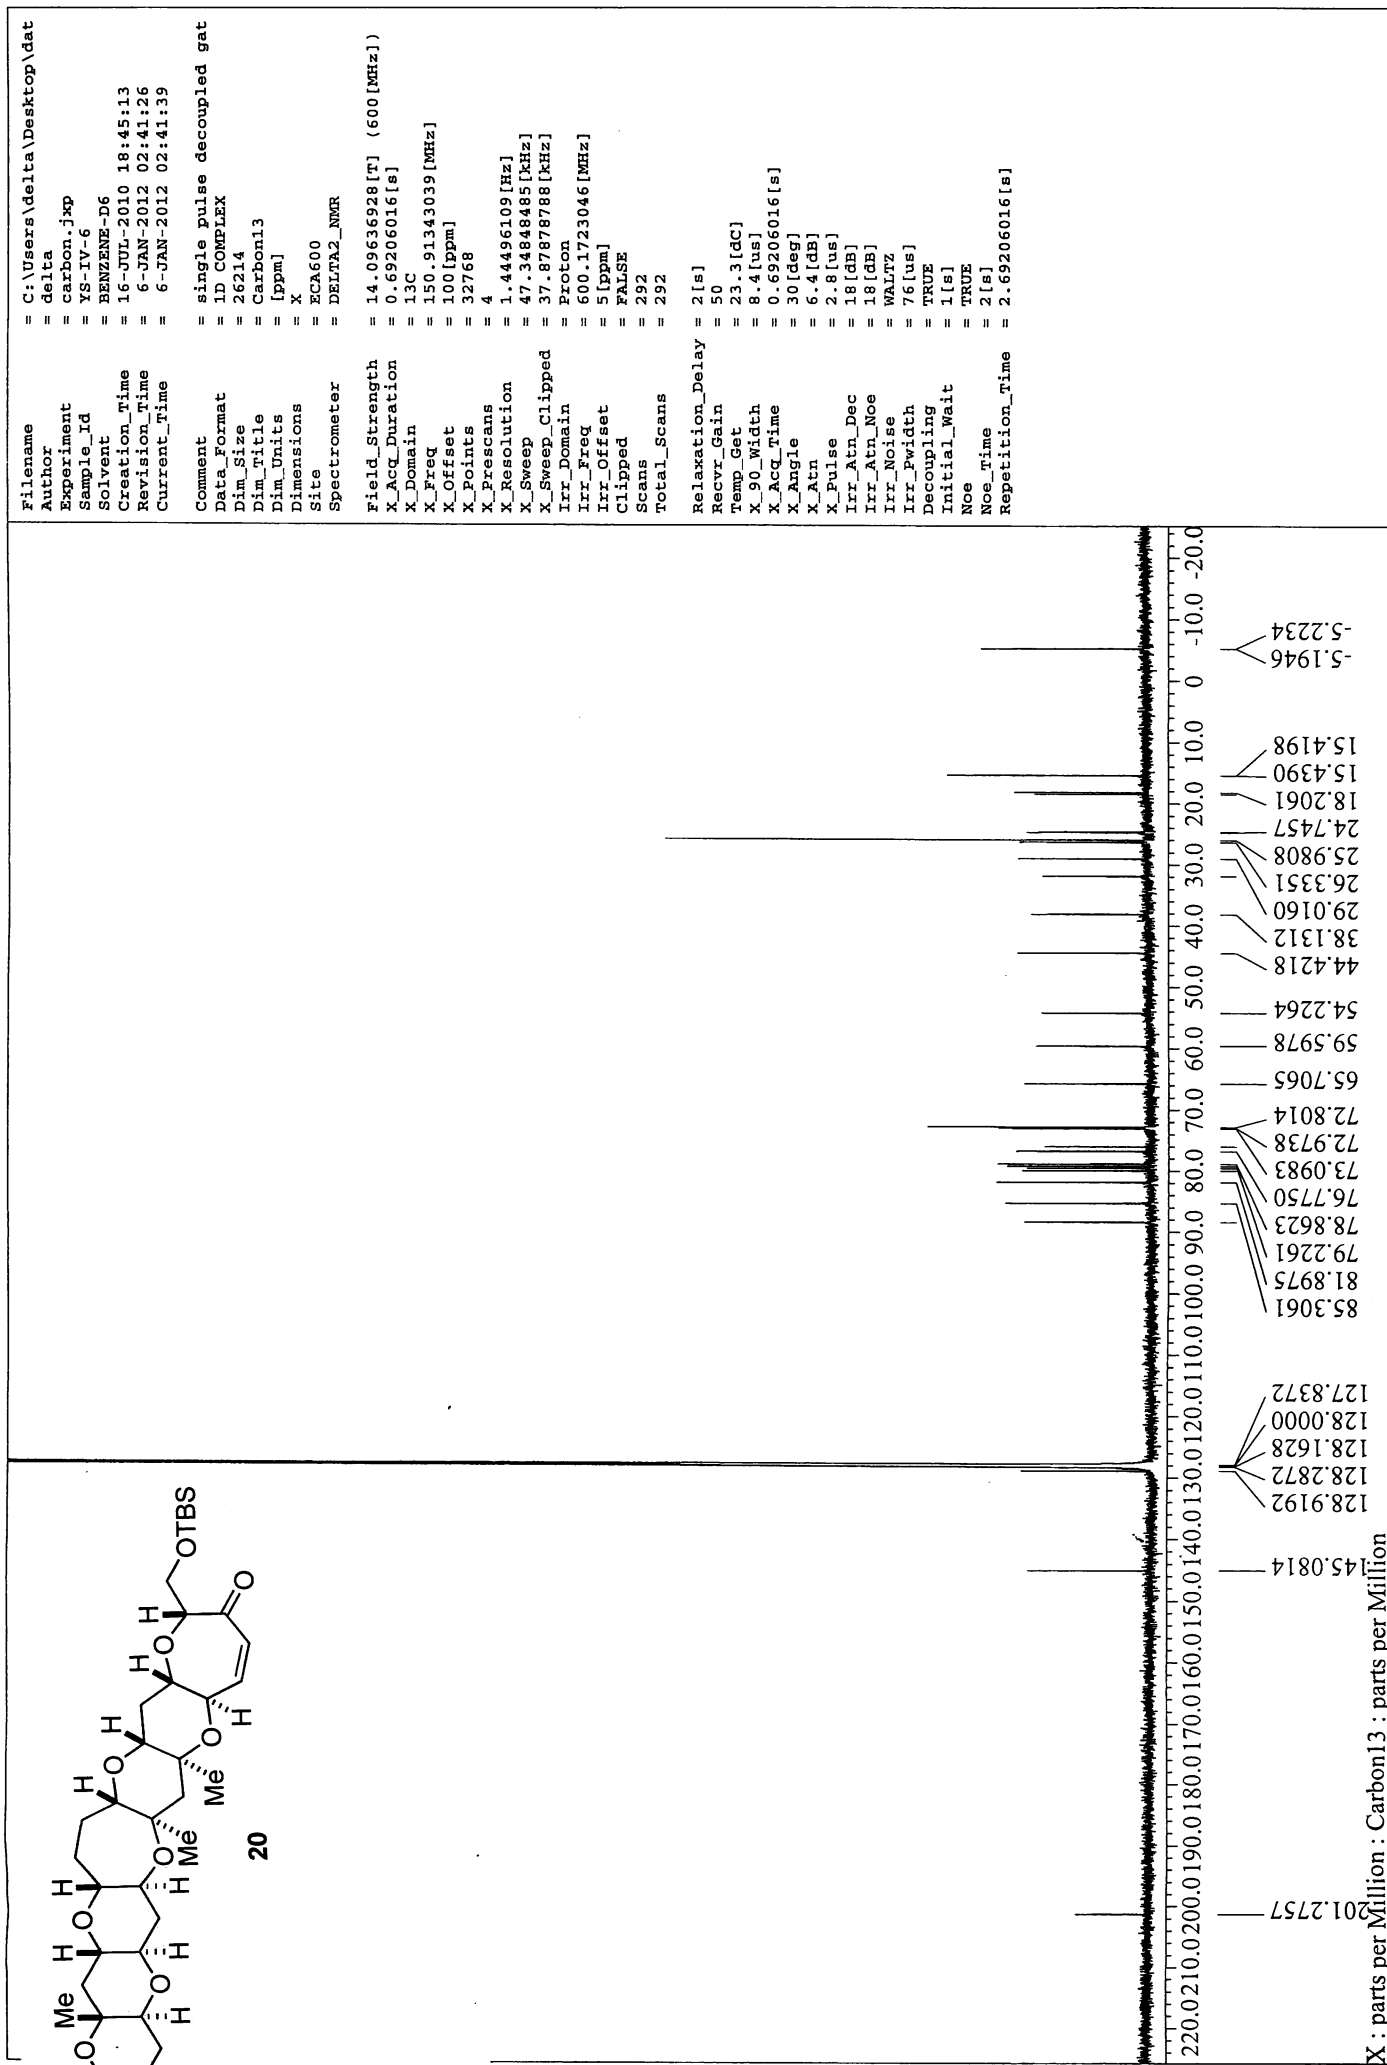

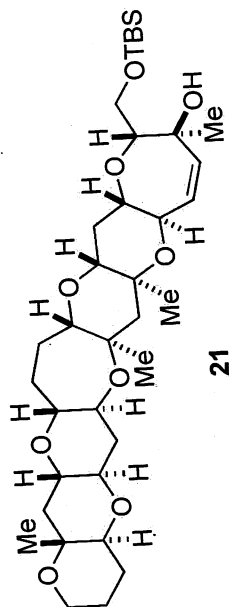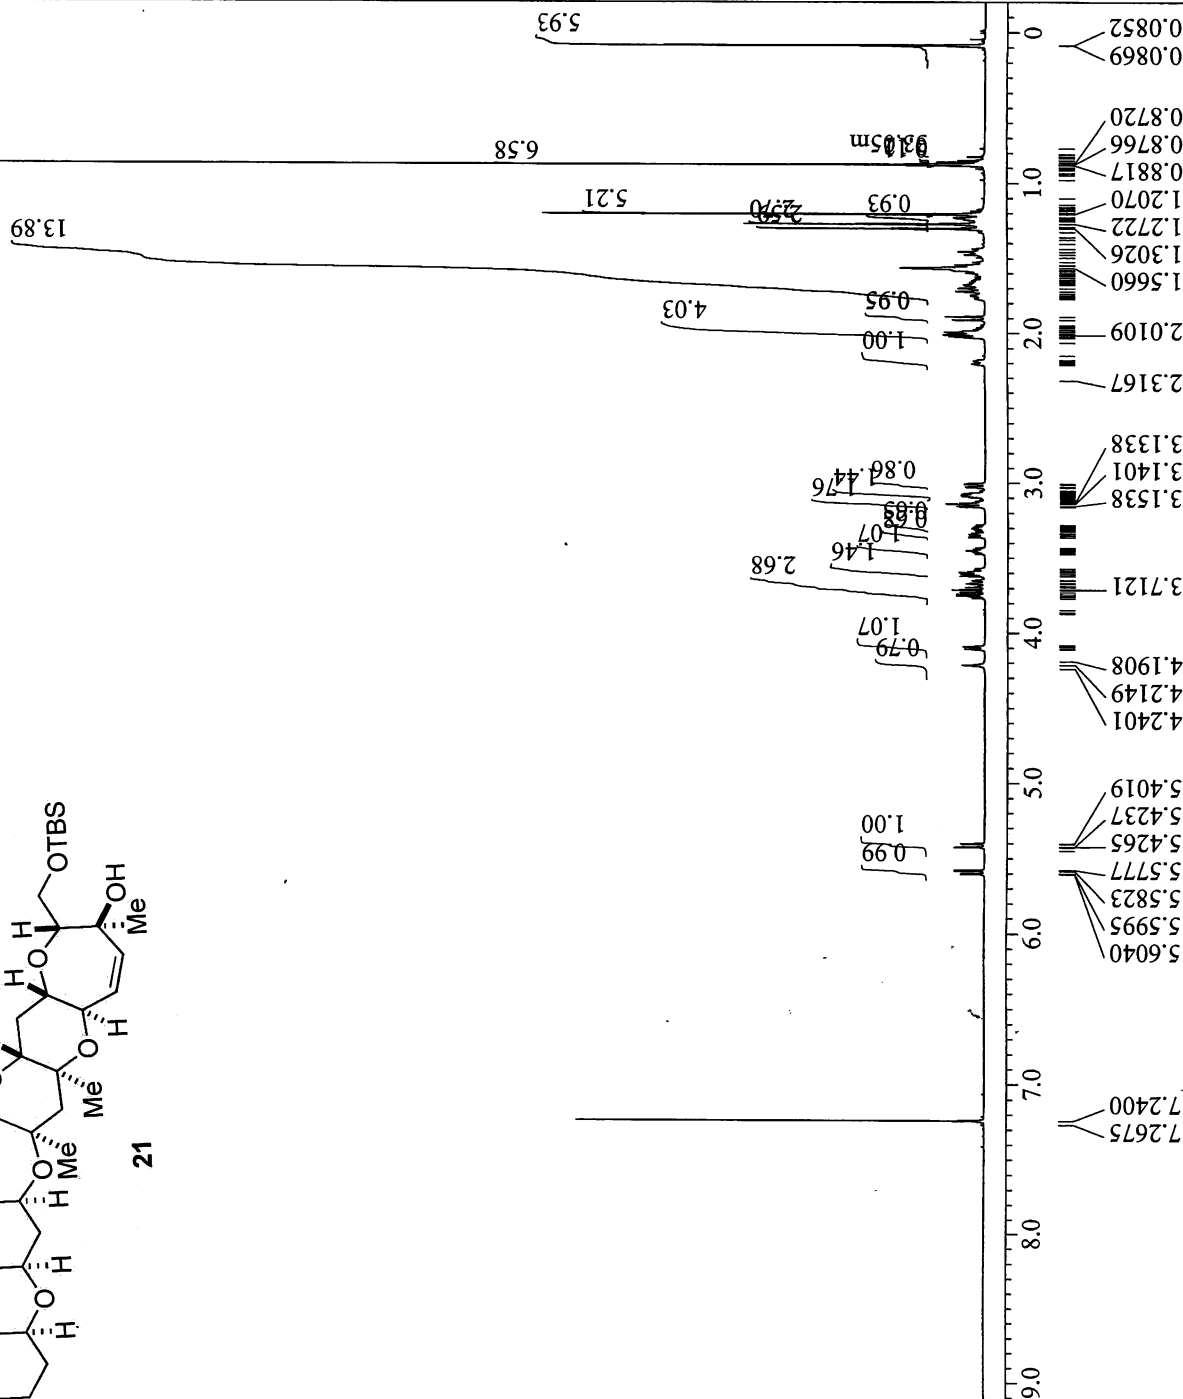

Filename = C:\Users\delta\Documents\J  
 Author = delta  
 Experiment = proton.jpg  
 Sample\_Id = YS-III-200  
 Solvent = CHLOROFORM-D  
 Creation\_Time = 15-JUL-2010 16:06:04  
 Revision\_Time = 15-JUL-2010 16:08:34  
 Current\_Time = 15-JUL-2010 16:08:55  
 Comment = single pulse  
 Data\_Format = 1D COMPLEX  
 Dim\_Size = 26214  
 Dim\_Title = Proton  
 Dim\_Units = [ppm]  
 Dimensions = X  
 Site = ECA600  
 Spectrometer = DELTA2\_NMR  
 Field\_Strength = 14.09636928[T] (600[MHz])  
 X\_Acq\_Duration = 2.9097984[s]  
 X\_Domain = 1H  
 X\_Freq = 600.1723046[MHz]  
 X\_Offset = 5[ppm]  
 X\_Points = 32768  
 X\_Prescans = 1  
 X\_Resolution = 0.34366642[Hz]  
 X\_Sweep = 11.26126126[kHz]  
 X\_Sweep\_Clipped = 9.00900901[kHz]  
 Irr\_Domain = Proton  
 Irr\_Freq = 600.1723046[MHz]  
 Irr\_Offset = 5[ppm]  
 Tri\_Domain = Proton  
 Tri\_Freq = 600.1723046[MHz]  
 Tri\_Offset = 5[ppm]  
 Clipped = FALSE  
 Mod\_Return = 1  
 Probe\_Recovery = 5[us]  
 Scans = 8  
 Total\_Scans = 8  
 X\_90\_Width = 12.4[us]  
 X\_Acq\_Time = 2.9097984[s]  
 X\_Angle = 45[deg]  
 X\_Atn = 3[db]  
 X\_Pulse = 6.2[us]  
 Irr\_Mode = Off  
 Tri\_Mode = Off  
 Dante\_Preset = FALSE  
 Initial\_Wait = 1[s]  
 Recvr\_Gain = 44  
 Relaxation\_Delay = 1[s]  
 Repetition\_Time = 3.9097984[s]  
 Temp\_Get = 22.2[dc]

X : parts per Million : Proton : parts per Million

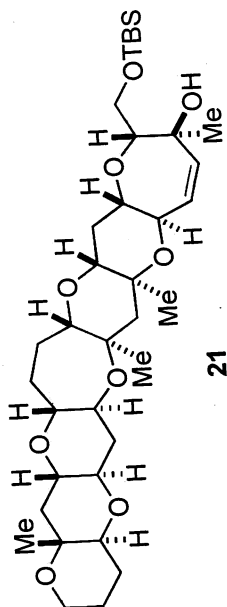

Filename = C:\Users\delta\Documents\J  
 Author = delta  
 Experiment = carbon.jxp  
 Sample\_Id = YS-III-200-13C  
 Solvent = BENZENE-D6  
 Creation\_Time = 27-SEP-2010 14:05:33  
 Revision\_Time = 27-SEP-2010 14:14:53  
 Current\_Time = 27-SEP-2010 14:16:09  
 Comment = single pulse decoupled gat  
 Data\_Format = 1D COMPLEX  
 Dim\_Size = 26214  
 Dim\_Title = Carbon13  
 Dim\_Units = [ppm]  
 Dimensions = X  
 Site = ECA600  
 Spectrometer = DELTA2\_NMR  
 Field\_Strength = 14.09636928[T] (600[MHz])  
 X\_Acq\_Duration = 0.69206016[s]  
 X\_Domain = 13C  
 X\_Freq = 150.91343039[MHz]  
 X\_Offset = 100[ppm]  
 X\_Points = 32768  
 X\_Prescans = 4  
 X\_Resolution = 1.44496109[Hz]  
 X\_Sweep = 47.34848485[kHz]  
 X\_Sweep\_Clippped = 37.87878788[kHz]  
 Irr\_Domain = Proton  
 Irr\_Freq = 600.1723046[MHz]  
 Irr\_Offset = 5[ppm]  
 Clipped = FALSE  
 Mod\_Return = 1  
 Probe\_Recovery = 20[us]  
 Scans = 166  
 Total\_Scans = 166  
 X\_90\_Width = 8.4[us]  
 X\_Acq\_Time = 0.69206016[s]  
 X\_Angle = 30[deg]  
 X\_Atn = 6.4[db]  
 X\_Pulse = 2.8[us]  
 Irr\_Atn\_Dec = 18[db]  
 Irr\_Atn\_Noe = 18[db]  
 Irr\_Noise = WALTZ  
 Irr\_Fwidth = 76[us]  
 Decoupling = TRUE  
 Initial\_Wait = 1[s]  
 Noe = TRUE  
 Noe\_Time = 2[s]  
 Recvr\_Gain = 50  
 Relaxation\_Delay = 2[s]  
 Repetition\_Time = 2.69206016[s]  
 Temp\_Get = 22.9[dc]

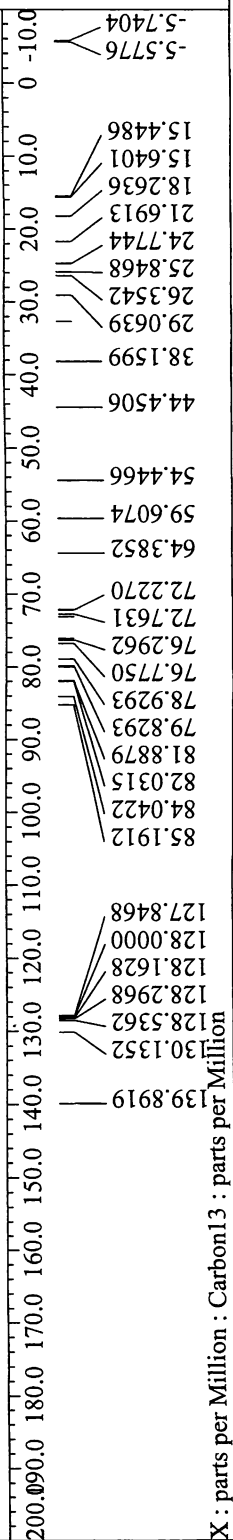

X : parts per Million : Carbon13 : parts per Million

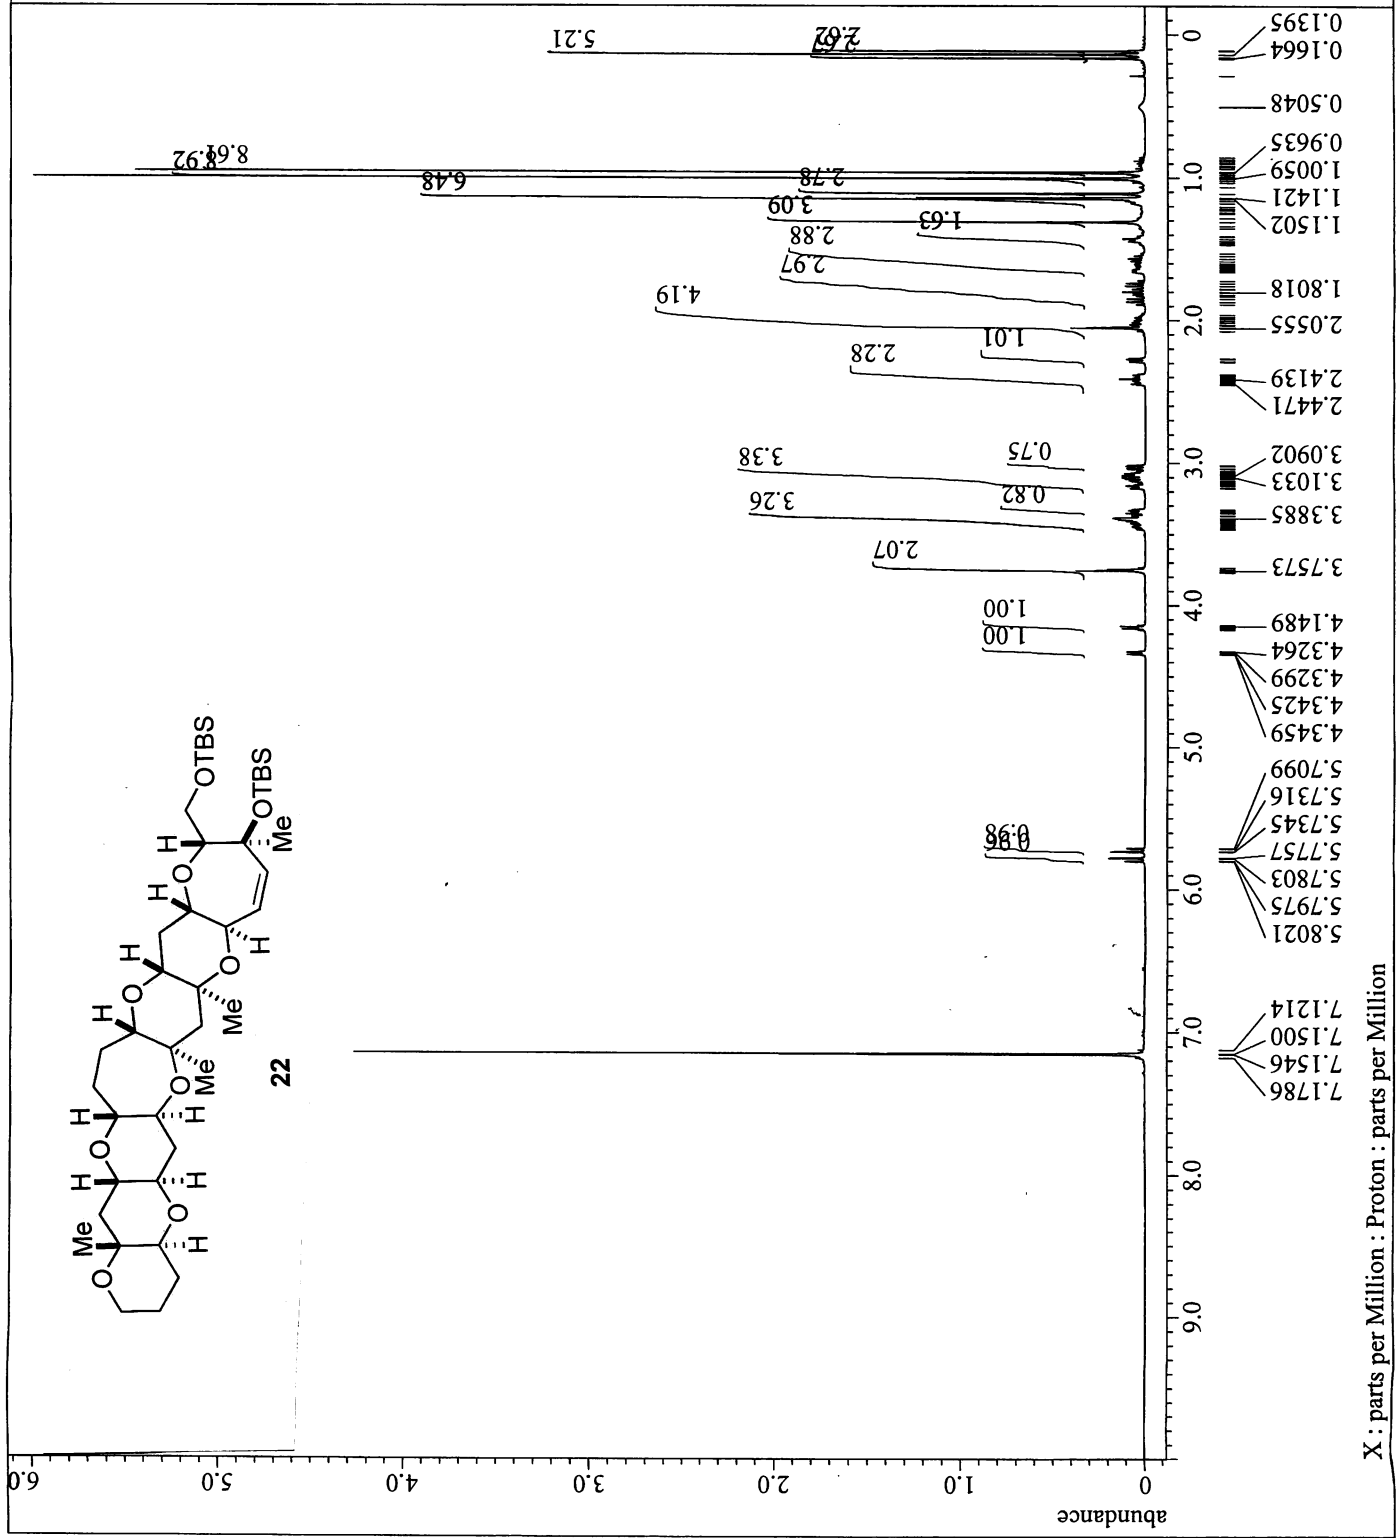

Filename = C:\Users\delta\Documents\J  
 Author = delta  
 Experiment = proton-jxp  
 Sample\_Id = YS-IV-2  
 Solvent = BENZENE-D6  
 Creation\_Time = 14-JUL-2010 16:40:36  
 Revision\_Time = 14-JUL-2010 16:43:34  
 Current\_Time = 14-JUL-2010 16:44:06  
 Comment = single\_pulse  
 Data\_Format = 1D COMPLEX  
 Dim\_Size = 26214  
 Dim\_Title = Proton  
 Dim\_Units = [ppm]  
 Dimensions = X  
 Site = ECA600  
 Spectrometer = DELTA2\_NMR  
 Field\_Strength = 14.09636928[T] (600 [MHz])  
 X\_Acq\_Duration = 2.9097984[s]  
 X\_Domain = 1H  
 X\_Freq = 600.1723046 [MHz]  
 X\_Offset = 5 [ppm]  
 X\_Points = 32768  
 X\_Prescans = 1  
 X\_Resolution = 0.34366642 [Hz]  
 X\_Sweep = 11.26126126 [kHz]  
 X\_Sweep\_Clip = 9.00900901 [kHz]  
 X\_Sweep\_Clip\_Delta = 0.34366642 [Hz]  
 Irr\_Freq = 600.1723046 [MHz]  
 Irr\_Domain = Proton  
 Irr\_Offset = 5 [ppm]  
 Tri\_Domain = Proton  
 Tri\_Freq = 600.1723046 [MHz]  
 Tri\_Offset = 5 [ppm]  
 Clipped = FALSE  
 Mod\_Return = 1  
 Probe\_Recovery = 5 [us]  
 Scans = 8  
 Total\_Scans = 8  
 X\_90\_Width = 12.4 [us]  
 X\_Acq\_Time = 2.9097984 [s]  
 X\_Angle = 45 [deg]  
 X\_Atn = 3 [dB]  
 X\_Pulse = 6.2 [us]  
 Irr\_Mode = Off  
 Tri\_Mode = Off  
 Dante\_Preset = FALSE  
 Initial\_Wait = 1 [s]  
 Recvr\_Gain = 40  
 Relaxation\_Delay = 1 [s]  
 Repetition\_Time = 3.9097984 [s]  
 Temp\_Get = 22.3 [C]

X : parts per Million : Proton : parts per Million

YS-IV-2-13C

1000 (2) 1.000

File: xp

Pulse Sequence: s2pul

Solvent: cdcl3

Temp. 20.0 C / 293.1 K

Operator: vnmr1

VNMRS-600 "varian600"

Relax. delay 1.700 sec

Pulse 45.0 degrees

Acq. time 1.300 sec

Width 36764.7 Hz

1200 repetitions

OBSERVE C13, 150.8370071 MHz

DECOUPLE H1, 599.8712968 MHz

Power 37 dB

continuously on

WALTZ-16 modulated

DATA PROCESSING

Line broadening 1.0 Hz

FT size 131072

Total time 1 hr, 40 min, 0 sec

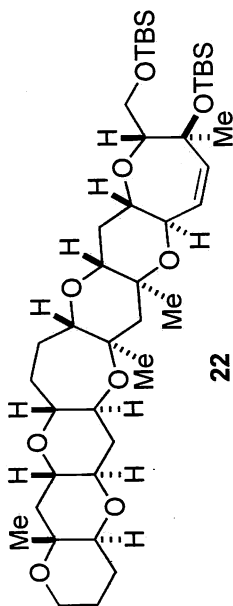

22



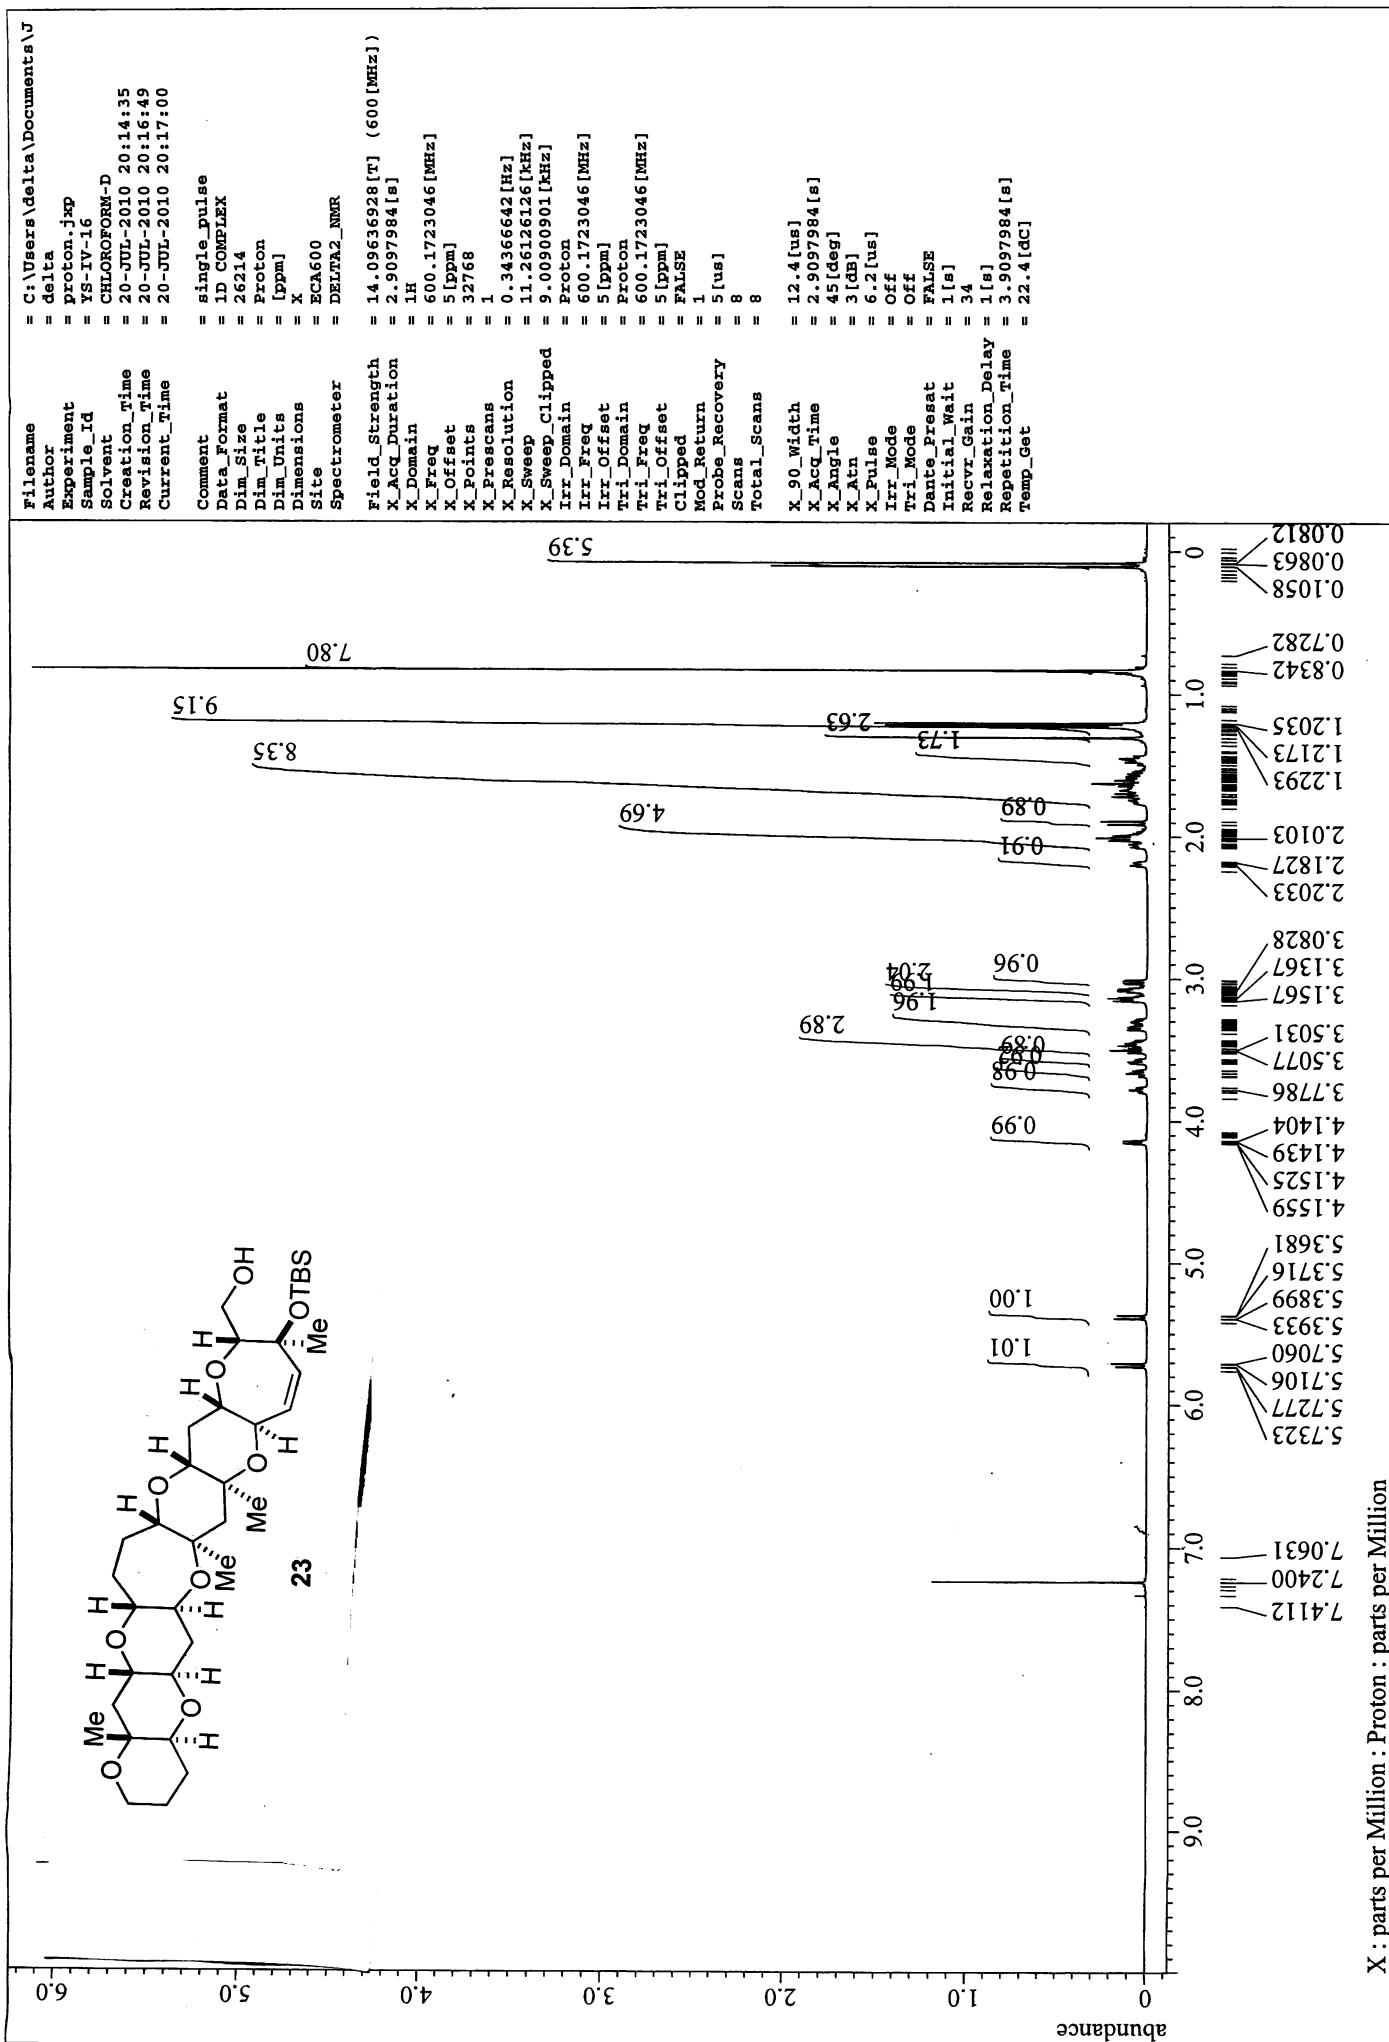

X: parts per Million : Proton : parts per Million

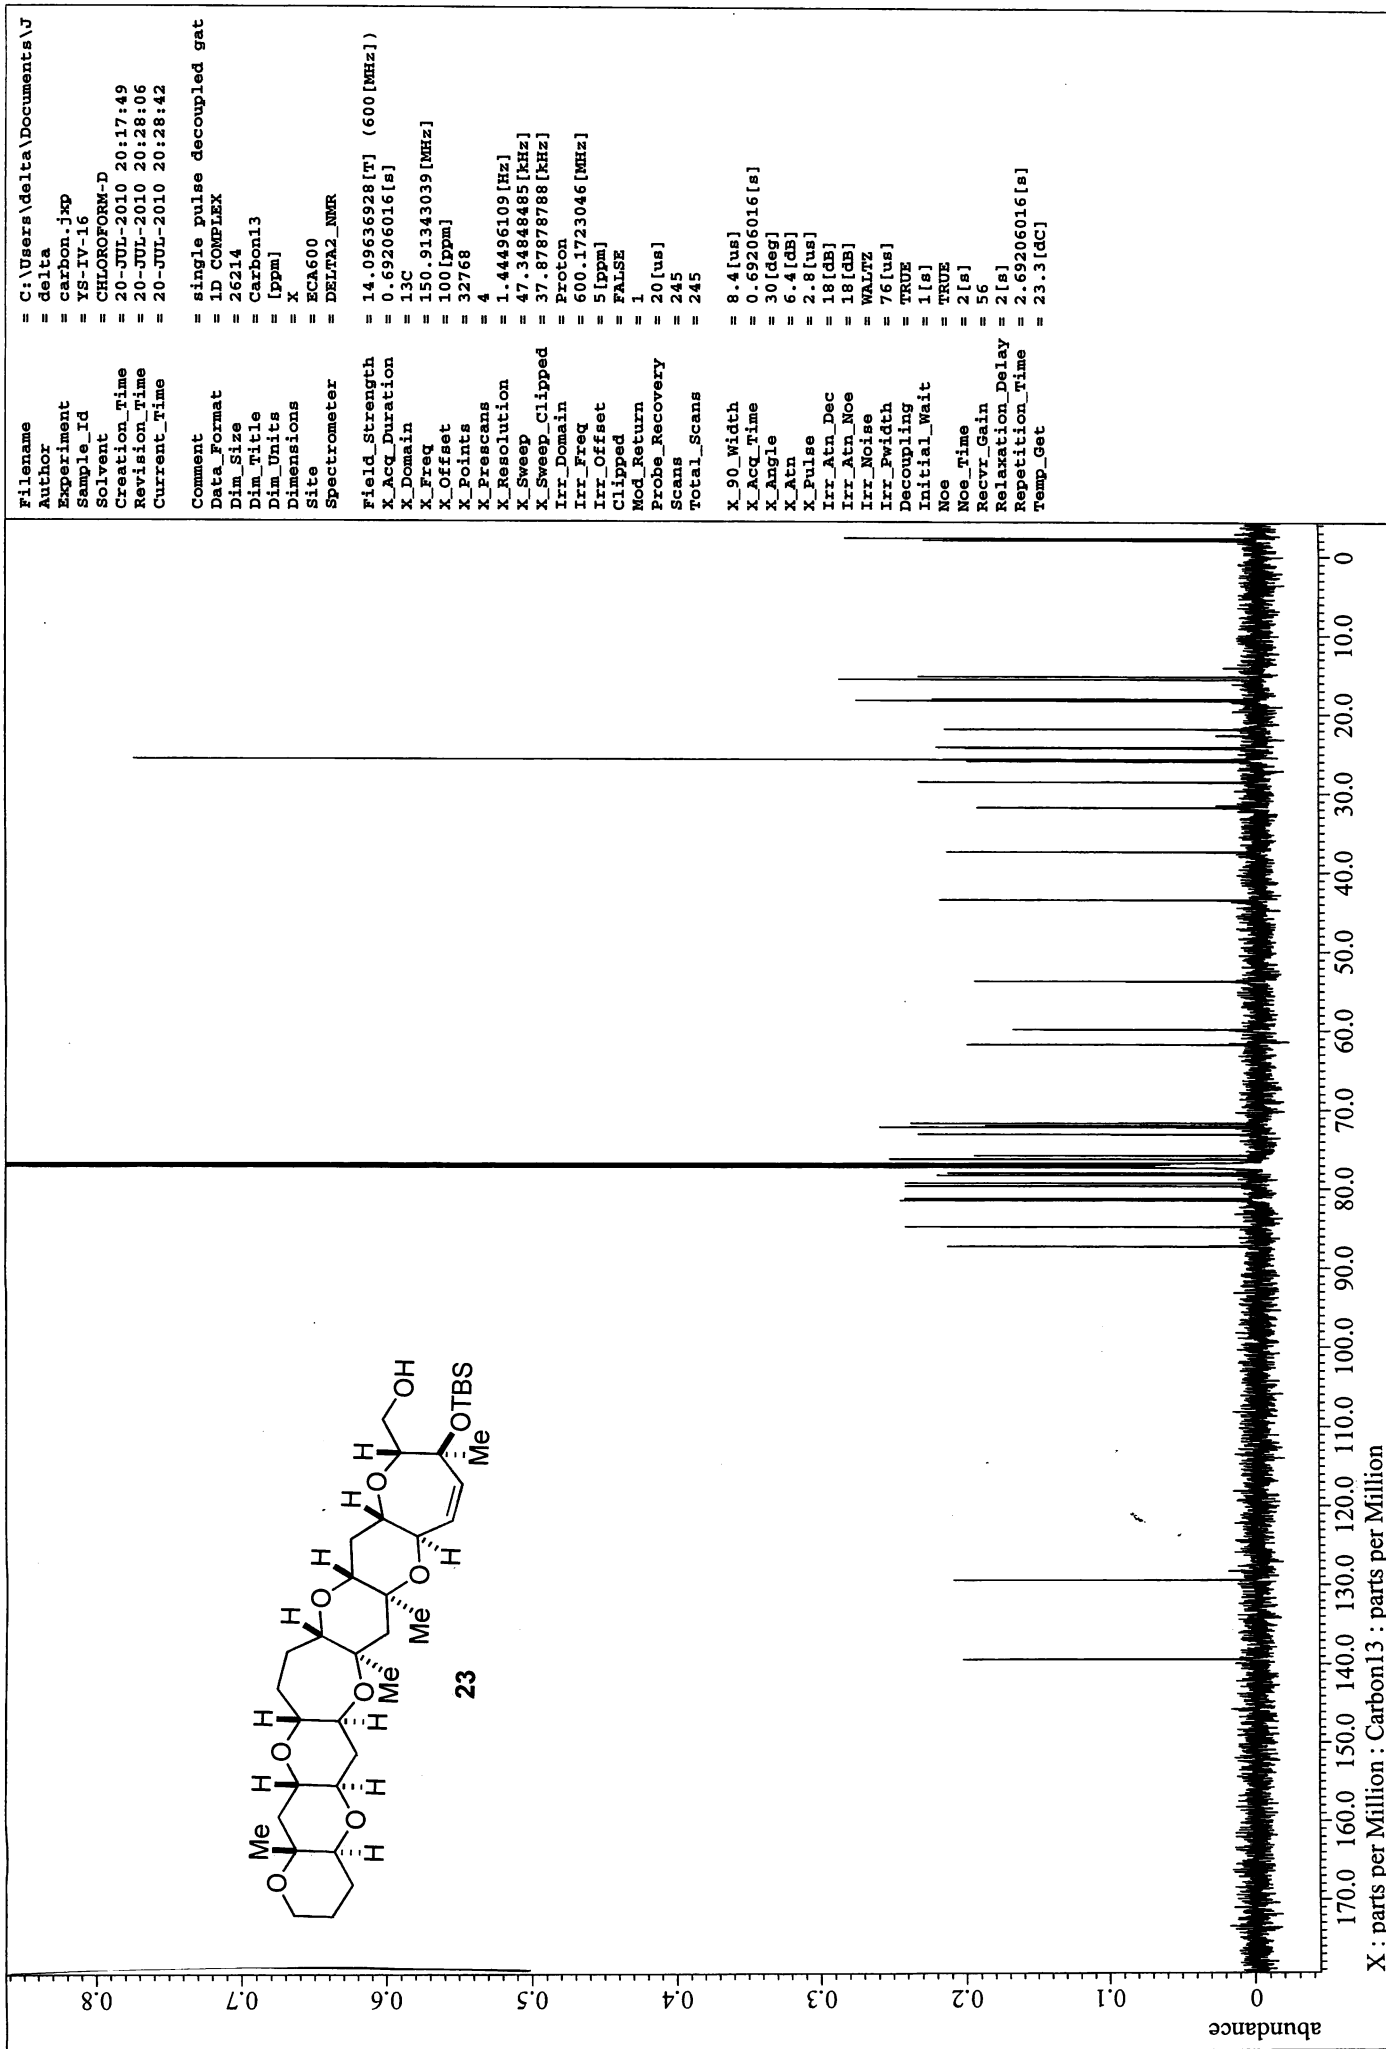

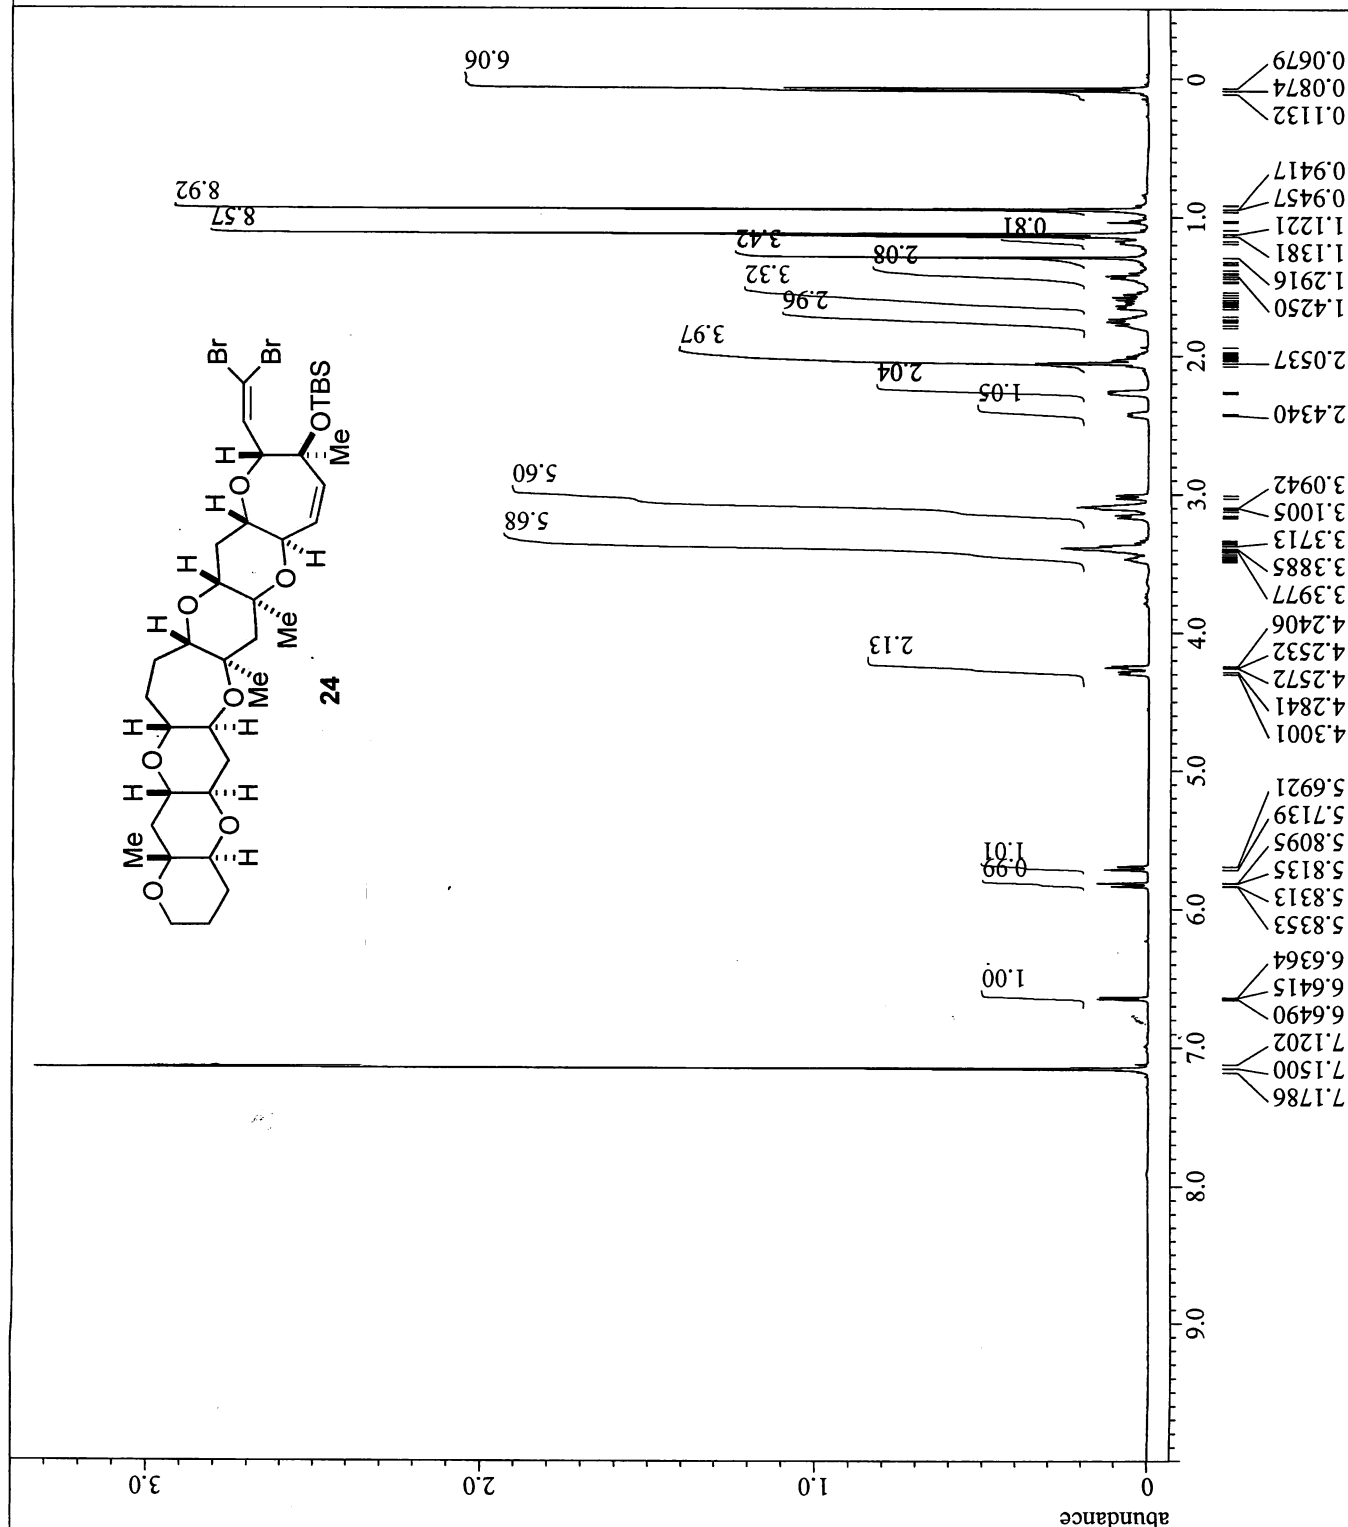

|                  |                              |
|------------------|------------------------------|
| File Name        | = C:\Users\delta\Documents\  |
| Author           | = delta                      |
| Experiment       | = proton.jpg                 |
| Sample_Id        | = YS-IV-18                   |
| Solvent          | = BENZENE-D6                 |
| Creation_Time    | = 21-JUL-2010 23:37:10       |
| Revision_Time    | = 21-JUL-2010 23:38:42       |
| Current_Time     | = 21-JUL-2010 23:38:48       |
| Comment          | = single pulse               |
| Data_Format      | = 1D COMPLEX                 |
| Dim_Size         | = 26214                      |
| Dim_Title        | = Proton                     |
| Dim_Units        | = [ppm]                      |
| Dimensions       | = X                          |
| Site             | = ECA600                     |
| Spectrometer     | = DELTA_NMR                  |
| Field_Strength   | = 14.09636928[T] (600 [MHz]) |
| X_Acq_Duration   | = 2.9097984[s]               |
| X_Domain         | = 1H                         |
| X_Freq           | = 600.1723046 [MHz]          |
| X_Offset         | = 5 [ppm]                    |
| X_Points         | = 32768                      |
| X_Prescans       | = 1                          |
| X_Resolution     | = 0.34366642 [Hz]            |
| X_Sweep          | = 11.26126126 [kHz]          |
| X_Sweep_Clippped | = 9.00900901 [kHz]           |
| Irr_Domain       | = Proton                     |
| Irr_Freq         | = 600.1723046 [MHz]          |
| Irr_Offset       | = 5 [ppm]                    |
| Tri_Domain       | = Proton                     |
| Tri_Freq         | = 600.1723046 [MHz]          |
| Tri_Offset       | = 5 [ppm]                    |
| Clippped         | = FALSE                      |
| Mod_Return       | = 1                          |
| Probe_Recovery   | = 5 [us]                     |
| Scans            | = 8                          |
| Total_Scans      | = 8                          |
| X_90_Width       | = 12.4 [us]                  |
| X_Acq_Time       | = 2.9097984 [s]              |
| X_Angle          | = 45 [deg]                   |
| X_Atn            | = 3 [dB]                     |
| X_Pulse          | = 6.2 [us]                   |
| Irr_Mode         | = Off                        |
| Tri_Mode         | = Off                        |
| Dante_Presat     | = FALSE                      |
| Initial_Wait     | = 1 [s]                      |
| Recvr_Gain       | = 30                         |
| Relaxation_Delay | = 1 [s]                      |
| Repetition_Time  | = 3.9097984 [s]              |
| Temp_Get         | = 22.5 [dC]                  |

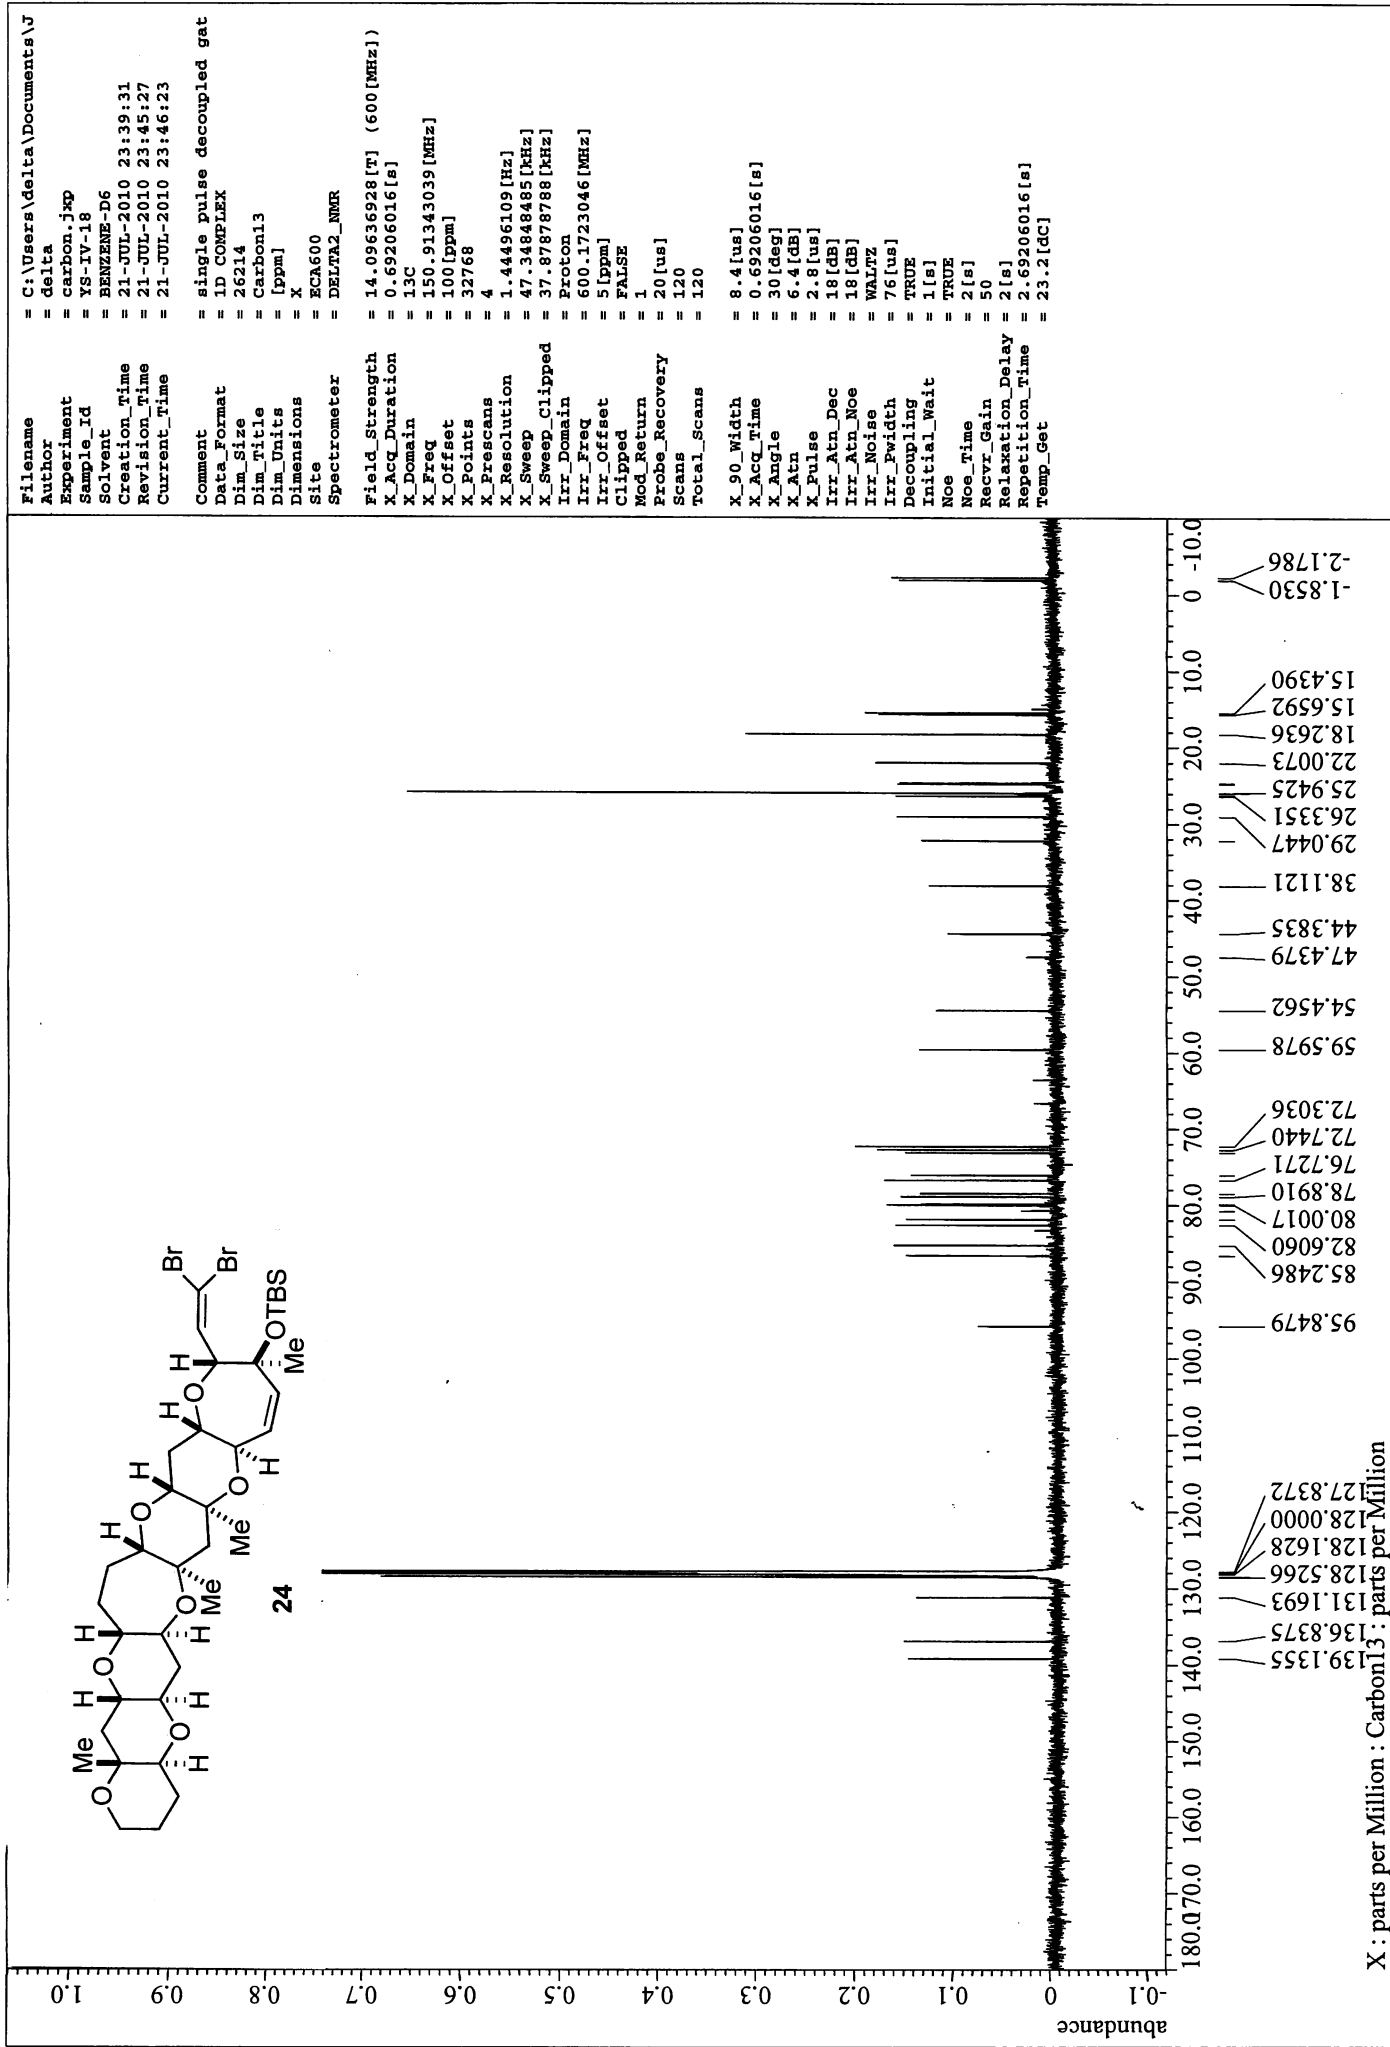

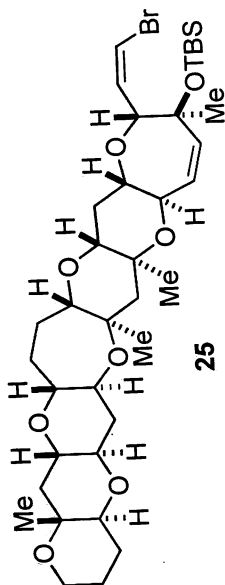

Filename = C:\Users\delta\Documents\J  
 Author = delta  
 Experiment = proton.jxp  
 Sample\_id = YS-IV-81  
 Solvent = BENZENE-D6  
 Creation\_Time = 14-SEP-2010 17:51:45  
 Revision\_Time = 14-SEP-2010 17:57:20  
 Current\_Time = 14-SEP-2010 17:57:45  
 Comment = single\_pulse  
 Data\_Format = 1D COMPLEX  
 Dim\_Size = 26214  
 Dim\_Title = Proton  
 Dim\_Units = [ppm]  
 Dimensions = X  
 Site = ECA600  
 Spectrometer = DELTA2\_NMR  
 Field\_Strength = 14.09636928[T] (600[MHz])  
 X\_Acq\_Duration = 2.9097984[s]  
 X\_Domain = 1H  
 X\_Freq = 600.1723046[MHz]  
 X\_Offset = 5[ppm]  
 X\_Points = 32768  
 X\_Prescans = 1  
 X\_Resolution = 0.34366642[Hz]  
 X\_Sweep = 11.26126126[kHz]  
 X\_Sweep\_Clippped = 9.00900901[kHz]  
 Irr\_Domain = Proton  
 Irr\_Freq = 600.1723046[MHz]  
 Irr\_Offset = 5[ppm]  
 Tri\_Domain = Proton  
 Tri\_Freq = 600.1723046[MHz]  
 Tri\_Offset = 5[ppm]  
 Clipped = FALSE  
 Mod\_Return = 1  
 Proba\_Recovery = 5[us]  
 Scans = 8  
 Total\_Scans = 8  
 X\_90\_Width = 12.4[us]  
 X\_Acq\_Time = 2.9097984[s]  
 X\_Angle = 45[deg]  
 X\_Atn = 3[dB]  
 X\_Pulse = 6.2[us]  
 Irr\_Mode = Off  
 Tri\_Mode = Off  
 Dante\_Preset = FALSE  
 Initial\_Wait = 1[s]  
 Recvr\_Gain = 30  
 Relaxation\_Delay = 1[s]  
 Repetition\_Time = 3.9097984[s]  
 Temp\_Get = 22.2[dC]

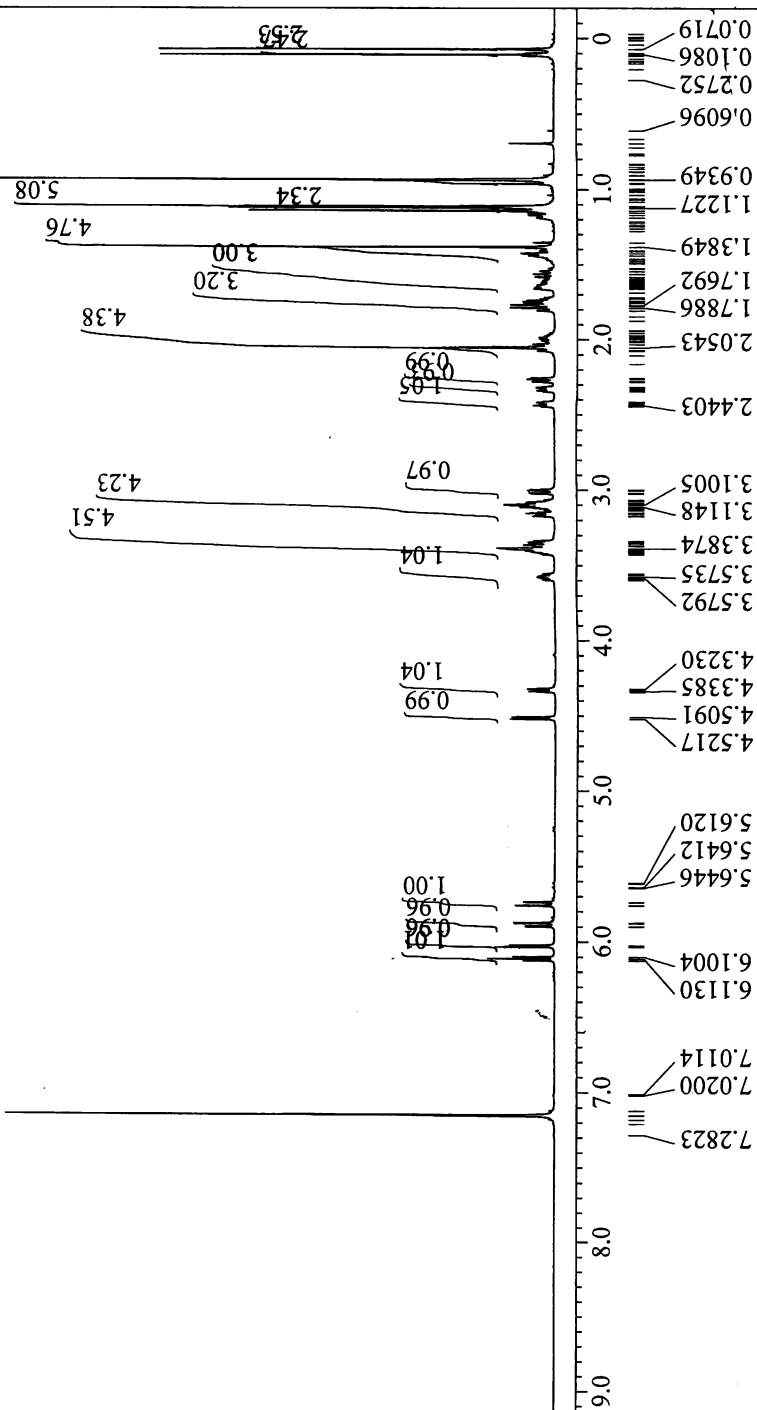

X : parts per Million : Proton : parts per Million

Filename = C:\Users\delta\Documents\J  
 Author = delta  
 Experiment = carbon.jxp  
 Sample\_Id = YS-IV-81  
 Solvent = BENZENE-D6  
 Creation\_Time = 14-SEP-2010 16:47:17  
 Revision\_Time = 14-SEP-2010 16:53:34  
 Current\_Time = 14-SEP-2010 16:57:18  
 Comment = single pulse decoupled gat  
 Data\_Format = 1D COMPLEX  
 Dim\_Size = 26214  
 Dim\_Title = Carbon13  
 Dim\_Units = [ppm]  
 Dimensions = X  
 Site = ECA600  
 Spectrometer = DELTA2\_NMR  
 Field\_Strength = 14.09636928[T] (600[MHz])  
 X\_Acq\_Duration = 0.69206016[s]  
 X\_Domain = 13C  
 X\_Freq = 150.91343039[MHz]  
 X\_Offset = 100[ppm]  
 X\_Points = 32768  
 X\_Prescans = 4  
 X\_Resolution = 1.44496109[Hz]  
 X\_Sweep = 47.34848485[MHz]  
 X\_Sweep\_Clipped = 37.87878788[MHz]  
 Irr\_Domain = Proton  
 Irr\_Freq = 600.1723046[MHz]  
 Irr\_Offset = 5[ppm]  
 Clipped = FALSE  
 Mod\_Return = 1  
 Probe\_Recovery = 20[us]  
 Scans = 102  
 Total\_Scans = 102  
 X\_90\_Width = 8.4[us]  
 X\_Acq\_Time = 0.69206016[s]  
 X\_Angle = 30[deg]  
 X\_Atn = 6.4[db]  
 X\_Pulse = 2.8[us]  
 Irr\_Atn\_Dec = 18[db]  
 Irr\_Atn\_No = 18[db]  
 Irr\_Noise = WALTZ  
 Irr\_Pwidth = 76[us]  
 Decoupling = TRUE  
 Initial\_Wait = 1[s]  
 Noe = TRUE  
 Noe\_Time = 2[s]  
 Recvr\_Gain = 50  
 Relaxation\_Delay = 2[s]  
 Repetition\_Time = 2.69206016[s]  
 Temp\_Get = 23.2[dc]

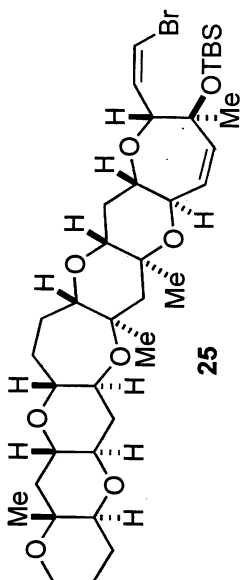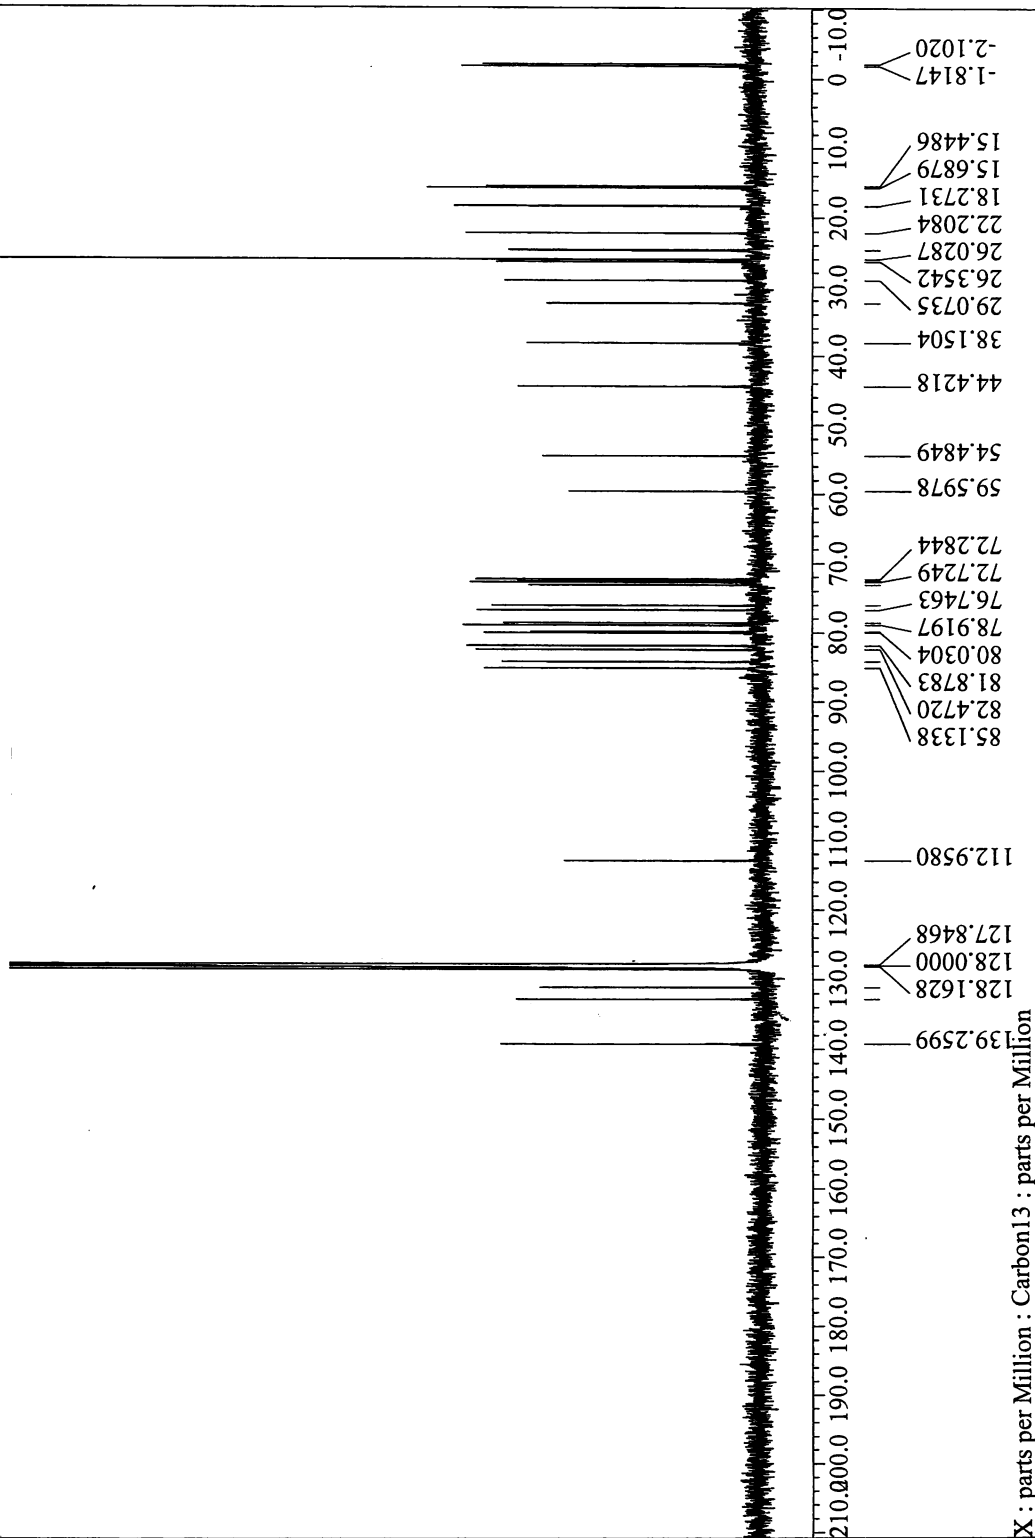

X : parts per Million : Carbon13 : parts per Million

Filename = C:\Users\delta\Documents\J  
 Author = delta  
 Experiment = proton.jpg  
 Sample\_Id = YS-IV-23  
 Solvent = CHLOROFORM-D  
 Creation\_Time = 30-JUL-2010 18:48:20  
 Revision\_Time = 30-JUL-2010 18:52:33  
 Current\_Time = 30-JUL-2010 18:53:00  
 Comment = single\_pulse  
 Data\_Format = 1D COMPLEX  
 Dim\_Size = 26214  
 Dim\_Title = Proton  
 Dim\_Units = [ppm]  
 Dimensions = X  
 Site = ECA600  
 Spectrometer = DELTA2\_NMR  
 Field\_Strength = 14.09636928[T] (600 [MHz])  
 X\_Acq\_Duration = 2.9097984[s]  
 X\_Domain = 1H  
 X\_Freq = 600.1723046 [MHz]  
 X\_Offset = 5 [ppm]  
 X\_Points = 32768  
 X\_Prescans = 1  
 X\_Resolution = 0.34366642 [Hz]  
 X\_Sweep = 11.26126126 [kHz]  
 X\_Sweep\_Clip = 9.00900901 [kHz]  
 X\_Sweep\_Domain = Proton  
 Irr\_Freq = 600.1723046 [MHz]  
 Irr\_Offset = 5 [ppm]  
 Tri\_Domain = Proton  
 Tri\_Freq = 600.1723046 [MHz]  
 Tri\_Offset = 5 [ppm]  
 Clipped = FALSE  
 Mod\_Return = 1  
 Probe\_Recovery = 5 [us]  
 Scans = 8  
 Total\_Scans = 8  
 X\_90\_Width = 12.4 [us]  
 X\_Acq\_Time = 2.9097984 [s]  
 X\_Angle = 45 [deg]  
 X\_Atn = 3 [dB]  
 X\_Pulse = 6.2 [us]  
 Irr\_Mode = Off  
 Tri\_Mode = Off  
 Danta\_Presat = FALSE  
 Initial\_Wait = 1 [s]  
 Recvr\_Gain = 50  
 Relaxation\_Delay = 1 [s]  
 Repetition\_Time = 3.9097984 [s]  
 Temp\_Get = 22.6 [dc]

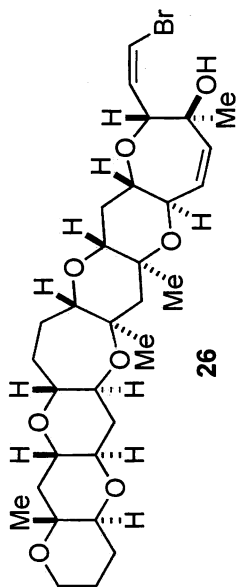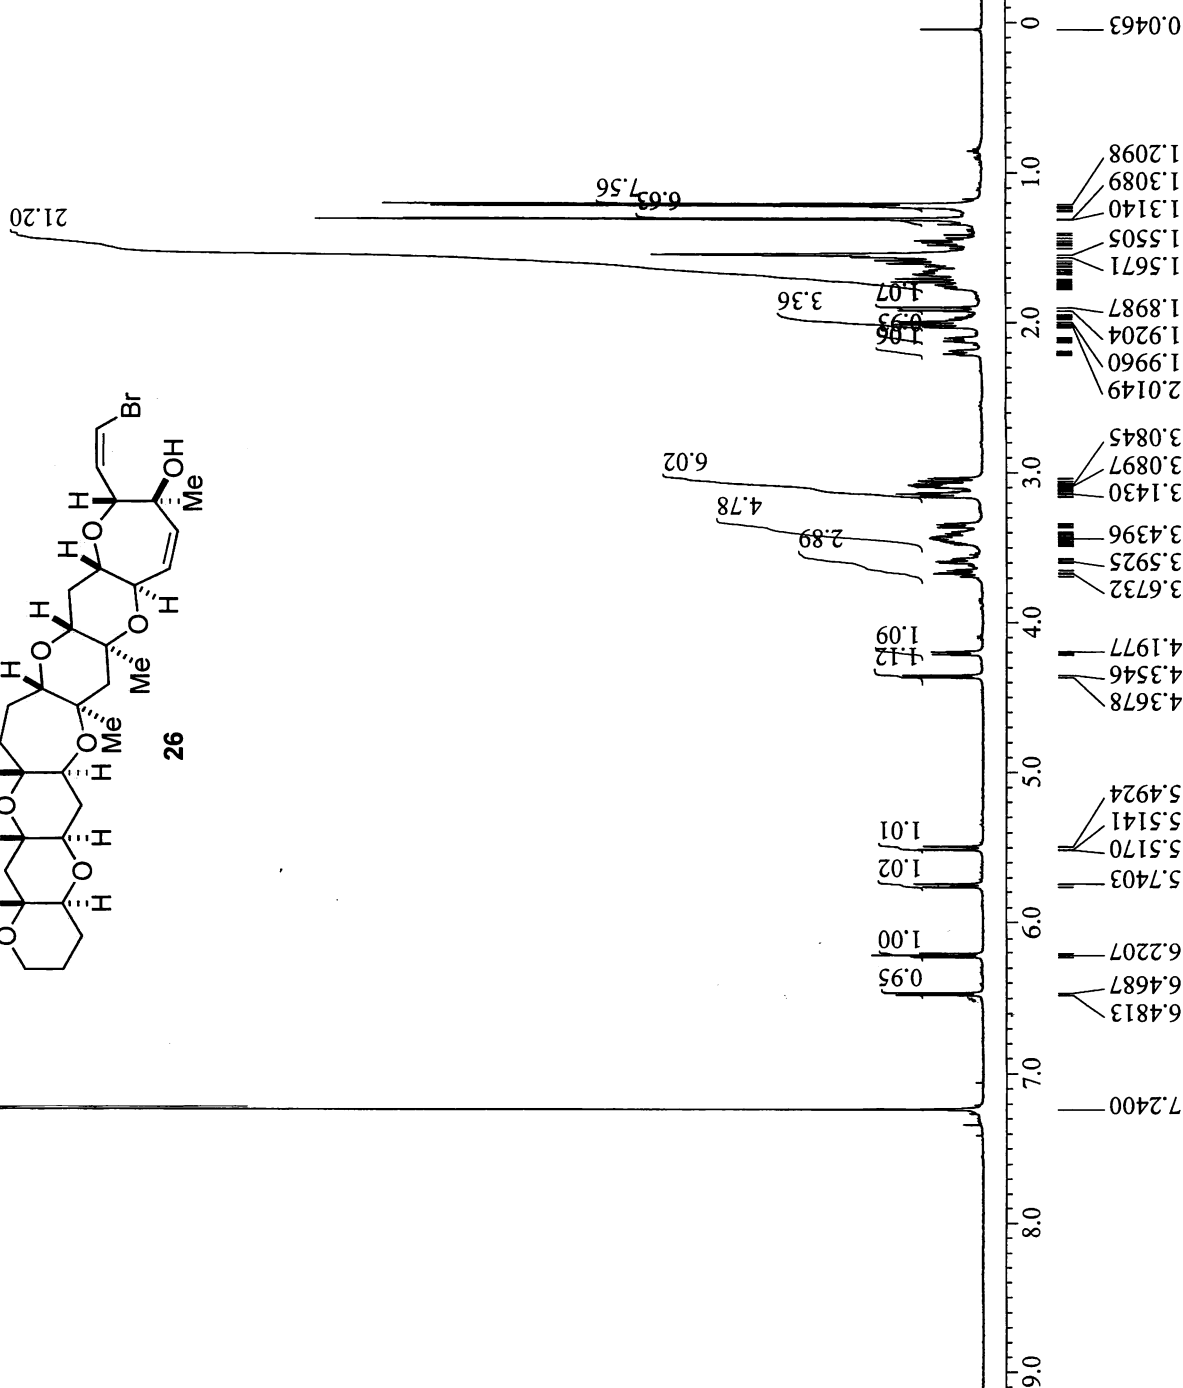

X : parts per Million : Proton : parts per Million

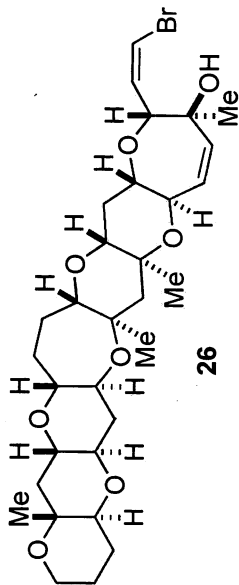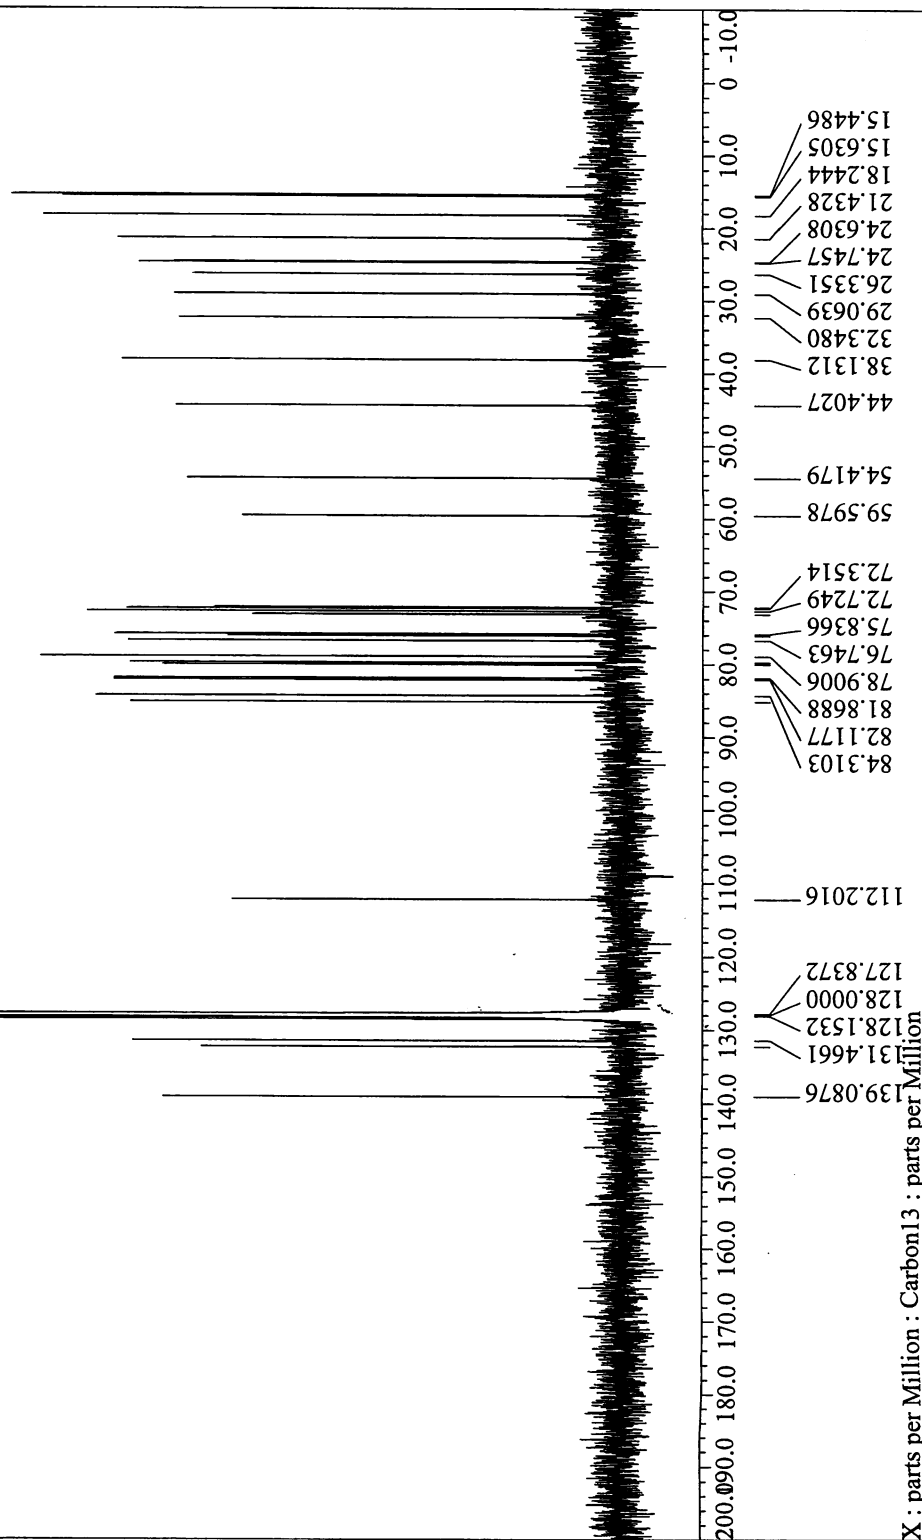

Filename = C:\Users\delta\Documents\J  
 Author = delta  
 Experiment = carbon.jpg  
 Sample\_Id = YS-IV-82  
 Solvent = BENZENE-D6  
 Creation\_Time = 21-SEP-2010 20:21:33  
 Revision\_Time = 21-SEP-2010 20:27:31  
 Current\_Time = 21-SEP-2010 20:28:49  
 Comment = single pulse decoupled gat  
 Data\_Format = 1D COMPLEX  
 Dim\_Size = 26214  
 Dim\_Title = Carbon13  
 Dim\_Units = [ppm]  
 Dimensions = X  
 Site = ECA600  
 Spectrometer = DELTA2\_NMR  
 Field\_Strength = 14.09636928[T] (600[MHz])  
 X\_Acq\_Duration = 0.69206016[s]  
 X\_Domain = 13C  
 X\_Freq = 150.91343039[MHz]  
 X\_Offset = 100[ppm]  
 X\_Points = 32768  
 X\_Prescans = 4  
 X\_Resolution = 1.44496109[Hz]  
 X\_Sweep = 47.34848485[kHz]  
 X\_Sweep\_Clipped = 37.87878788[kHz]  
 Irr\_Domain = Proton  
 Irr\_Freq = 600.1723046[MHz]  
 Irr\_Offset = 5[ppm]  
 Clipped = FALSE  
 Mod\_Return = 1  
 Probe\_Recovery = 20[us]  
 Scans = 106  
 Total\_Scans = 106  
 X\_90\_Width = 8.4[us]  
 X\_Acq\_Time = 0.69206016[s]  
 X\_Angle = 30[deg]  
 X\_Atn = 6.4[db]  
 X\_Pulse = 2.8[us]  
 Irr\_Atn\_Dec = 18[db]  
 Irr\_Atn\_Noe = 18[db]  
 Irr\_Noise = WALTZ  
 Irr\_Fwidth = 76[us]  
 Decoupling = TRUE  
 Initial\_Wait = 1[s]  
 Noe = TRUE  
 Noe\_Time = 2[s]  
 Recvr\_Gain = 50  
 Relaxation\_Delay = 2[s]  
 Repetition\_Time = 2.69206016[s]  
 Temp\_Get = 23.1[dc]

X : parts per Million : Carbon13 : parts per Million



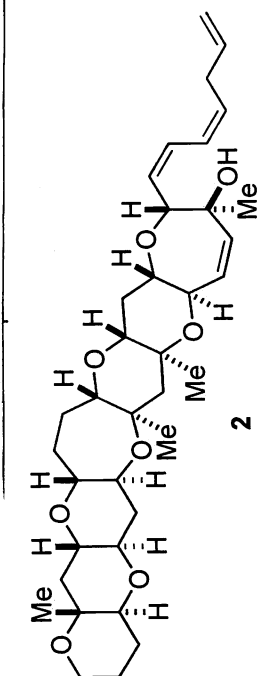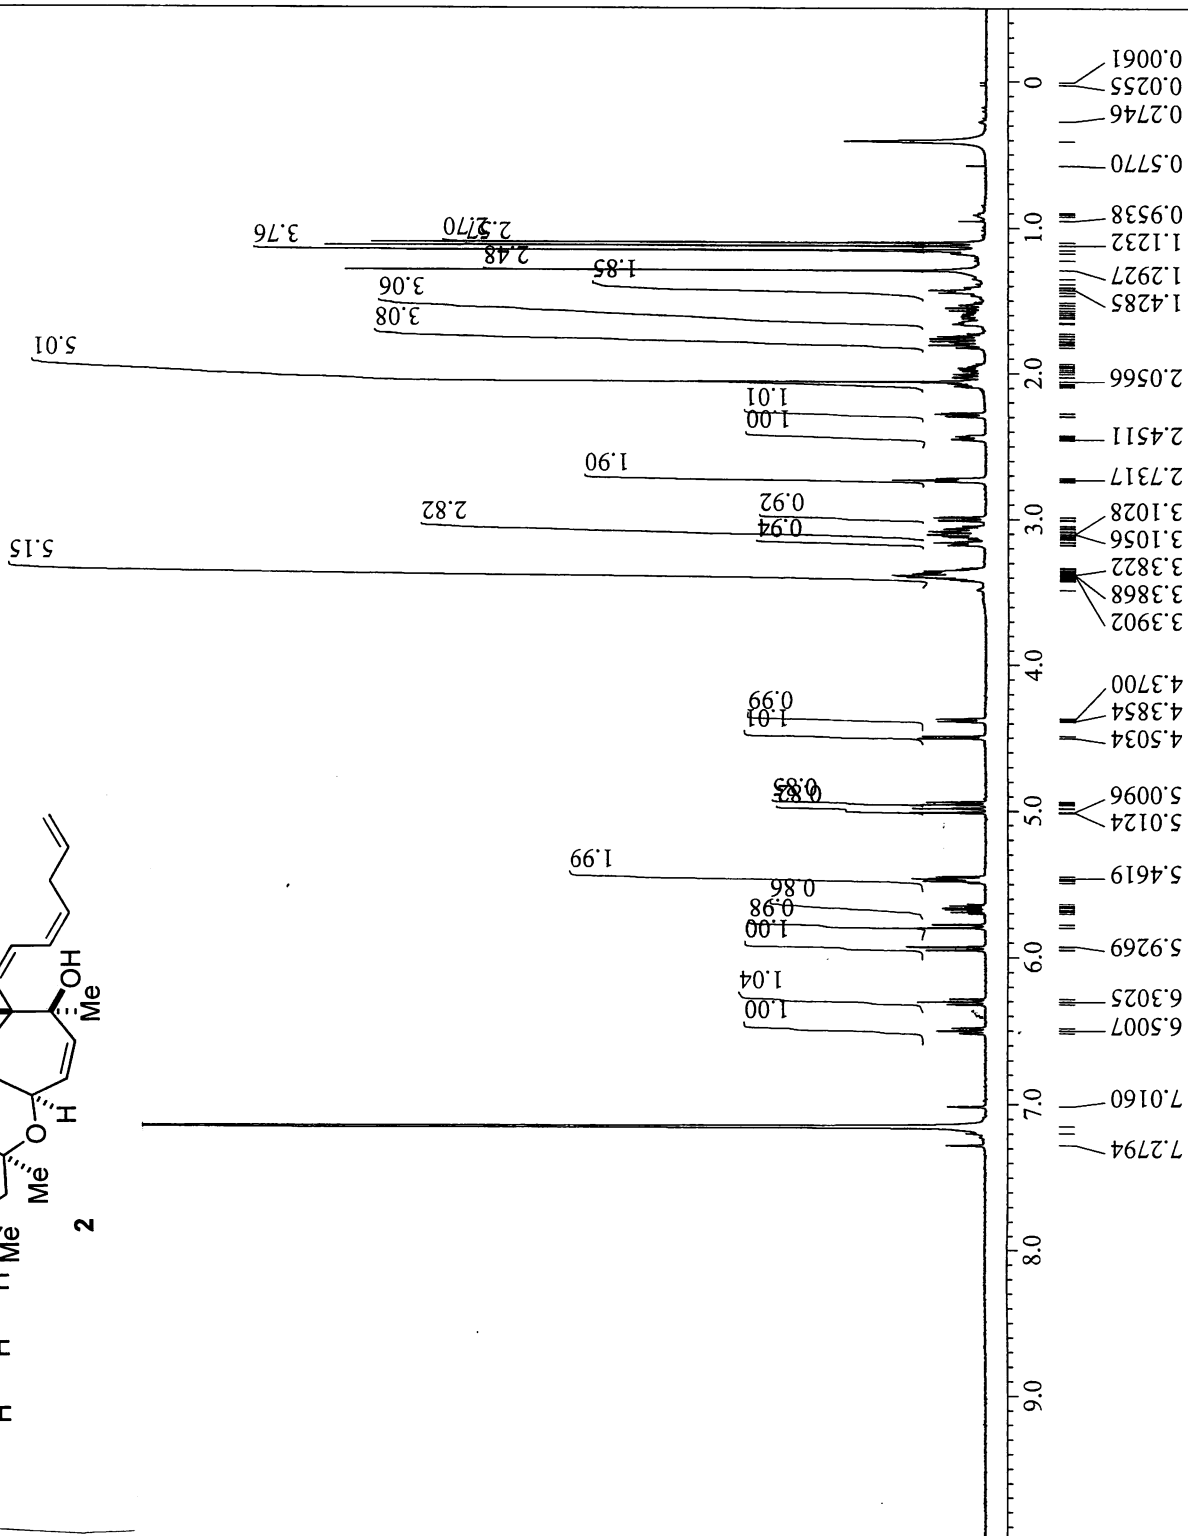

X : parts per Million : Proton : parts per Million

Filename = C:\Users\delta\Documents\jv  
 Author = delta  
 Experiment = proton.jpg  
 Sample\_Id = YS-IV-137  
 Solvent = BENZENE-D6  
 Creation\_Time = 7-FEB-2011 23:08:47  
 Revision\_Time = 7-FEB-2011 23:12:56  
 Current\_Time = 7-FEB-2011 23:13:24  
 Comment = single\_pulse  
 Data\_Format = 1D\_COMPLEX  
 Dim\_Size = 26214  
 Dim\_Title = Proton  
 Dim\_Units = [ppm]  
 Dimensions = X  
 Site = ECA600  
 Spectrometer = DELTA2\_NMR  
 Field\_Strength = 14.0963928[T] (600[MHz])  
 X\_Acq\_Duration = 2.9097984[s]  
 X\_Domain = 1H  
 X\_Freq = 600.1723046[MHz]  
 X\_Offset = 5[ppm]  
 X\_Points = 32768  
 X\_Prescans = 1  
 X\_Resolution = 0.34366642[Hz]  
 X\_Sweep = 11.26126126[kHz]  
 X\_Sweep\_Clippped = 9.00900901[kHz]  
 Irr\_Domain = Proton  
 Irr\_Freq = 600.1723046[MHz]  
 Irr\_Offset = 5[ppm]  
 Tri\_Domain = Proton  
 Tri\_Freq = 600.1723046[MHz]  
 Tri\_Offset = 5[ppm]  
 Clipped = FALSE  
 Scans = 8  
 Total\_Scans = 8  
 Relaxation\_Delay = 1[s]  
 Recvr\_Gain = 50  
 Temp\_Get = 22.3[dC]  
 X\_90\_Width = 13.3[us]  
 X\_Acq\_Time = 2.9097984[s]  
 X\_Angle = 45[deg]  
 X\_Atn = 3[dB]  
 X\_Pulse = 6.65[us]  
 Irr\_Mode = Off  
 Tri\_Mode = Off  
 Dante\_Presat = FALSE  
 Initial\_Wait = 1[s]  
 Repetition\_Time = 3.9097984[s]

Filename = C:\Users\delta\Desktop\dat  
 Author = delta  
 Experiment = carbon.jxp  
 Sample\_Id = YS-GBR-7analog  
 Solvent = BENZENE-D6  
 Creation\_Time = 27-FEB-2011 17:11:18  
 Revision\_Time = 6-JAN-2012 02:44:50  
 Current\_Time = 6-JAN-2012 02:44:54  
 Comment = single pulse decoupled gat  
 Data\_Format = 1D COMPLEX  
 Dim\_Size = 26214  
 Dim\_Title = Carbon13  
 Dim\_Units = [ppm]  
 Dimensions = X  
 Site = ECA600  
 Spectrometer = DELTA2\_NMR  
 Field\_Strength = 14.09636928[T] (600[MHz])  
 X\_Acq\_Duration = 0.69206016[s]  
 X\_Domain = 13C  
 X\_Freq = 150.91343039[MHz]  
 X\_Offset = 100[ppm]  
 X\_Points = 32768  
 X\_Prescans = 4  
 X\_Resolution = 1.44496109[Hz]  
 X\_Sweep = 47.34848485[kHz]  
 X\_Sweep\_Clipped = 37.87878788[kHz]  
 Irr\_Domain = Proton  
 Irr\_Freq = 600.1723046[MHz]  
 Irr\_Offset = 5[ppm]  
 Clipped = TRUE  
 Scans = 1889  
 Total\_Scans = 1889  
 Relaxation\_Delay = 2[s]  
 Recvr\_Gain = 50  
 Temp\_Get = 21.7[deg]  
 X\_90\_Width = 8.8[us]  
 X\_Acq\_Time = 0.69206016[s]  
 X\_Angle = 30[deg]  
 X\_Atn = 6.4[deg]  
 X\_Pulse = 2.93333333[us]  
 Irr\_Atn\_Dec = 18[deg]  
 Irr\_Atn\_Noe = 18[deg]  
 Irr\_Noise = WALTZ  
 Irr\_Pwidth = 76[us]  
 Decoupling = TRUE  
 Initial\_Wait = 1[s]  
 Noe = TRUE  
 Noe\_Time = 2[s]  
 Repetition\_Time = 2.69206016[s]

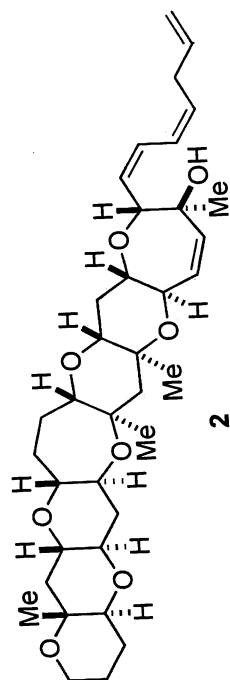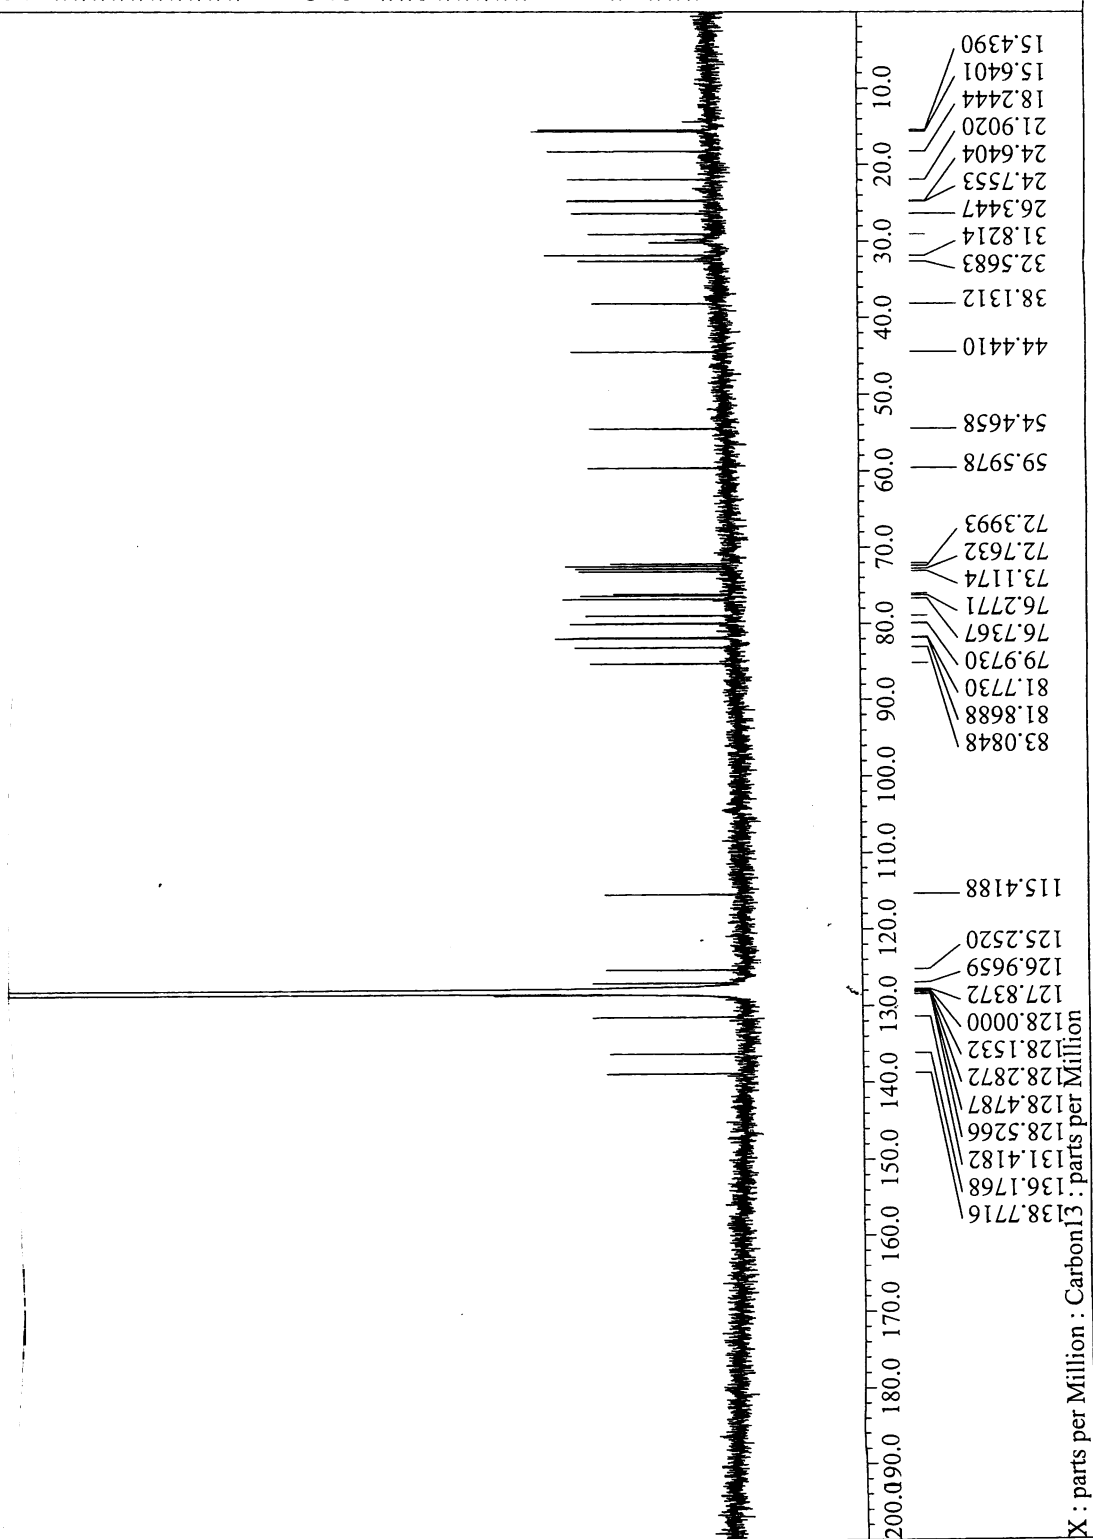

X : parts per Million : Carbon13 : parts per Million

exp1 s2pu1

SAMPLE DEC. & VT  
 date Nov 5 2005 dfrq 499.862  
 solvent Benzene dn H1  
 file exp 30  
 ACQUISITION  
 sfrq 499.862 dm nnn  
 tn 1.892 dmn c  
 at 80272 dmf 200  
 np 8000.0 dseq 1.0  
 sw not used dres n  
 fb not used homo 20.0  
 bs 4 temp  
 tpwr 54  
 pw 2.5 wfile  
 d1 1.000 proc lp  
 tof 140.0 fn not used  
 nt 16 math f  
 ct 16  
 alock n werr wft  
 gain not used wexp wft  
 FLAGS  
 il n  
 in n  
 dp y  
 hs nn  
 DISPLAY  
 sp 250.0  
 wp 4248.8  
 vs 311  
 sc 0  
 wc 250  
 hzmm 17.00  
 is 83.57  
 rfl 5203.9  
 rfp 3574.0  
 th 1.000  
 ins  
 nm ph

29

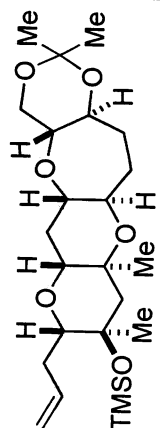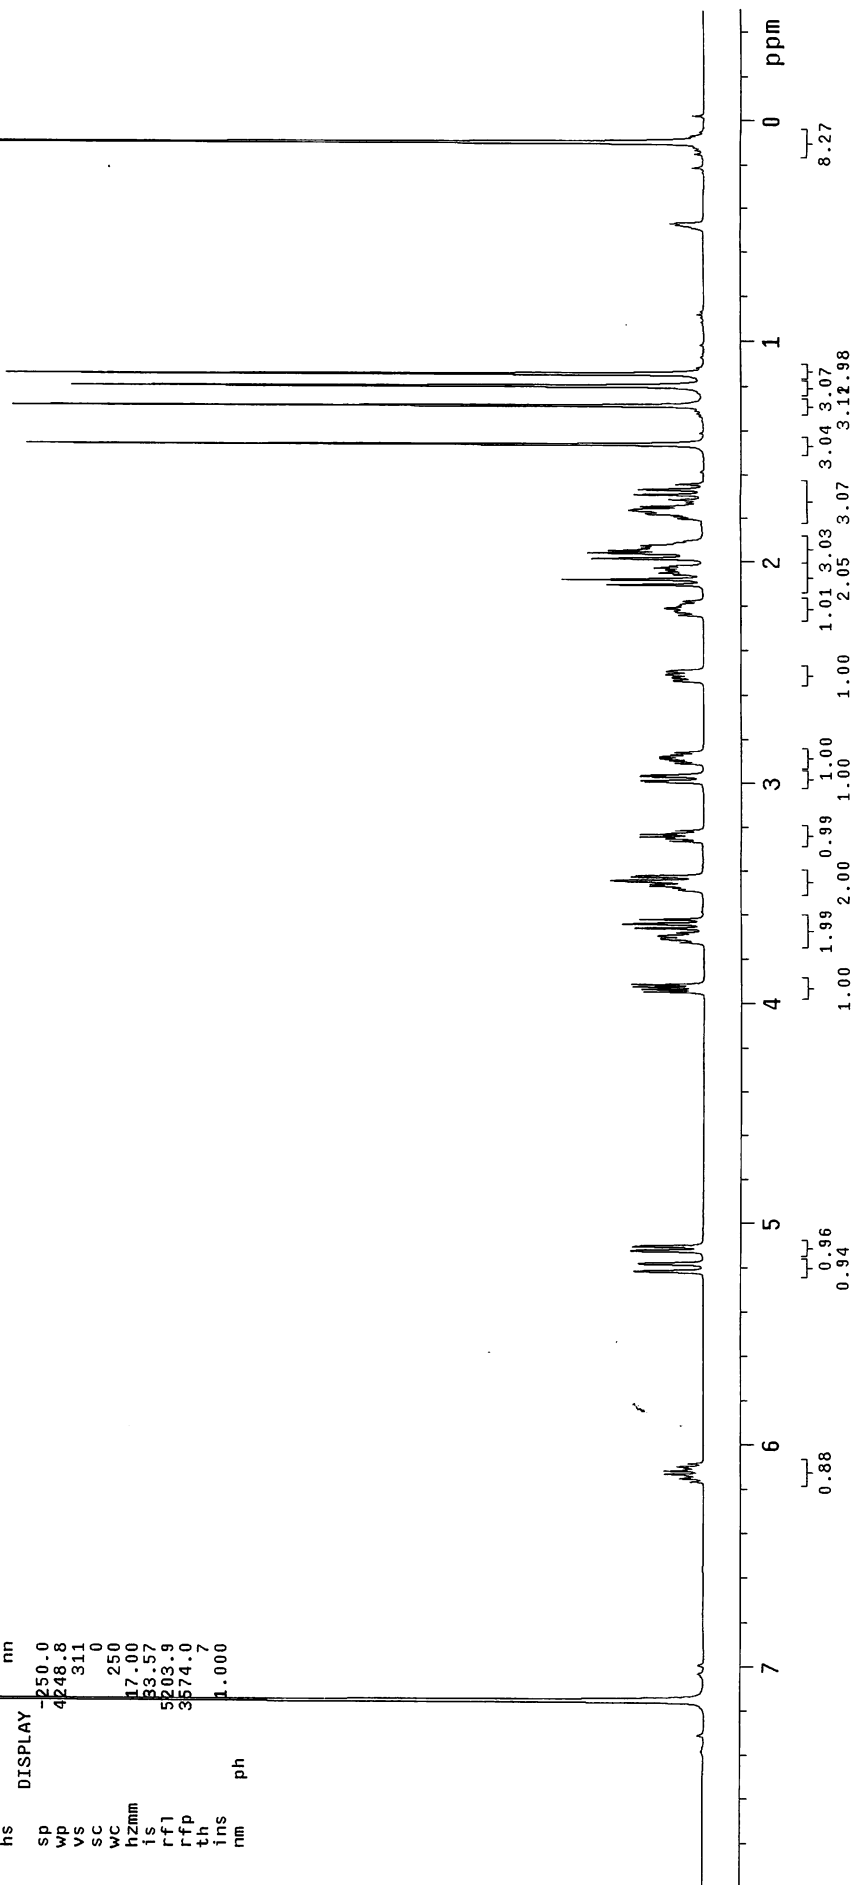

exp3 s2pu1

| SAMPLE      |            | DEC. & VT  |         |
|-------------|------------|------------|---------|
| date        | Nov 5 2005 | dfrq       | 499.862 |
| solvent     | Benzene    | dn         | H1      |
| file        | exp        | dpwr       | 27      |
|             |            | dof        | 0       |
| ACQUISITION |            | dm         | vvv     |
| sfrq        | 125.714    | dmm        | w       |
| tn          | C13        | dmm        | 12579   |
| at          | 1.238      | dmf        |         |
| np          | 979.4      | dseq       |         |
| sw          | 37735.8    | dres       | 1.0     |
| not used    |            | homo       | n       |
| bs          | 32         | temp       | 20.0    |
| ttwpr       | 6.1        | PROCESSING |         |
| pw          | 513        | lb         | 0.50    |
| d1          | 0.710      | wfile      |         |
| tof         | 1883.8     | proc       | ft      |
| nt          | 5110       | fn         | 131072  |
| ct          | 244        | math       | f       |
| atock       | n          |            |         |
| gain        | 36         | werr       | wft     |
| FLAGS       |            | wexp       |         |
| il          | n          | wbs        |         |
| in          | n          | wn         |         |
|             | wn         |            |         |

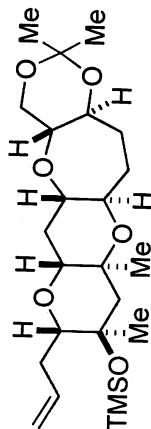

29

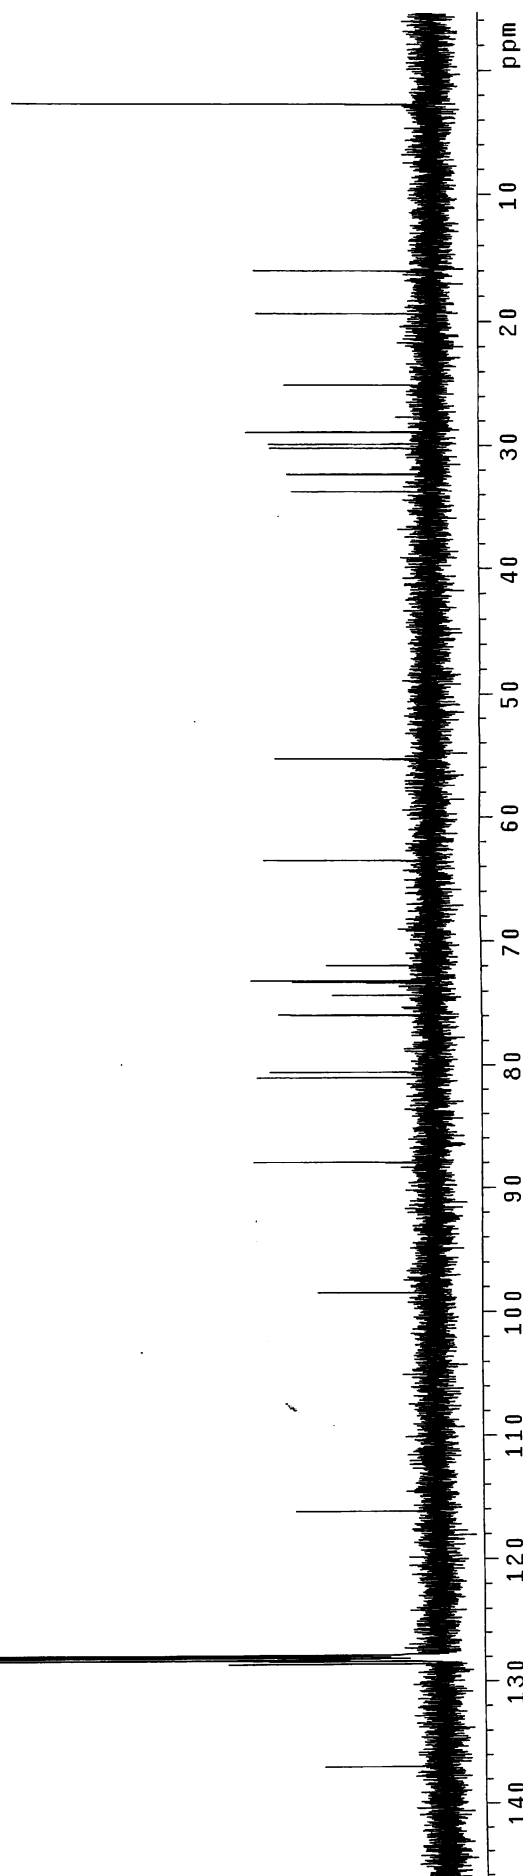



C13 STD parameter

```

exp3 s2pul

SAMPLE
date Nov 7 2005
solvent Benzene
file exp
ACQUISITION
sfrq 150.865
tn C13
at 0.867
np 60032
sw 34632.0
fb not used
bs 64
tpwr 56
pw 6.8
d1 0.689
tof 3000.0
nt 50000
ct 128
a1ock n
gain 56
FLAGS
il n
in n
dp n
hs Y
DISPLAY
sp -816.6
wp 34632.0
vs 606
sc 0
wc 250
hznmm 138.53
is 500.00
rfl 816.6
th 0
ins 13
nm cdc ph 100.000
DEC. & VT
dfrq 599.915
dn H1
dpwr 38
dof -1000.0
dm YVY
dmm 13163
dmf W
dseq 1.0
dres n
dres2 20.0
dtemp DEC2
dfrq2 0
dn2 0
dpwr2 1
dof2 0
dm2 n
dmm2 C
dmf2 10000
dseq2 1.0
dres2 n
dres3 0
dn3 1
dpwr3 0
dof3 n
dm3 C
dmm3 12346
dmf3 1.0
dres3 n
homo3 PROCESSING
lb 0.50
wtfile ft
proc fn
fn 131072
math f
werr wft
wexp wbs
wnt wnt
  
```

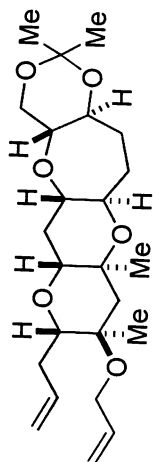

30

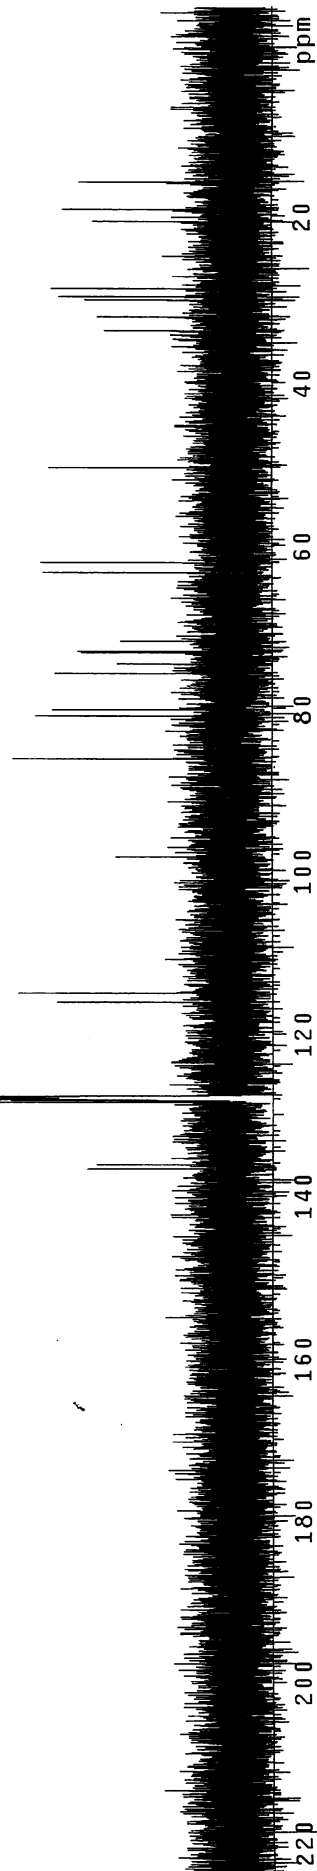

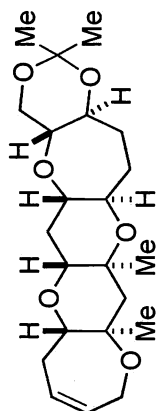

31

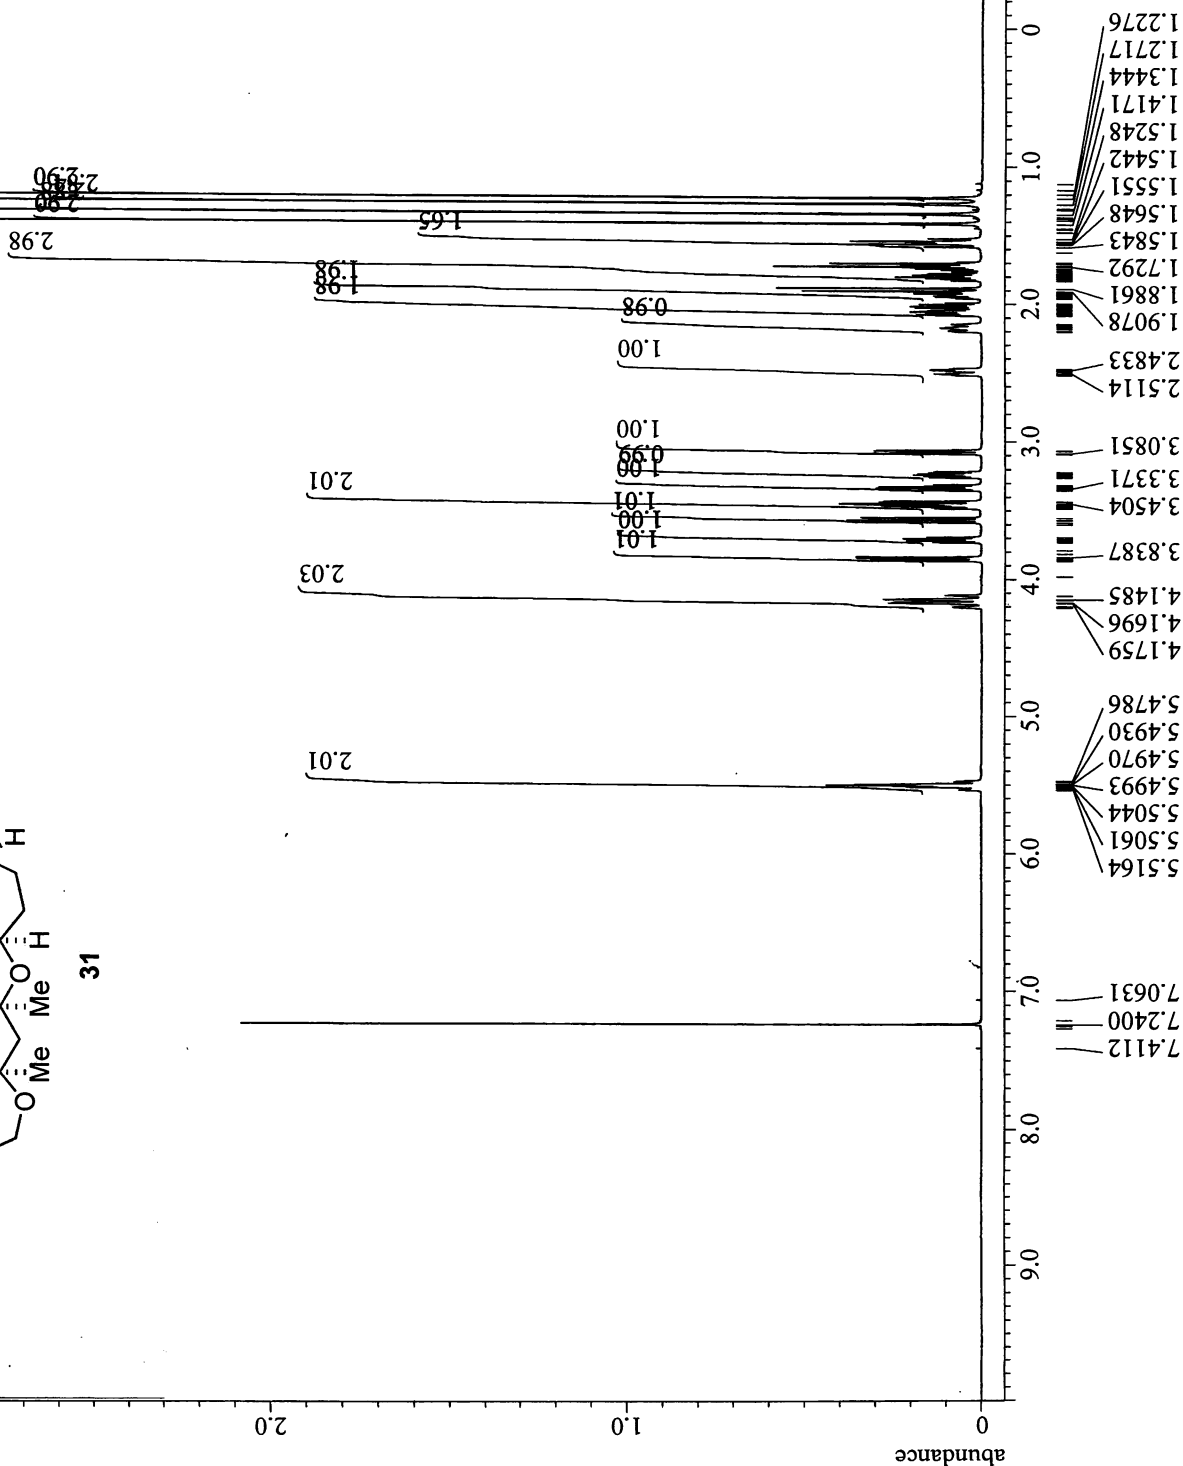

X : parts per Million : Proton : parts per Million

Filename = C:\Users\delta\Documents\J  
 Author = delta  
 Experiment = proton.jxp  
 Sample\_id = HF18105  
 Solvent = CHLOROFORM-D  
 Creation\_Time = 24-MAY-2011 16:04:33  
 Revision\_Time = 24-MAY-2011 16:06:14  
 Current\_Time = 24-MAY-2011 16:06:29  
 Comment = single\_pulse  
 Data\_Format = 1D COMPLEX  
 Dim\_Size = 26214  
 Dim\_Title = Proton  
 Dim\_Units = [ppm]  
 Dimensions = X  
 Site = ECA600  
 Spectrometer = DELTA2\_NMR  
 Field\_Strength = 14.09636928[T] (600[MHz])  
 X\_Acq\_Duration = 2.9097984[s]  
 X\_Domain = 1H  
 X\_Freq = 600.1723046[MHz]  
 X\_Offset = 5[ppm]  
 X\_Points = 32768  
 X\_Prescans = 1  
 X\_Resolution = 0.34366642[Hz]  
 X\_Sweep = 11.26126126[kHz]  
 X\_Sweep\_Clip = 9.00900901[kHz]  
 Irr\_Domain = Proton  
 Irr\_Freq = 600.1723046[MHz]  
 Irr\_Offset = 5[ppm]  
 Tri\_Domain = Proton  
 Tri\_Freq = 600.1723046[MHz]  
 Tri\_Offset = 5[ppm]  
 Clipped = FALSE  
 Scans = 8  
 Total\_Scans = 8  
 Relaxation\_Delay = 1[s]  
 Recvr\_Gain = 46  
 Temp\_Get = 21.5[deg]  
 X\_90\_Width = 13.3[us]  
 X\_Acq\_Time = 2.9097984[s]  
 X\_Angle = 45[deg]  
 X\_Atn = 3[db]  
 X\_Pulse = 6.65[us]  
 Irr\_Mode = Off  
 Tri\_Mode = Off  
 Dante\_Preset = FALSE  
 Initial\_Wait = 1[s]  
 Repetition\_Time = 3.9097984[s]

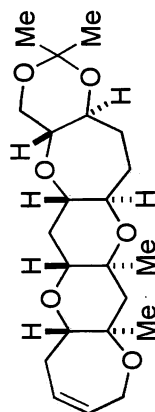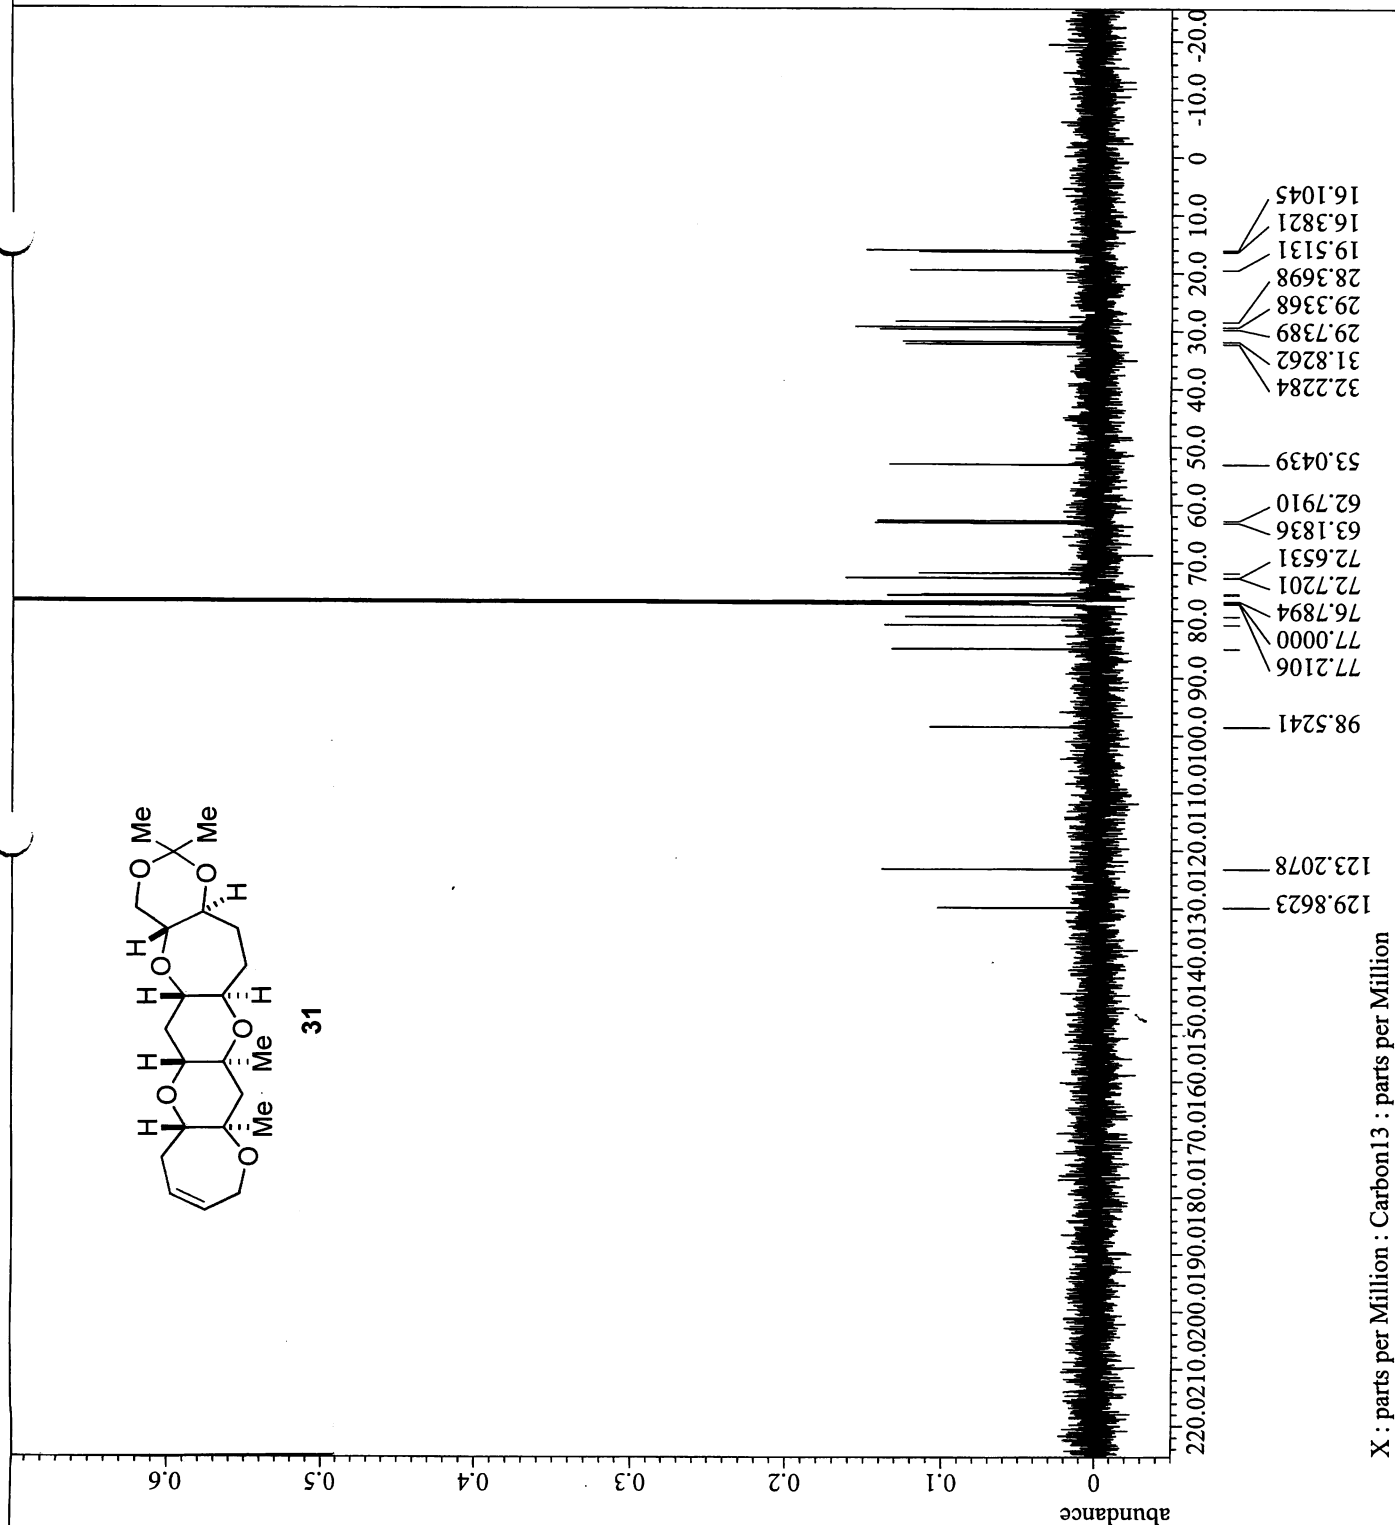



HF18107/CDC13

exp1 s2pul

|             |             |           |          |
|-------------|-------------|-----------|----------|
| SAMPLE      |             | DEC. & VT |          |
| date        | Nov 10 2005 | dfrq      | 499.862  |
| solvent     | CDC13       | dn        | H1       |
| file        | exp         | dpwr      | 30       |
| ACQUISITION |             | dof       | 0        |
| sfrq        | 499.862     | dm        | nnn      |
| tn          | H1          | dmm       | C        |
| at          | 1.892       | dmf       | 2.00     |
| np          | 30272       | dseq      |          |
| sw          | 8000.0      | dres      | 1.0      |
| fb          | not used    | homo      | n        |
| bs          | 4           | temp      | 20.0     |
| PROCESSING  |             |           |          |
| tpwr        | 54          | wfile     |          |
| pw          | 2.5         | proc      | lp       |
| d1          | 1.000       | fn        | not used |
| tof         | -140.0      | math      | f        |
| nt          | 16          | werr      |          |
| ct          | 16          | wexp      | wft      |
| alock       | n           | wbs       |          |
| gain        | not used    | wnt       | wft      |
| il          | n           |           |          |
| in          | n           |           |          |
| dp          | y           |           |          |
| hs          | nn          |           |          |
| DISPLAY     |             |           |          |
| sp          | -250.4      |           |          |
| wp          | 4248.8      |           |          |
| vs          | 176         |           |          |
| sc          | 0           |           |          |
| wc          | 250         |           |          |
| hzmm        | 17.00       |           |          |
| is          | 33.57       |           |          |
| rfl         | 5277.2      |           |          |
| rflp        | 3619.0      |           |          |
| th          | 7           |           |          |
| ins         | 1.000       |           |          |
| nm          |             |           |          |
| ph          |             |           |          |

32

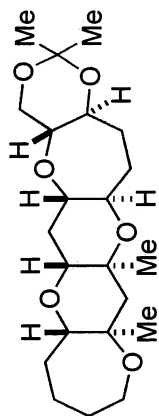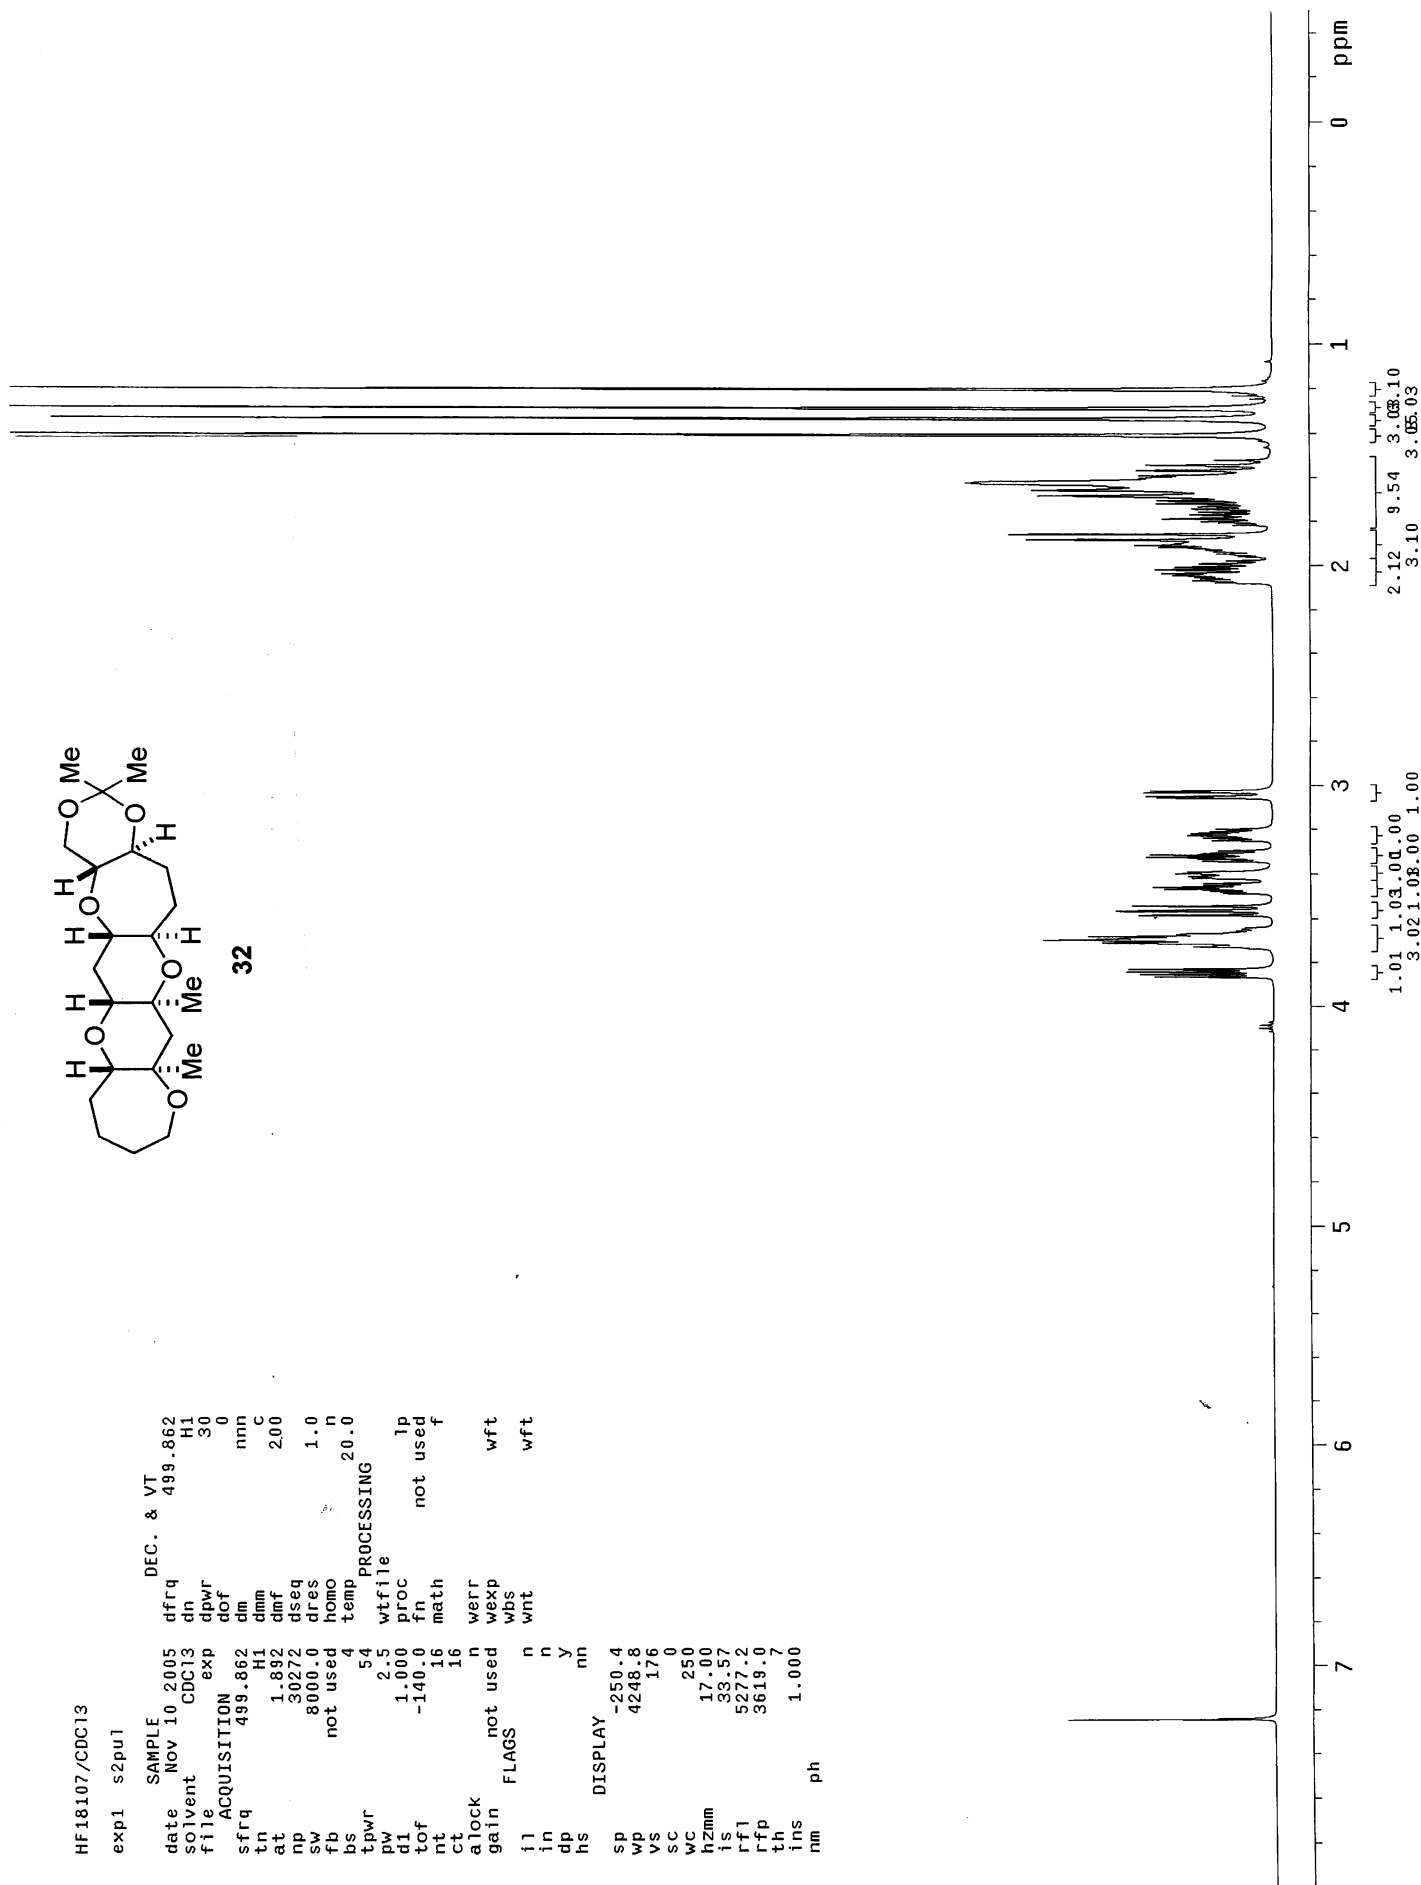

## STANDARD CARBON PARAMETERS

exp3 s2pul

SAMPLE  
 date Nov 10 2005 dfrq DEC. & VT  
 solvent CDC13 dn H1  
 file ACQUISITION exp 27  
 sfrq 125.704 dm 0  
 tn 1.298 dmf w  
 at 97994 dseq 12579  
 np 37735.8 dres 1.0  
 sw not used homo n  
 bs 32 temp 20.0  
 tpwr 61 PROCESSING  
 pw 5.3 lb 0.50  
 d1 0.700 wfile  
 nt 1883.8 proc ft  
 ct 5120 fn 131072 f  
 math  
 alock n  
 gain 56 werr  
 il n wexp  
 in n wbs  
 dp y wnt  
 hs nn  
 DISPLAY  
 sp 1089.3  
 wp 12680.5  
 vs 40  
 sc 0  
 wc 250  
 h2mm 50.72  
 is 500.00  
 rfl 14754.0  
 rfp 9678.1  
 th 100.000  
 nm ph

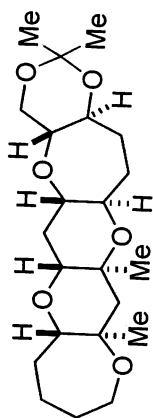

32

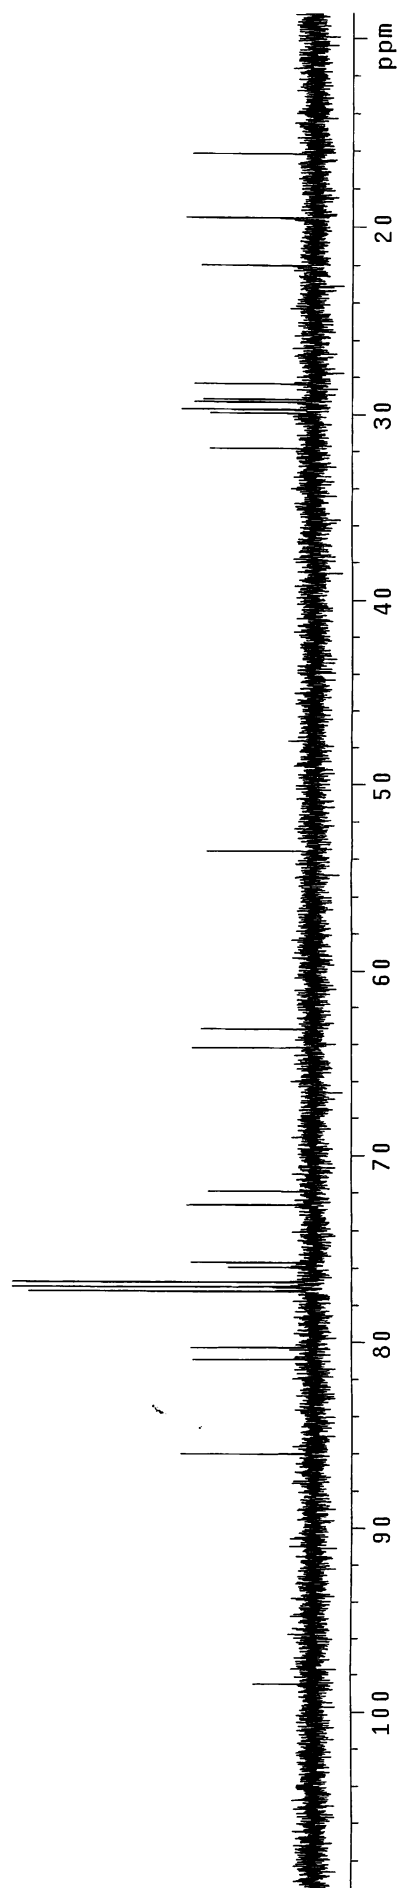

HF18110/C606

exp1 s2pul

|             |             |            |          |
|-------------|-------------|------------|----------|
| SAMPLE      |             | DEC. & VT  |          |
| date        | Nov 12 2005 | dfrq       | 499.862  |
| solvent     | Benzene     | dn         | H1       |
| file        | exp         | dpwr       | 30       |
| ACQUISITION |             | dof        | 0        |
| sfrq        | 499.862     | dm         | nnn      |
| tn          | H1          | dmn        | c        |
| at          | 1.892       | dseq       | 200      |
| np          | 30272       | dof        | 1.0      |
| sw          | 8000.0      | homo       | n        |
| fb          | not used    | temp       | 20.0     |
| bs          | 4           | PROCESSING |          |
| tpwr        | 54          | wtfile     |          |
| pw          | 2.5         | proc       | lp       |
| d1          | 1.000       | fn         | not used |
| tof         | -140.0      | math       | f        |
| nt          | 16          | werr       | wft      |
| ct          | 16          | wexp       | wft      |
| alock       | not used    | wbs        |          |
| gain        | nn          | wnt        |          |
| il          | n           |            |          |
| in          | n           |            |          |
| dp          | y           |            |          |
| hs          | nn          |            |          |
| DISPLAY     |             |            |          |
| sp          | -250.0      |            |          |
| wp          | 4248.8      |            |          |
| vs          | 324         |            |          |
| sc          | 0           |            |          |
| wc          | 250         |            |          |
| hzmm        | 17.00       |            |          |
| is          | 83.57       |            |          |
| rfl         | 5205.4      |            |          |
| rffp        | 3574.0      |            |          |
| th          | 1.000       |            |          |
| ins         |             |            |          |
| nm          |             |            |          |

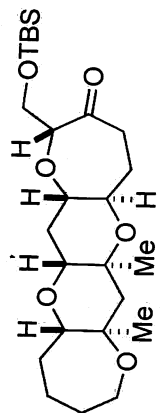

33

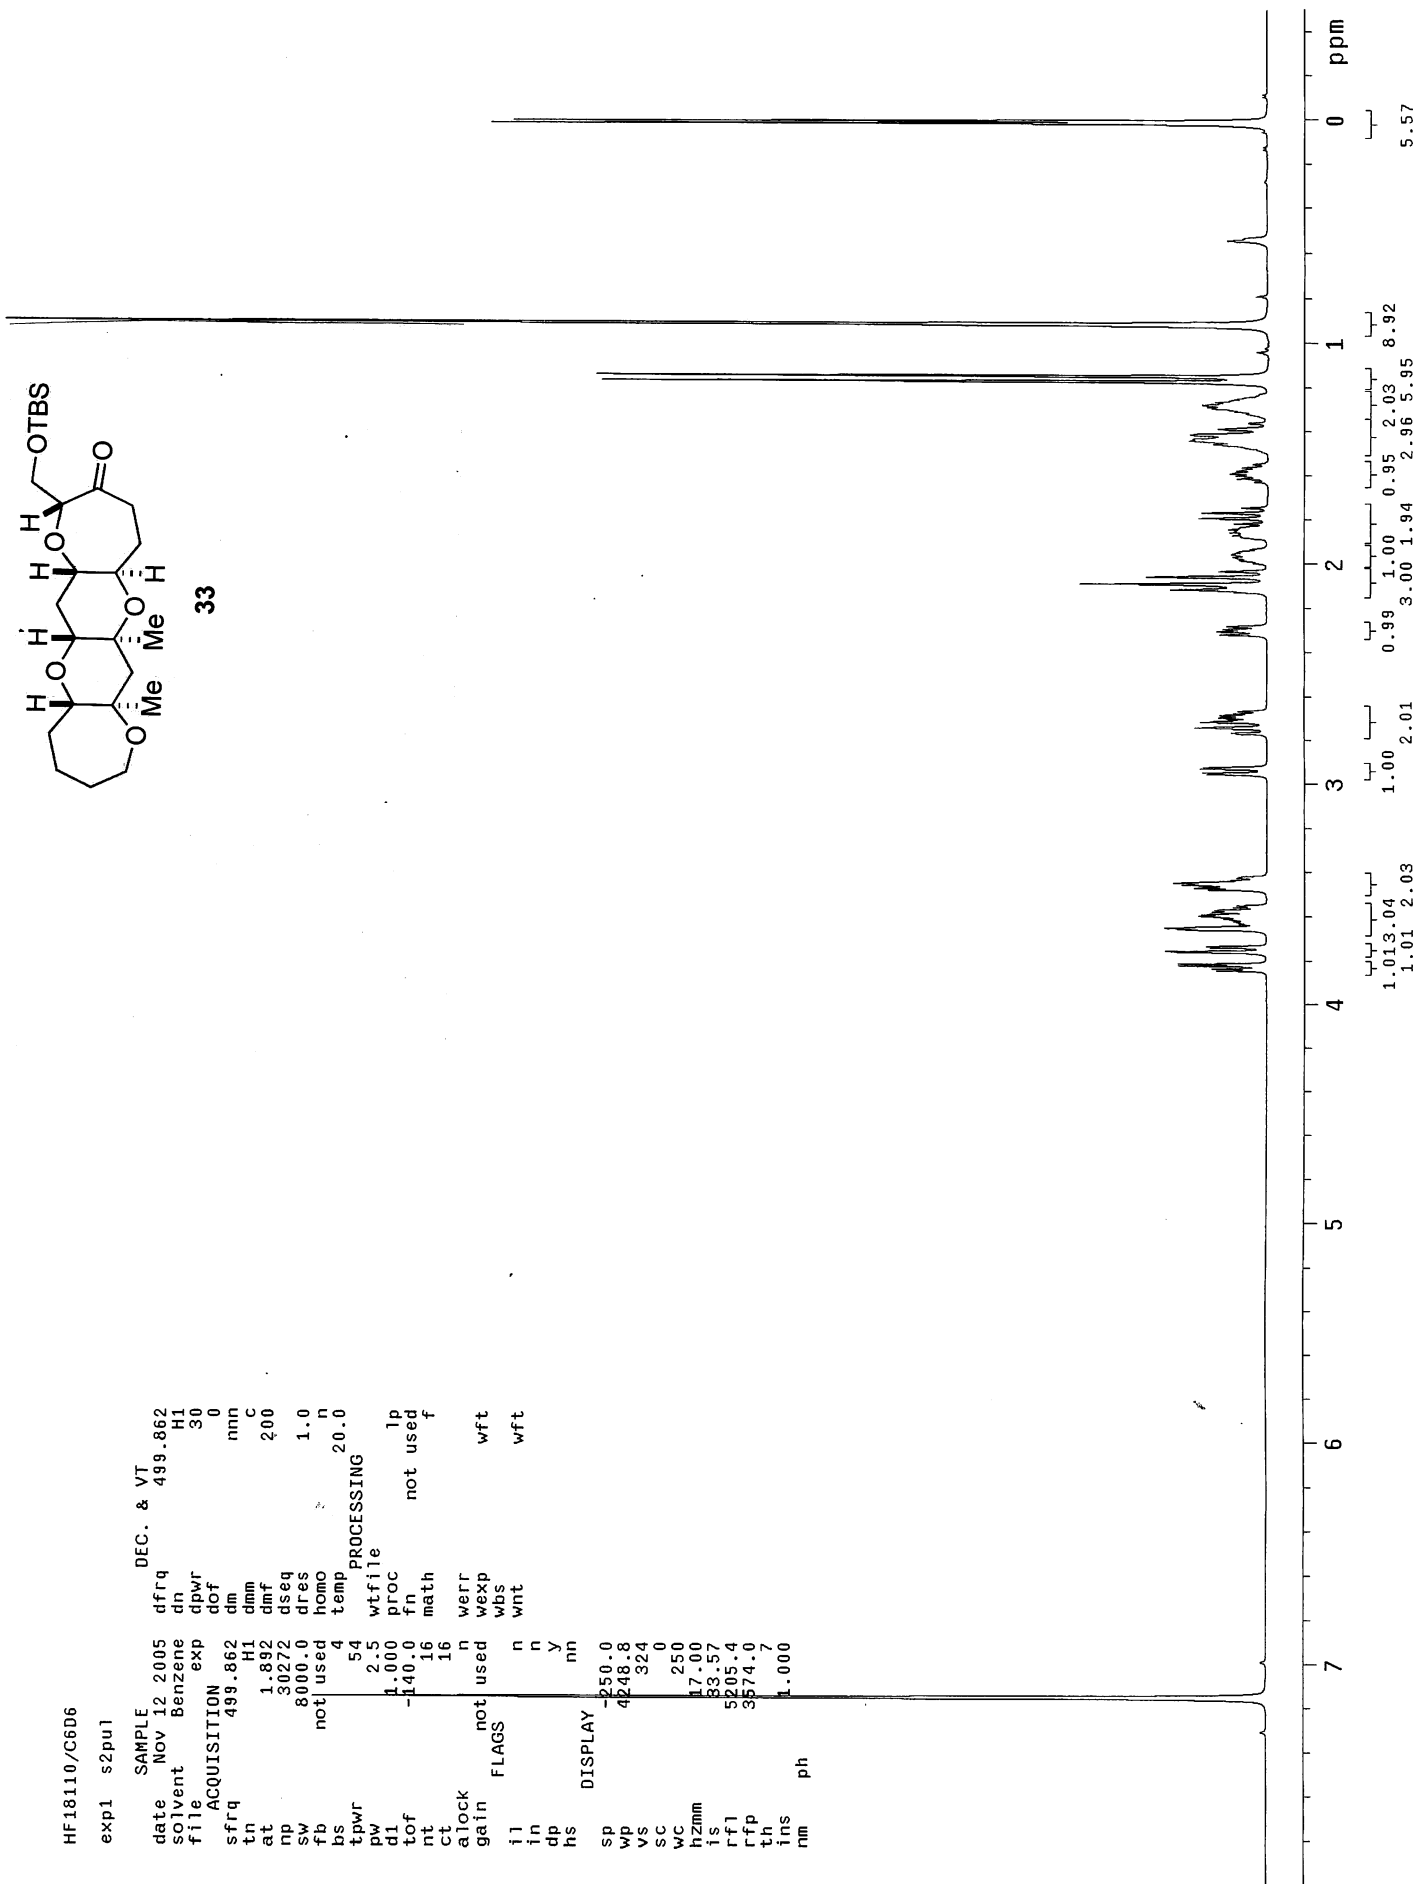

## STANDARD CARBON PARAMETERS

exp3 s2pul

SAMPLE DEC. & VT  
 date Nov 12 2005 dfrq 499.862  
 solvent Benzene dn H1  
 file exp 27  
 ACQUISITION  
 sfrq 125.704 dm yvy  
 tn 1.298 dmm 12579  
 at 1.298 dmf  
 np 97894 dseq  
 sw 37735.8 dres 1.0  
 fb not used homo n  
 bs 32 temp 20.0  
 tpwr 61 PROCESSING  
 pw 5.3 lb 0.50  
 d1 0.700 wtfile  
 tof 1883.8 proc ft  
 nt 5120 fn 131072 f  
 ct 192 math  
 alock n  
 gain 56 werr  
 flags wexp wft  
 il n  
 in n  
 dp y  
 hs nn  
 DISPLAY  
 sp -5031.9  
 wp 37735.8  
 vs 343  
 sc 0  
 wc 250  
 hzmm 150.94  
 ls 500.00  
 rfl 21120.2  
 rfp 16088.3  
 th 8  
 ins 100.000  
 nm cdc ph

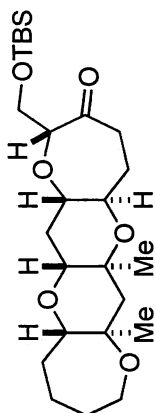

33

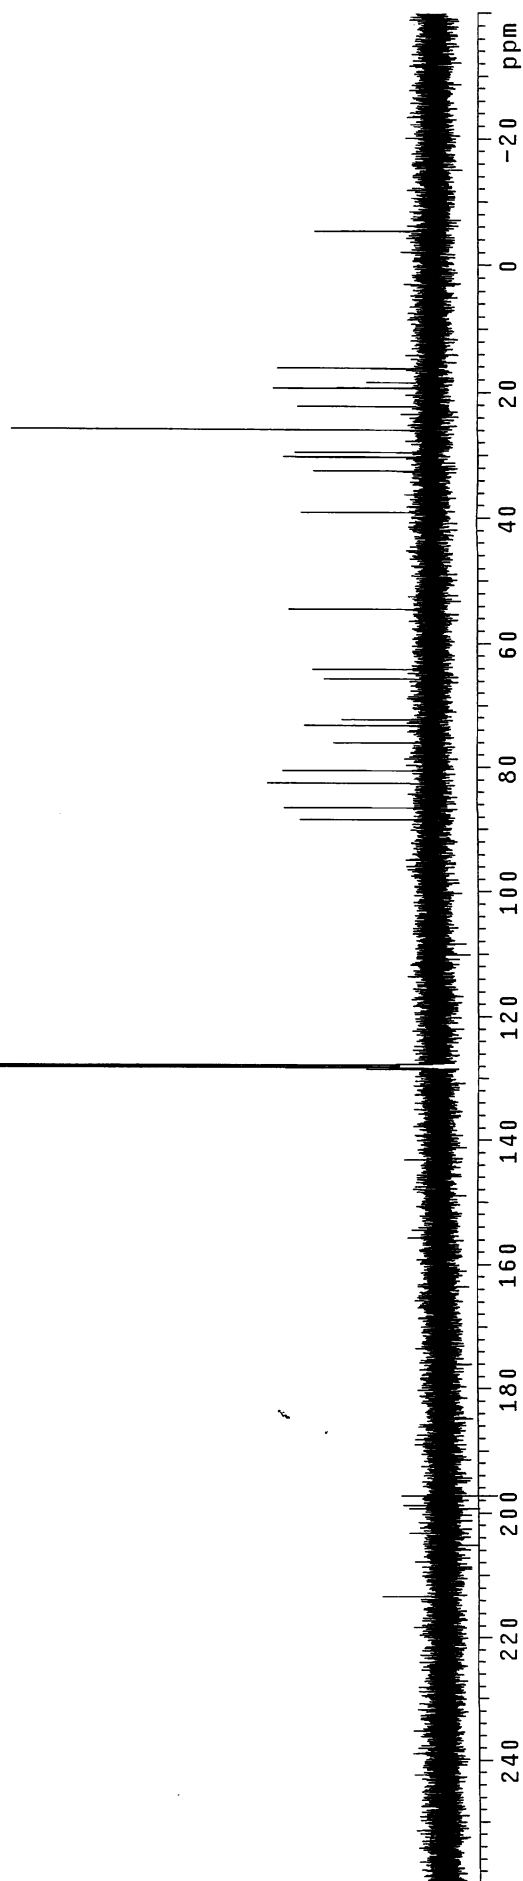

X: parts per Million : Proton : parts per Million

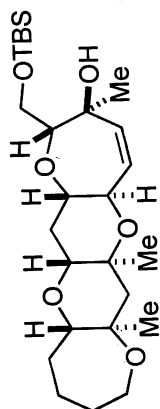

34

```

Filename = C:\Users\delta\Documents\
Author = delta
Experiment = proton.jpg
Sample_Id = HF18116
Solvent = BENZENE-D6
Creation_Time = 24-MAY-2011 17:33:49
Revision_Time = 24-MAY-2011 17:36:33
Current_Time = 24-MAY-2011 17:36:49

Comment = single_pulse
Data_Format = 1D COMPLEX
Dim_Size = 26214
Dim_Title = Proton
Dim_Units = [ppm]
Dimensions = X
Site = ECA600
Spectrometer = DELTA2_NMR

Field_Strength = 14.09636928[T] (600[MHz])
X_Acq_Duration = 2.9097984[s]
X_Domain = 1H
X_Freq = 600.1723046[MHz]
X_Offset = 5[ppm]
X_Phase = 32768
X_Points = 1
X_Prescans = 0.34366642[Hz]
X_Resolution = 11.26126126[kHz]
X_Sweep = 9.09090901[kHz]
X_Sweep_Clippped = Proton
Irr_Domain = 600.1723046[MHz]
Irr_Freq = 5[ppm]
Irr_Offset = Proton
Tri_Domain = 600.1723046[MHz]
Tri_Freq = 5[ppm]
Tri_Offset = FALSE
Clipped = 8
Scans = 8
Total_Scans = 8

Relaxation_Delay = 1[s]
Recvr_Gain = 42
Temp_Get = 21.2[dc]
X_X_90_Width = 13.3[us]
X_Acq_Time = 2.9097984[s]
X_Angle = 45[deg]
X_Atn = 3[db]
X_X_Pulse = 6.65[us]
Irr_Mode = Off
Tri_Mode = Off
Dante_Presat = FALSE
Initial_Wait = 1[s]
Repetition_Time = 3.9097984[s]

```

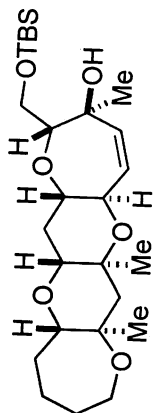

34

Filename = C:\Users\delta\Documents\J  
 Author = delta  
 Experiment = carbon.jxp  
 Sample\_Id = HF18116  
 Solvent = BENZENE-D6  
 Creation\_Time = 24-MAY-2011 17:36:07  
 Revision\_Time = 24-MAY-2011 17:49:00  
 Current\_Time = 24-MAY-2011 17:49:20  
 Comment = single pulse decoupled gat  
 Data\_Format = 1D COMPLEX  
 Dim\_Size = 26214  
 Dim\_Title = Carbon13  
 Dim\_Units = [ppm]  
 Dimensions = X  
 Site = ECA600  
 Spectrometer = DELTA2\_NMR  
 Field\_Strength = 14.09636928[T] (600[MHz])  
 X\_Acq\_Duration = 0[s]  
 X\_Domain = 13C  
 X\_Freq = 150.91343039[MHz]  
 X\_Offset = 100[ppm]  
 X\_Points = 32768  
 X\_Prescans = 4  
 X\_Resolution = 1.44496109[Hz]  
 X\_Sweep = 47.34848485[MHz]  
 X\_Sweep\_Clipped = 37.87878788[MHz]  
 Irr\_Domain = Proton  
 Irr\_Freq = 600.1723046[MHz]  
 Irr\_Offset = 5[ppm]  
 Clipped = FALSE  
 Incomplete\_Copy = TRUE  
 Scans = 256  
 Total\_Scans = 256  
 Relaxation\_Delay = 2[s]  
 Recvr\_Gain = 50  
 Temp\_Get = 22.2[dc]  
 X\_90\_Width = 8.8[us]  
 X\_Acq\_Time = 0.69206016[s]  
 X\_Angle = 30[deg]  
 X\_Pulse = 2.93333333[us]  
 Irr\_Atn\_Dec = 18[db]  
 Irr\_Atn\_Noise = 18[db]  
 Irr\_Noise = WALTZ  
 Irr\_Pwidth = 76[us]  
 Decoupling = TRUE  
 Initial\_Wait = 1[s]  
 Noe\_Time = 2[s]  
 Repetition\_Time = 2.69206016[s]

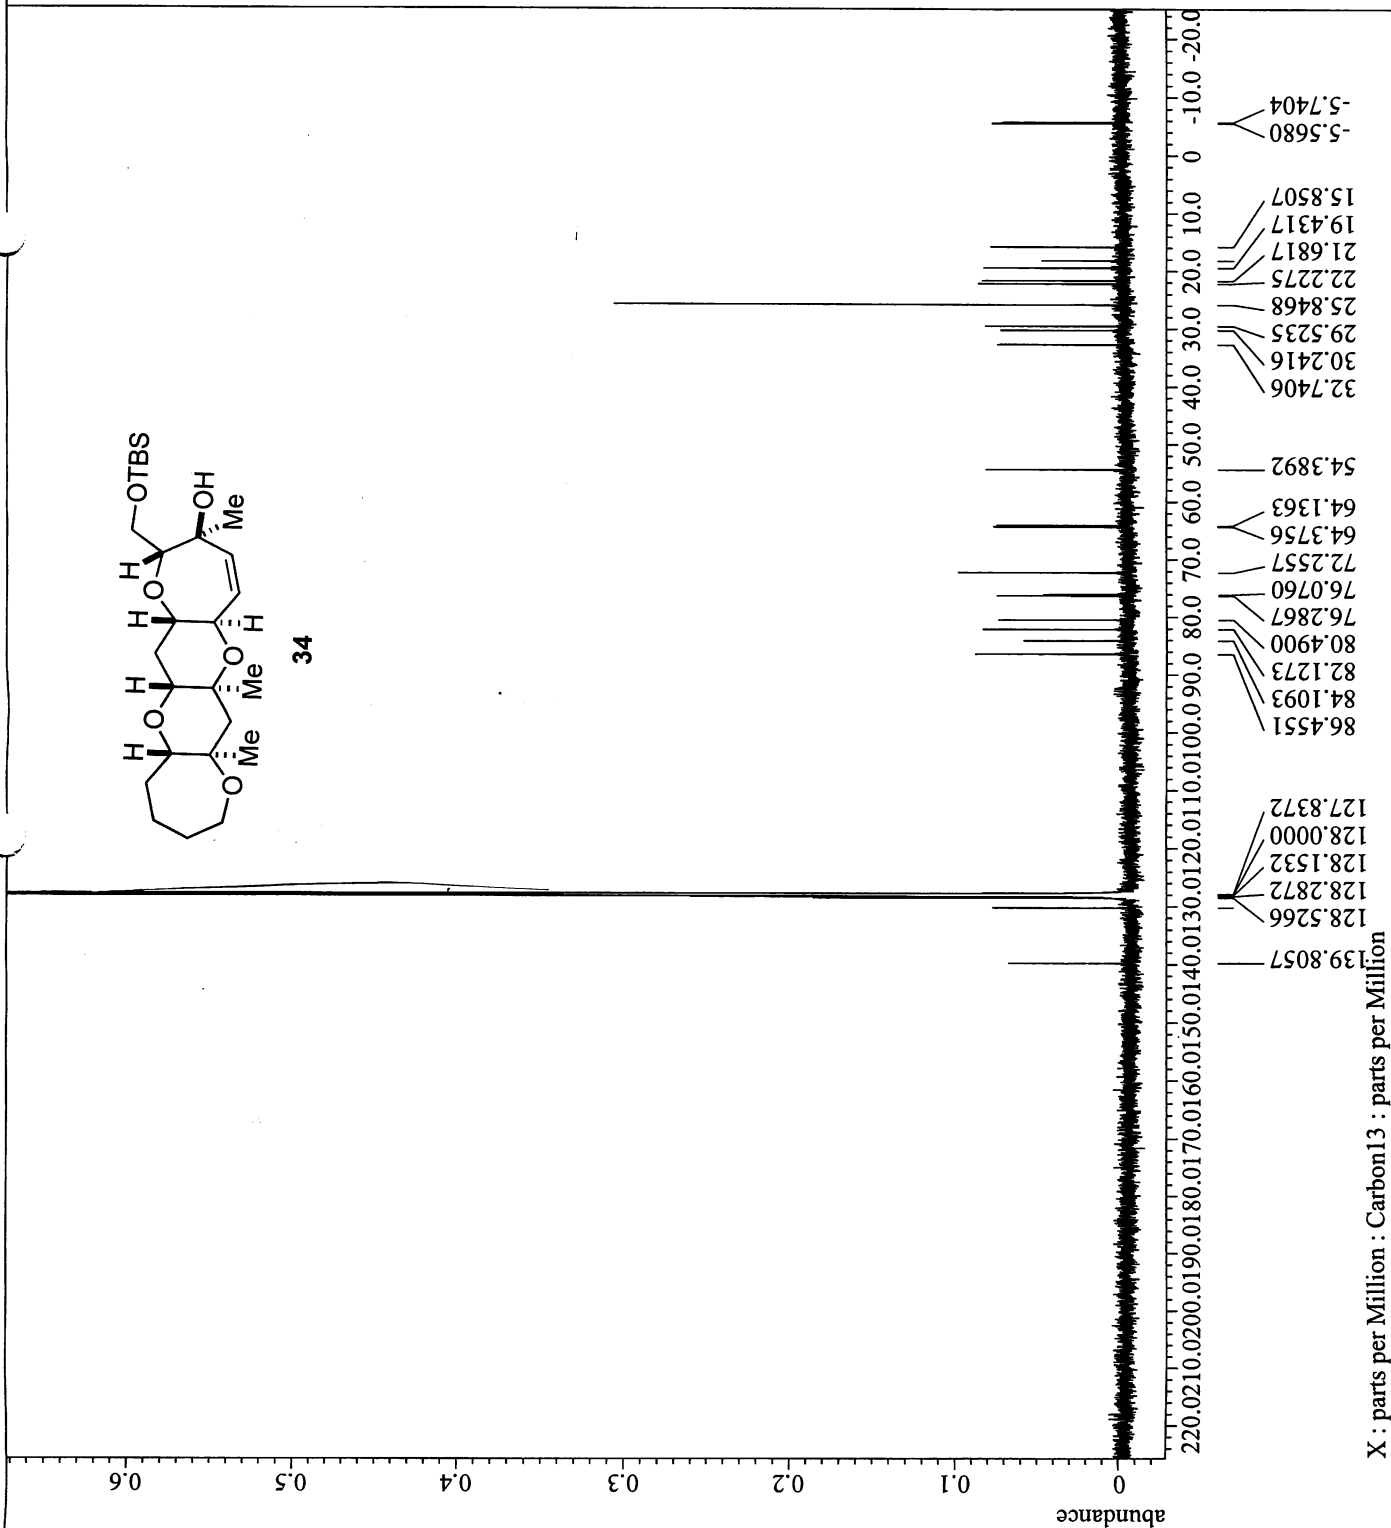

X : parts per Million : Carbon13 : parts per Million

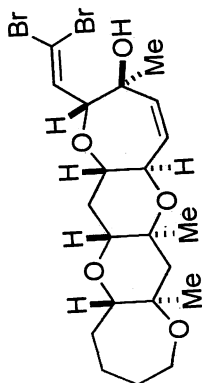

Chemical structure of compound 35 is shown. The structure is a complex polycyclic molecule with multiple stereocenters and functional groups, including bromine atoms and a hydroxyl group. The structure is labeled 35.

<sup>1</sup>H NMR spectrum (X : parts per Million : Proton : parts per Million) of compound 35. The spectrum shows peaks in the aromatic region (6.5-7.3 ppm) and aliphatic region (0.4-5.7 ppm). The x-axis is labeled 'abundance' and ranges from 0 to 1.8. The y-axis is labeled 'X : parts per Million : Proton : parts per Million' and ranges from 0 to 9.0.

Peak list (ppm):

- 7.2840
- 7.0206
- 6.5373
- 6.5241
- 5.6646
- 5.6612
- 5.5369
- 5.5329
- 5.5158
- 4.2617
- 4.2497
- 4.2457
- 4.1060
- 3.5981
- 3.4292
- 3.0003
- 2.9845
- 2.1276
- 2.1156
- 1.1725
- 1.1301
- 1.0746
- 0.8896
- 0.4161
- 0.4109

Integration values (from left to right):

- 0.95
- 1.03
- 1.00
- 1.01
- 0.98
- 1.04
- 0.98
- 2.00
- 1.00
- 0.94
- 1.95
- 1.02
- 0.99
- 0.99
- 1.96
- 2.01
- 2.88
- 2.81

X : parts per Million : Proton : parts per Million

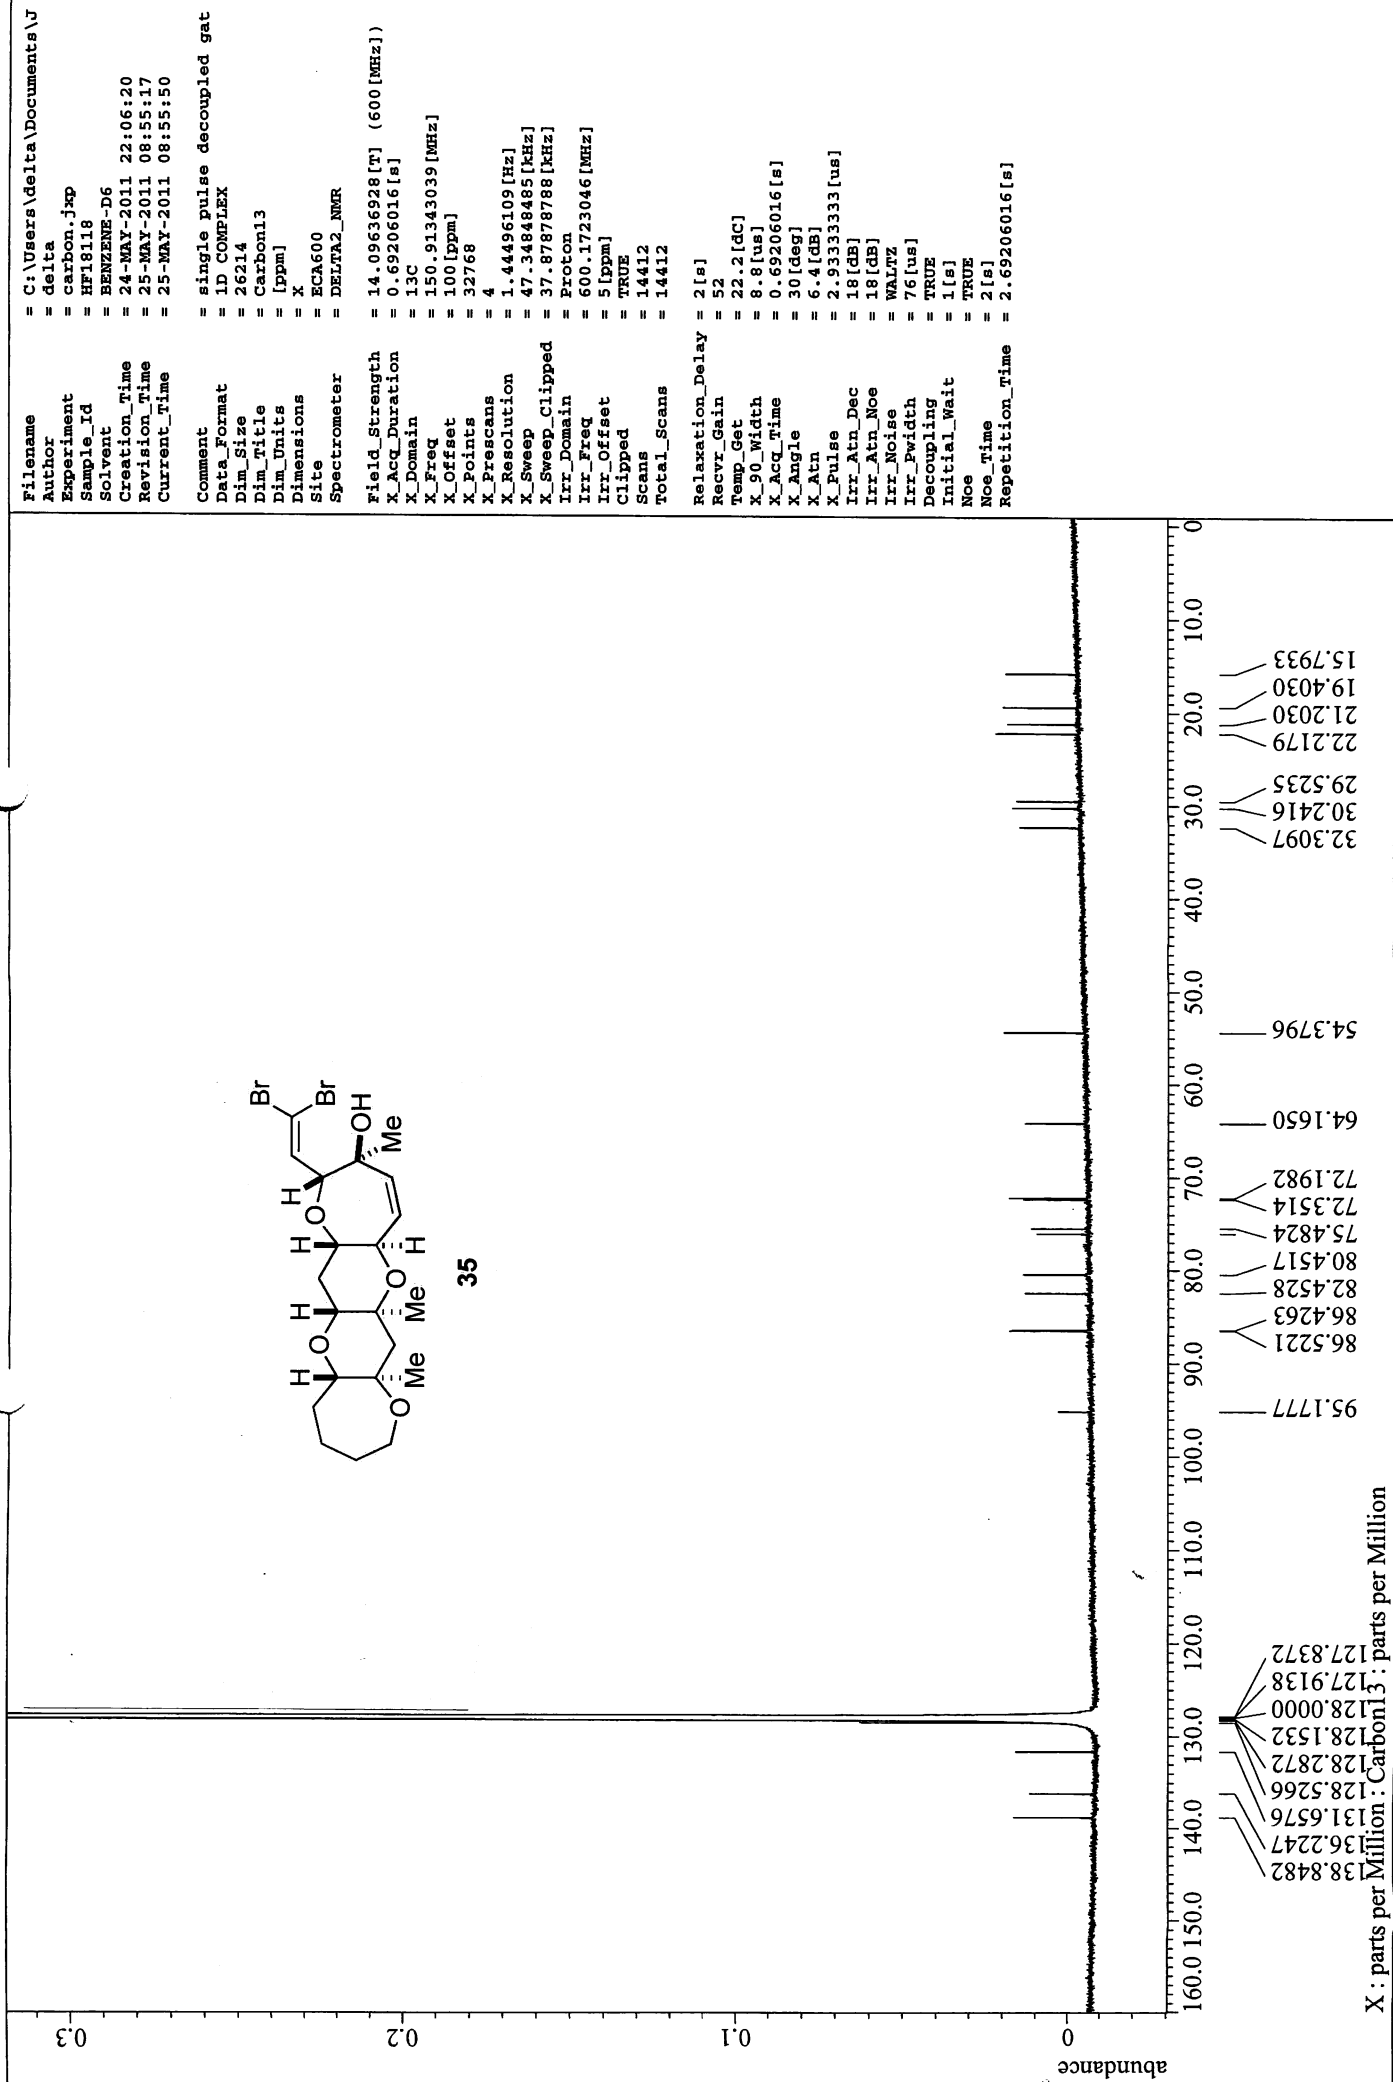



HF18120/C6D6

exp1 s2pu1

SAMPLE DEC. & VI  
 date Nov 21 2005 dfrq 499.862  
 solvent Benzene dn H1  
 file exp 30  
 ACQUISITION dpwr 0  
 sfrq 499.862 dm nnn  
 tn H1 c  
 at 1.892 dmf 200  
 np 30272 dseq 1.0  
 sw 8000.0 dres n  
 not used fb n  
 temp 20.0  
 bs 4  
 tpwr 54  
 pw 2.5  
 d1 1.000 proc lp  
 tof -140.0 fn not used f  
 nt 8 math  
 ct 8 werr  
 gain not used wbs wft  
 il n wnt  
 in n  
 dp y  
 hs nn  
 DISPLAY  
 sp -250.0  
 wp 4248.8  
 vs 271  
 sc 0  
 wc 250  
 hzmm 17.00  
 is 83.57  
 rfl 5205.9  
 rfp 3674.0  
 th 7  
 ins 1.000  
 nm ph

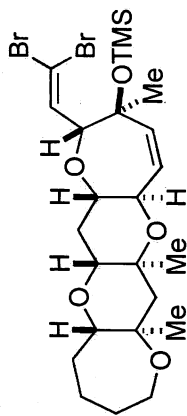

36

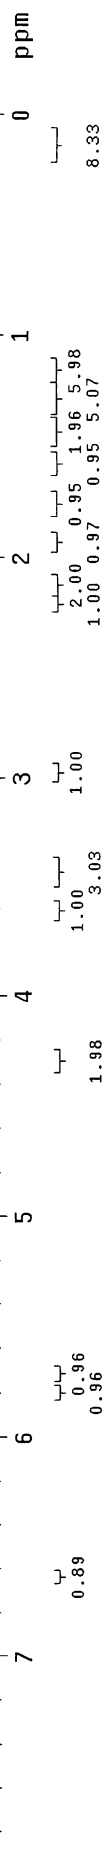

## STANDARD CARBON PARAMETERS

exp3 s2pul

|             |             |            |         |
|-------------|-------------|------------|---------|
| SAMPLE      |             | DEC. & VT  |         |
| date        | Nov 21 2005 | dfrq       | 499.862 |
| solvent     | Benzene     | dn         | H1      |
| file        | exp         | dpwr       | 27      |
| ACQUISITION |             | dof        | 0       |
| sfrq        | 125.704     | dm         | VVY     |
| tn          | 1.238       | dmm        | 12579   |
| at          | 97994       | dmf        |         |
| np          | 37735.8     | dseq       |         |
| sw          | not used    | dres       | 1.0     |
| fb          | 32          | homo       | n       |
| bs          | 61          | temp       | 20.0    |
| tpwr        | 5.3         | PROCESSING |         |
| pw          | 0.700       | lb         | 0.50    |
| d1          | 1883.8      | wtfile     |         |
| tof         | 5120        | proc       | ft      |
| nt          | 224         | fn         | 131072  |
| ct          | n           | math       | f       |
| alock       | 56          | werr       |         |
| gain        | n           | wexp       | wft     |
| il          | n           | wbs        |         |
| in          | y           | wnt        |         |
| hs          | nn          |            |         |
| DISPLAY     |             |            |         |
| sp          | -1256.9     |            |         |
| wp          | 25137.7     |            |         |
| vs          | 452         |            |         |
| sc          | 0           |            |         |
| wc          | 250         |            |         |
| hzmh        | 100.55      |            |         |
| is          | 500.00      |            |         |
| rfl         | 21120.2     |            |         |
| rfl         | 16088.3     |            |         |
| th          | 8           |            |         |
| ins         | 100.000     |            |         |
| nm          |             |            |         |
|             | ph          |            |         |

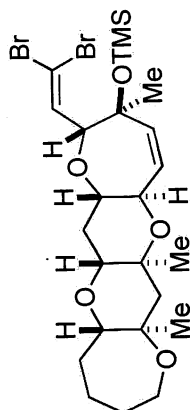

36

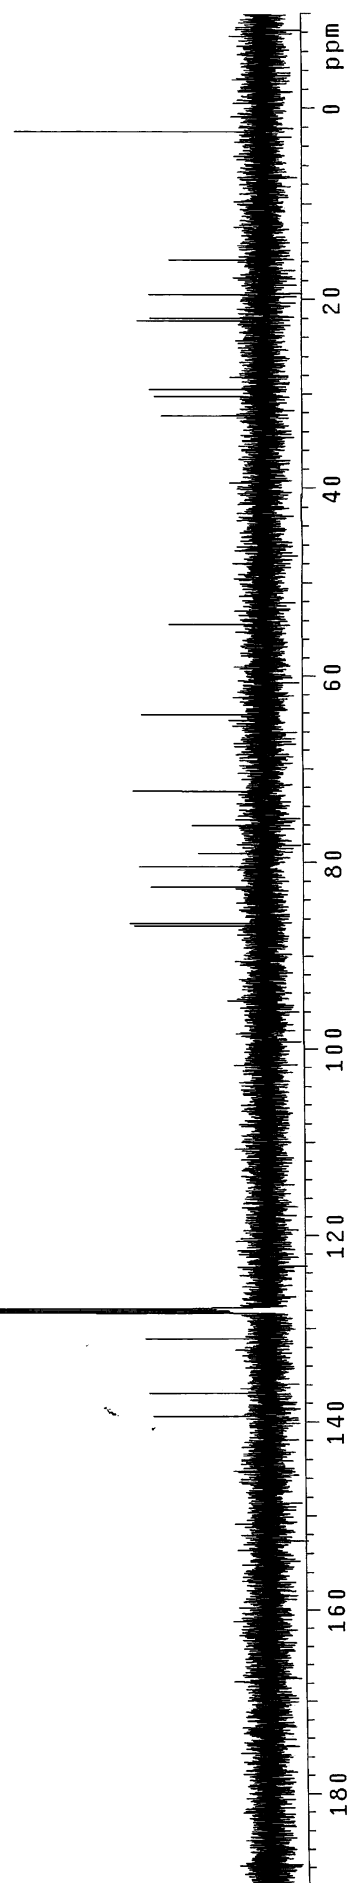

HF18121/C606

exp3 s2pul

|             |             |            |          |
|-------------|-------------|------------|----------|
| SAMPLE      |             | DEC. & VT  |          |
| date        | Nov 22 2005 | dfrq       | 499.862  |
| solvent     | Benzene     | dn         | H1       |
| file        | exp         | dpwr       | 30       |
| ACQUISITION |             | dof        | 0        |
| sfrq        | 499.862     | dm         | nnn      |
| tn          | H1          | dmf        | c        |
| at          | 1.892       | dseq       | 200      |
| np          | 30272       | dres       | 1.0      |
| sw          | 8000.0      | homo       | n        |
| fb          | not used    | temp       | 20.0     |
| bs          | 4           | PROCESSING |          |
| tpwr        | 54          | wfile      | lp       |
| pw          | 2.5         | proc       | not used |
| dl          | 1.000       | fn         | math     |
| tof         | -140.0      | werr       | wft      |
| nt          | 16          | wexp       | wft      |
| ct          | 16          | wbs        | wft      |
| gain        | not used    | wn         |          |
| il          | n           | wn         |          |
| in          | n           |            |          |
| dp          | y           |            |          |
| hs          | nn          |            |          |
| DISPLAY     |             |            |          |
| sp          | -250.0      |            |          |
| wp          | 4248.8      |            |          |
| vs          | 225         |            |          |
| sc          | 0           |            |          |
| wc          | 250         |            |          |
| hzmm        | 17.00       |            |          |
| is          | 83.57       |            |          |
| rfl         | 5203.3      |            |          |
| rff         | 3574.0      |            |          |
| th          | 7           |            |          |
| ins         | 1.000       |            |          |
| nm          | ph          |            |          |

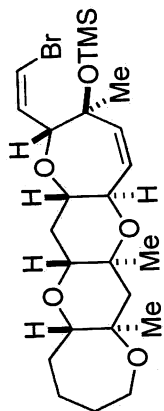

37

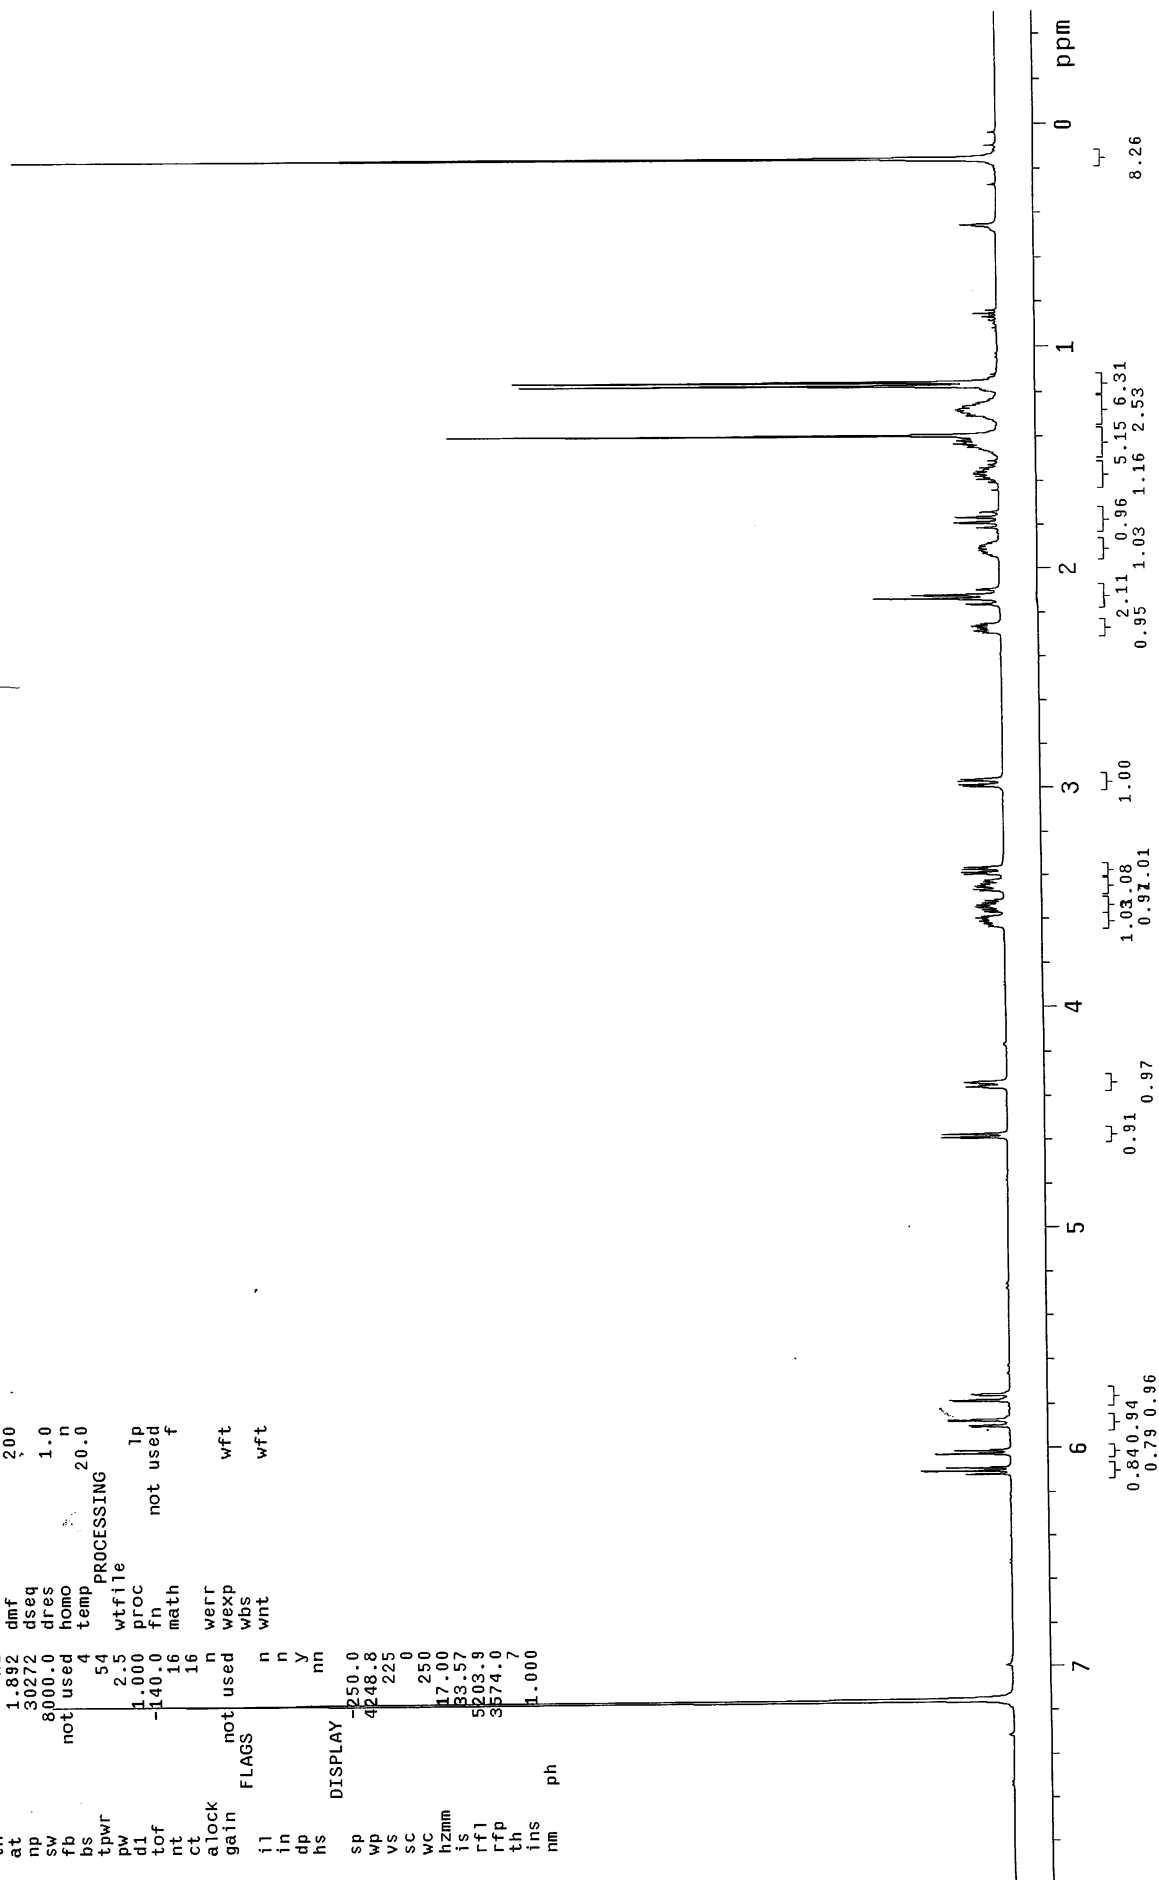

## STANDARD CARBON PARAMETERS

exp5 s2pul

SAMPLE DEC. & VT  
 date Nov 22 2005 dfrq 499.862  
 solvent Benzene dn H1  
 file exp 27  
 ACQUISITION dpr 0  
 sfrq 125.704 dpr 0  
 tn 1.238 dnm 12579  
 at 37994 dnf 1.0  
 np 37735.8 dres 1.0  
 sw not used fmo n  
 bs 32 temp 20.0  
 tpwr 61 PROCESSING  
 pw 5.3 tb 0.50  
 d1 0.700 wfile  
 tof 1883.8 proc ft  
 nt 5120 fn 131072 f  
 ct 192 math  
 alock n  
 gain 56 werr wft  
 il n  
 in n  
 dp y  
 hs nn  
 DISPLAY  
 sp -702.4  
 wp 19695.7  
 vs 428  
 sc 0  
 wc 250  
 hzmm 78.78  
 is 500.00  
 rfl 21120.2  
 rfp 16088.3  
 th 9  
 ins 100.000  
 nm ph

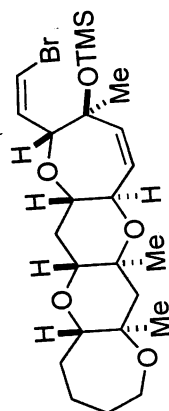

37

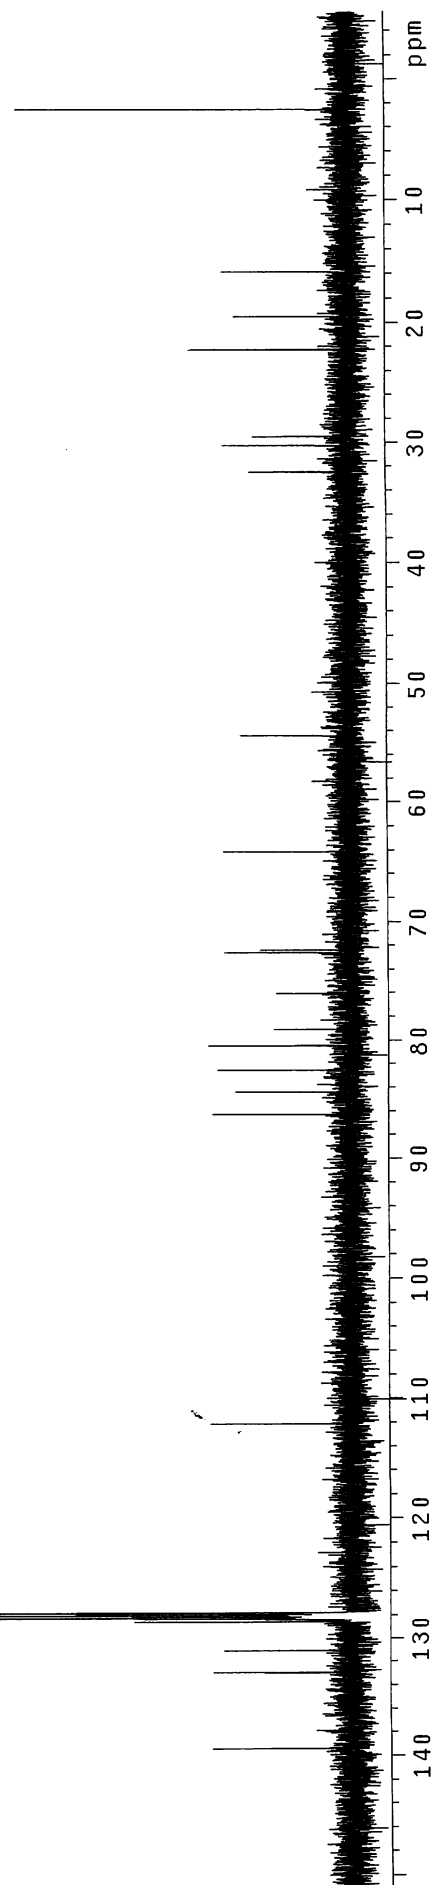

HF18127/CDC13

exp1 s2pul

|             |             |            |          |
|-------------|-------------|------------|----------|
| SAMPLE      |             | DEC. & VT  |          |
| date        | Nov 26 2005 | dfrq       | 499.862  |
| solvent     | CDC13       | dn         | H1       |
| file        | exp         | dpwr       | 30       |
| ACQUISITION |             | dof        | 0        |
| sfrq        | 499.862     | dm         | nnn      |
| tn          | H1          | dmm        | C        |
| at          | 1.892       | dmf        | 200      |
| np          | 30272       | dseq       |          |
| sw          | 8000.0      | dres       | 1.0      |
| fb          | not used    | homo       | n        |
| bs          | 4           | temp       | 20.0     |
| tpwr        | 54          | PROCESSING |          |
| pw          | 2.5         | wfile      |          |
| d1          | 1.000       | proc       | lp       |
| tof         | -140.0      | fn         | not used |
| nt          | 8           | math       | f        |
| ct          | 8           | werr       |          |
| alock       | not used    | wexp       | wft      |
| gain        |             | wbs        |          |
| FLAGS       |             | wnt        | wft      |
| il          | n           |            |          |
| in          | n           |            |          |
| dp          | y           |            |          |
| hs          | nn          |            |          |
| DISPLAY     |             |            |          |
| sp          | -250.4      |            |          |
| wp          | 4248.8      |            |          |
| vs          | 156         |            |          |
| sc          | 0           |            |          |
| wc          | 250         |            |          |
| hzmm        | 17.00       |            |          |
| ls          | 33.57       |            |          |
| rfl         | 5277.2      |            |          |
| rfl         | 3619.0      |            |          |
| th          | 7           |            |          |
| ins         | 1.000       |            |          |
| nm          |             |            |          |

38

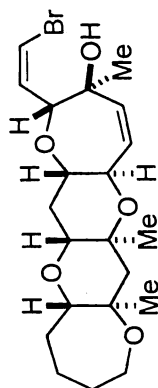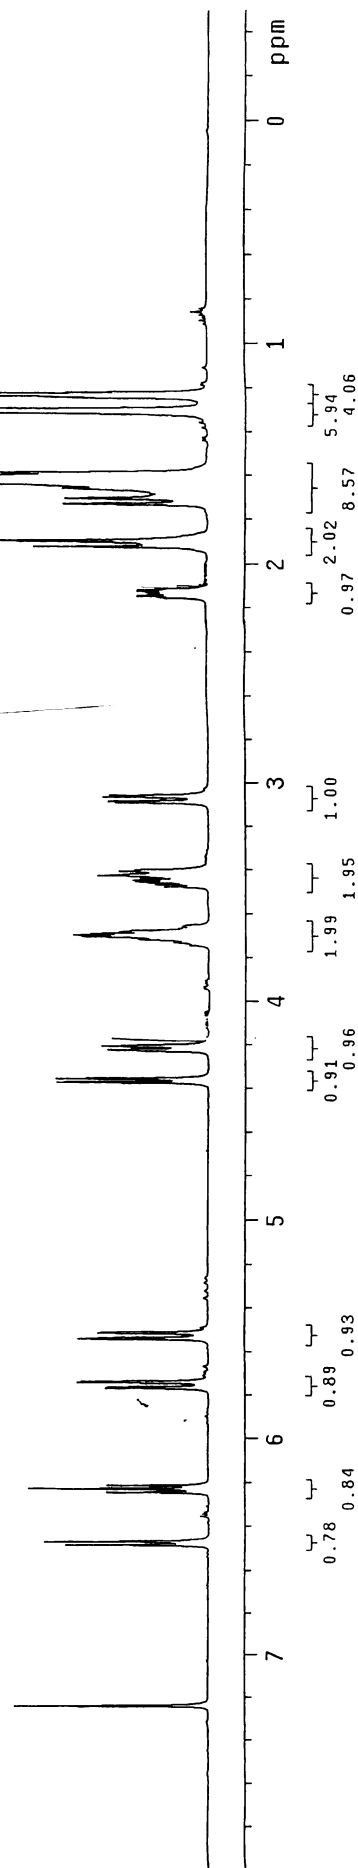

## STANDARD CARBON PARAMETERS

```

exp3  s2pu1
SAMPLE
date Nov 26 2005   DEC. & VT
solvent CDC13      dfrq 499.862
file      exp 27   H1
ACQUISITION      exp 27   H1
sfrq 125.704 dm  YVY 12579
tn 1.298 dmf  W
at 97994 dseq 12579
np 37735.8 dres 1.0
sw not used homo n
bs 32 temp 20.0
tpwr 61
pw 5.3 lb 0.50
dl 0.700 wfile
tof 1883.8 proc ft
nt 5120 fn 131072 f
ct 192 math
alock n
gain 56 werr wft
il n
in n wbs
dp n y wnt
hs nn
DISPLAY
sp -1257.2
wp 20110.2
vs 667
sc 0
wc 250
hzmm 80.44
is 500.00
rfl 5042.1
rfp 0
th 7
ins 100.000
al ph

```

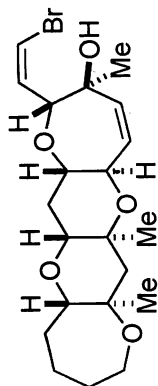

38

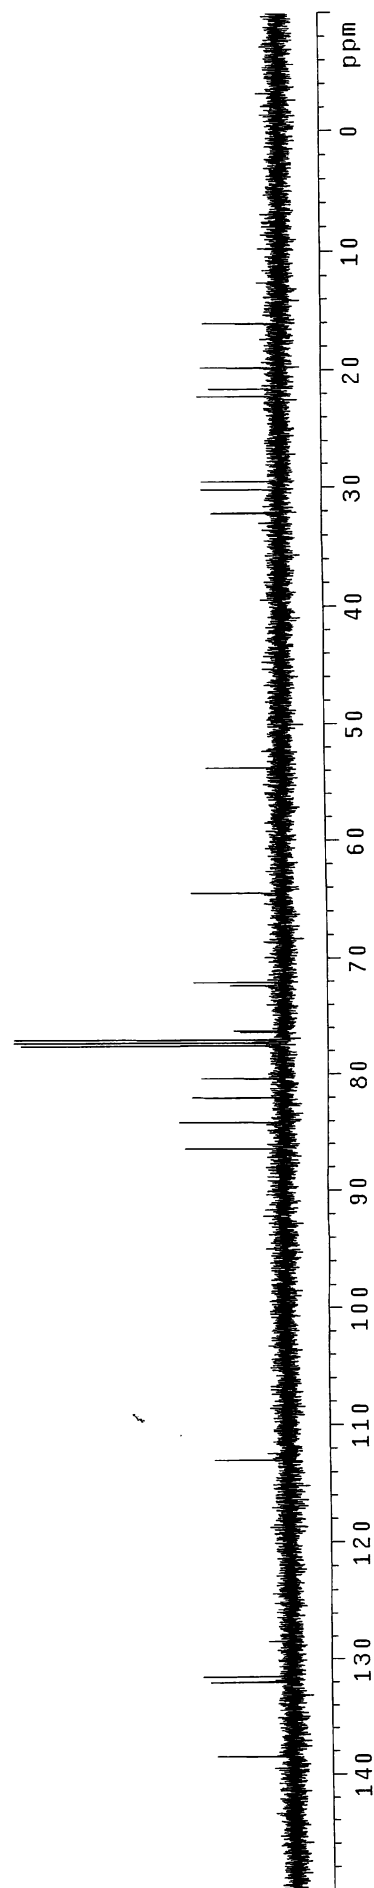

HF18129/C6D6

exp1 s2pu1

|             |          |            |          |
|-------------|----------|------------|----------|
| SAMPLE      |          | DEC. & VT  |          |
| date        | 1 2005   | dfrq       | 499.862  |
| solvent     | Benzene  | dn         | H1       |
| file        | exp      | dpwr       | 30       |
| ACQUISITION |          | dof        | 0        |
| sfrq        | 499.862  | nm         | nm       |
| tn          | H1       | nm         | C        |
| at          | 1.892    | dmf        | 200      |
| np          | 30272    | dseq       |          |
| sw          | 8000.0   | dres       | 1.0      |
| fb          | not used | homo       | n        |
| bs          | 4        | temp       | 20.0     |
| tpwr        | 54       | PROCESSING |          |
| pw          | 2.5      | wtfile     |          |
| d1          | 1.000    | proc       | lp       |
| tof         | 140.0    | fn         | not used |
| nt          | 16       | math       | f        |
| ct          | 16       | werr       |          |
| alock       | n        | wexp       |          |
| gain        | not used | wbs        |          |
| il          | n        | wnt        | wft      |
| in          | n        |            |          |
| dp          | Y        |            |          |
| hs          | nn       |            |          |
| DISPLAY     |          |            |          |
| sp          | -250.0   |            |          |
| wp          | 4248.8   |            |          |
| vs          | 124      |            |          |
| sc          | 0        |            |          |
| wc          | 250      |            |          |
| hzmm        | 17.00    |            |          |
| is          | 83.57    |            |          |
| rfl         | 5205.8   |            |          |
| rfp         | 3574.0   |            |          |
| th          | 7        |            |          |
| ins         | 1.000    |            |          |
| nm          |          |            |          |

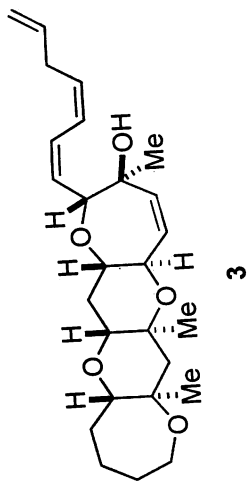

3

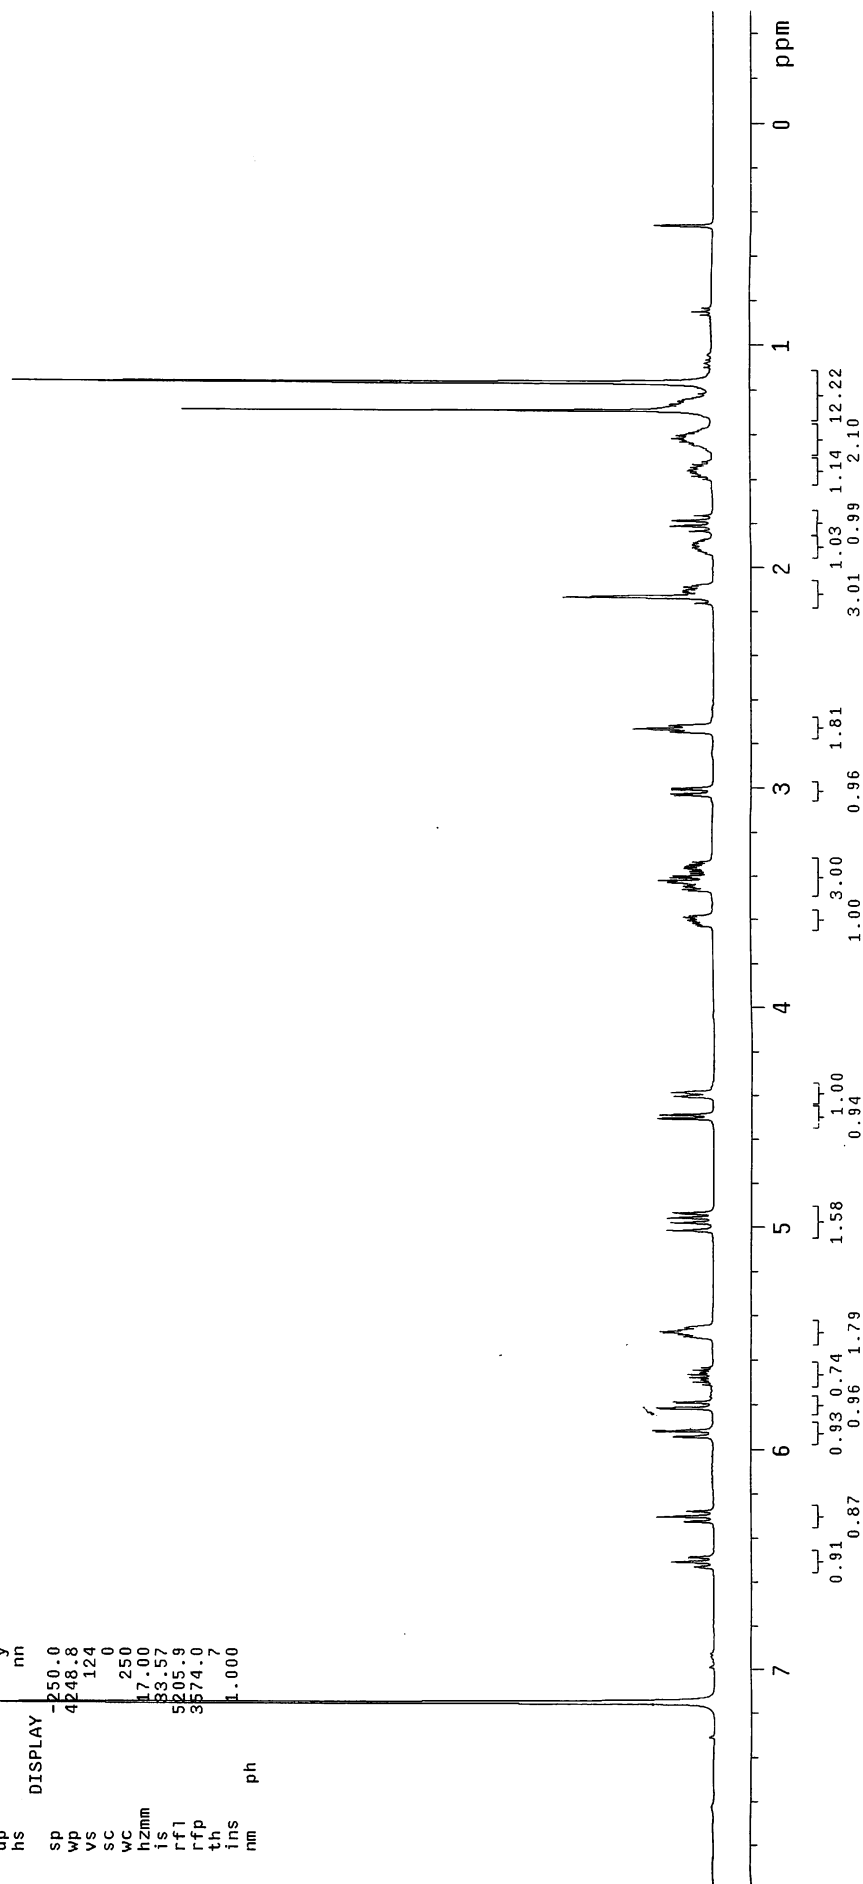

## STANDARD CARBON PARAMETERS

exp2 s2pu1

SAMPLE DEC. & VT  
 date 1.2005 dfreq 499.862  
 solvent Benzene dn H1  
 file exp 27  
 ACQUISITION  
 sfrq 125.704 dm yvy  
 tn C13 dnm 12578  
 at 1.298 dmf dseq  
 np 97994 dres 1.0  
 sw 37735.8 homo n  
 fb not used temp 20.0  
 bs 32  
 tpwr 61  
 pw 5.3 lb  
 d1 0.700 wfile  
 tof 1883.8 proc ft  
 nt 5120 fn 131072  
 ct 288 math f  
 alock n  
 gain 56 werr wft  
 il n wexp wft  
 in n wbs  
 dp n y  
 hs nm  
 DISPLAY  
 sp -5031.4  
 wp 37735.8  
 vs 410  
 sc 0  
 wc 250  
 hzmm 150.94  
 ls 500.00  
 rfl 21113.6  
 rfp 16088.3  
 th 7  
 ins 100.000  
 nm ph

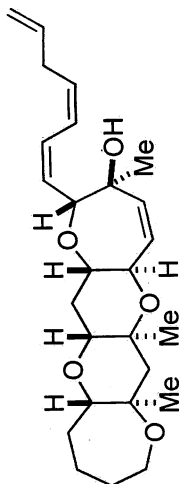

3

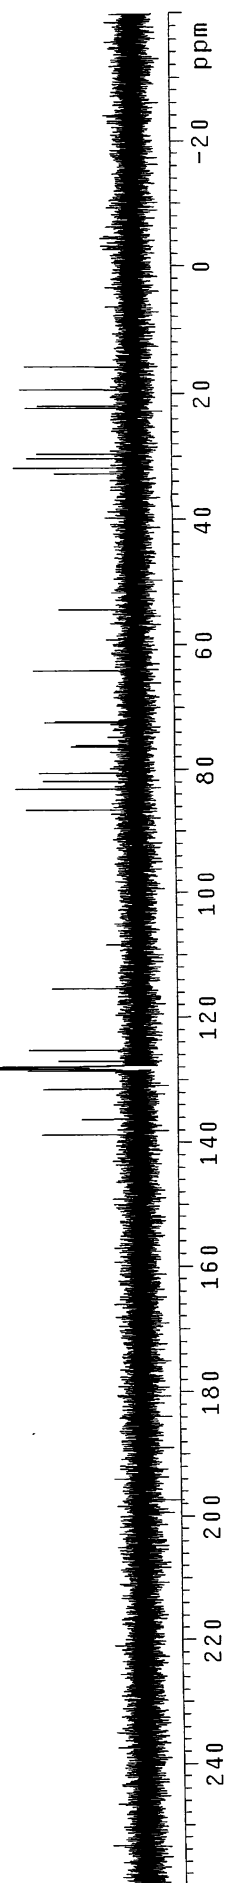

Supplement: Supplementary file 1 [file 4169704]
